# Supplementary material for: Construction of a Versatile, Programmable RNA-Binding Protein Using Designer PPR Proteins and Its Application for Splicing Control in Mammalian Cells
Source: Cells. 2022 Nov 8;11(22):3529. doi: 10.3390/cells11223529 (PMC9688318; doi:10.3390/cells11223529)
Supplement: Supplementary file 1 [file cells-11-03529-s001.zip]

Archive with 6 entries (6 files):
- Table_S1_YY_etal.xlsx
- Table_S2_YY_etal.xlsx
- Table_S3_YY_eta.xlsx
- Table_S4_YY_eta.xlsx
- Table_S5_YY_eta.xlsx
- Yagi_etal_Supporting information.pdf
