# Supplementary material for: Construction of a Versatile, Programmable RNA-Binding Protein Using Designer PPR Proteins and Its Application for Splicing Control in Mammalian Cells
Source: Cells. 2022 Nov 8;11(22):3529. doi: 10.3390/cells11223529 (PMC9688318; doi:10.3390/cells11223529)
Supplement: Supplementary file 1 [file cells-11-03529-s001.zip › Table_S1_YY_etal.xlsx]

## Sheet: Sheet1
Table S1 Nucleotide sequence of two PPR sequence in intermediate plasmid of pL_X
pL_X	Scaffold	recognition base		Nucleotide sequence
		1st motif	2nd motif
pL_1	SCD	A	A	GAAGACATAAACTCCGTGGTCACATACACCACGCTGATCGATGGTCTGTGTAAGGCCGGCAAATTAGATGAGGCCCTGAAGTTATTCGAAGAGATGGTTGAAAAAGGCATCAAGCCGAACGTGGTCACATACACCACGCTGATCGATGGTCTGTGTAAGGCCGGCAAATTAGATGAGGCCCTGAAGTTATTCGAAGAGATGGTTGAAAAAGGCATCAAGCCGAACGTGGTCACATAATGTCTTC
pL_1	SCD	A	C	GAAGACATAAACTCCGTGGTCACATACACCACGCTGATCGATGGTCTGTGTAAGGCCGGCAAATTAGATGAGGCCCTGAAGTTATTCGAAGAGATGGTTGAAAAAGGCATCAAGCCGAACGTGGTCACATACAACACCCTGATTGATGGCTTATGCAAAGCGGGTAAGCTGGATGAAGCGTTAAAACTGTTTGAGGAAATGGTGGAGAAGGGTATTAAACCGAGCGTGGTCACATAATGTCTTC
pL_1	SCD	A	G	GAAGACATAAACTCCGTGGTCACATACACCACGCTGATCGATGGTCTGTGTAAGGCCGGCAAATTAGATGAGGCCCTGAAGTTATTCGAAGAGATGGTTGAAAAAGGCATCAAGCCGAACGTGGTCACATACACCACGCTGATCGATGGTCTGTGTAAGGCCGGTAAATTAGATGAAGCGCTGAAGTTATTCGAAGAGATGGTTGAAAAAGGTATCAAGCCGGACGTGGTCACATAATGTCTTC
pL_1	SCD	A	U	GAAGACATAAACTCCGTGGTCACATACACCACGCTGATCGATGGTCTGTGTAAGGCCGGCAAATTAGATGAGGCCCTGAAGTTATTCGAAGAGATGGTTGAAAAAGGCATCAAGCCGAACGTGGTCACATACAATACGCTGATTGATGGCTTATGTAAAGCGGGTAAGCTGGATGAGGCCTTAAAACTGTTTGAGGAAATGGTGGAGAAGGGCATTAAACCGGACGTGGTCACATAATGTCTTC
pL_1	SCD	C	A	GAAGACATAAACTCCGTGGTCACATACAACACCCTGATTGATGGCTTATGCAAAGCGGGTAAGCTGGATGAAGCGTTAAAACTGTTTGAGGAAATGGTGGAGAAGGGTATTAAACCGAGCGTGGTCACATACACCACGCTGATCGATGGTCTGTGTAAGGCCGGCAAATTAGATGAGGCCCTGAAGTTATTCGAAGAGATGGTTGAAAAAGGCATCAAGCCGAACGTGGTCACATAATGTCTTC
pL_1	SCD	C	C	GAAGACATAAACTCCGTGGTCACATACAACACCCTGATTGATGGCTTATGCAAAGCGGGTAAGCTGGATGAAGCGTTAAAACTGTTTGAGGAAATGGTGGAGAAGGGTATTAAACCGAGCGTGGTCACATACAACACCCTGATTGATGGCTTATGCAAAGCGGGTAAGCTGGATGAAGCGTTAAAACTGTTTGAGGAAATGGTGGAGAAGGGTATTAAACCGAGCGTGGTCACATAATGTCTTC
pL_1	SCD	C	G	GAAGACATAAACTCCGTGGTCACATACAACACCCTGATTGATGGCTTATGCAAAGCGGGTAAGCTGGATGAAGCGTTAAAACTGTTTGAGGAAATGGTGGAGAAGGGTATTAAACCGAGCGTGGTCACATACACCACGCTGATCGATGGTCTGTGTAAGGCCGGTAAATTAGATGAAGCGCTGAAGTTATTCGAAGAGATGGTTGAAAAAGGTATCAAGCCGGACGTGGTCACATAATGTCTTC
pL_1	SCD	C	U	GAAGACATAAACTCCGTGGTCACATACAACACCCTGATTGATGGCTTATGCAAAGCGGGTAAGCTGGATGAAGCGTTAAAACTGTTTGAGGAAATGGTGGAGAAGGGTATTAAACCGAGCGTGGTCACATACAATACGCTGATTGATGGCTTATGTAAAGCGGGTAAGCTGGATGAGGCCTTAAAACTGTTTGAGGAAATGGTGGAGAAGGGCATTAAACCGGACGTGGTCACATAATGTCTTC
pL_1	SCD	G	A	GAAGACATAAACTCCGTGGTCACATACACCACGCTGATCGATGGTCTGTGTAAGGCCGGTAAATTAGATGAAGCGCTGAAGTTATTCGAAGAGATGGTTGAAAAAGGTATCAAGCCGGATGTGGTCACATACACCACGCTGATCGATGGTCTGTGTAAGGCCGGCAAATTAGATGAGGCCCTGAAGTTATTCGAAGAGATGGTTGAAAAAGGCATCAAGCCGAACGTGGTCACATAATGTCTTC
pL_1	SCD	G	C	GAAGACATAAACTCCGTGGTCACATACACCACGCTGATCGATGGTCTGTGTAAGGCCGGTAAATTAGATGAAGCGCTGAAGTTATTCGAAGAGATGGTTGAAAAAGGTATCAAGCCGGATGTGGTCACATACAACACCCTGATTGATGGCTTATGCAAAGCGGGTAAGCTGGATGAAGCGTTAAAACTGTTTGAGGAAATGGTGGAGAAGGGTATTAAACCGAGCGTGGTCACATAATGTCTTC
pL_1	SCD	G	G	GAAGACATAAACTCCGTGGTCACATACACCACGCTGATCGATGGTCTGTGTAAGGCCGGTAAATTAGATGAAGCGCTGAAGTTATTCGAAGAGATGGTTGAAAAAGGTATCAAGCCGGATGTGGTCACATACACCACGCTGATCGATGGTCTGTGTAAGGCCGGTAAATTAGATGAAGCGCTGAAGTTATTCGAAGAGATGGTTGAAAAAGGTATCAAGCCGGACGTGGTCACATAATGTCTTC
pL_1	SCD	G	U	GAAGACATAAACTCCGTGGTCACATACACCACGCTGATCGATGGTCTGTGTAAGGCCGGTAAATTAGATGAAGCGCTGAAGTTATTCGAAGAGATGGTTGAAAAAGGTATCAAGCCGGATGTGGTCACATACAATACGCTGATTGATGGCTTATGTAAAGCGGGTAAGCTGGATGAGGCCTTAAAACTGTTTGAGGAAATGGTGGAGAAGGGCATTAAACCGGACGTGGTCACATAATGTCTTC
pL_1	SCD	U	A	GAAGACATAAACTCCGTGGTCACATACAATACGCTGATTGATGGCTTATGTAAAGCGGGTAAGCTGGATGAGGCCTTAAAACTGTTTGAGGAAATGGTGGAGAAGGGCATTAAACCGGATGTGGTCACATACACCACGCTGATCGATGGTCTGTGTAAGGCCGGCAAATTAGATGAGGCCCTGAAGTTATTCGAAGAGATGGTTGAAAAAGGCATCAAGCCGAACGTGGTCACATAATGTCTTC
pL_1	SCD	U	C	GAAGACATAAACTCCGTGGTCACATACAATACGCTGATTGATGGCTTATGTAAAGCGGGTAAGCTGGATGAGGCCTTAAAACTGTTTGAGGAAATGGTGGAGAAGGGCATTAAACCGGATGTGGTCACATACAACACCCTGATTGATGGCTTATGCAAAGCGGGTAAGCTGGATGAAGCGTTAAAACTGTTTGAGGAAATGGTGGAGAAGGGTATTAAACCGAGCGTGGTCACATAATGTCTTC
pL_1	SCD	U	G	GAAGACATAAACTCCGTGGTCACATACAATACGCTGATTGATGGCTTATGTAAAGCGGGTAAGCTGGATGAGGCCTTAAAACTGTTTGAGGAAATGGTGGAGAAGGGCATTAAACCGGATGTGGTCACATACACCACGCTGATCGATGGTCTGTGTAAGGCCGGTAAATTAGATGAAGCGCTGAAGTTATTCGAAGAGATGGTTGAAAAAGGTATCAAGCCGGACGTGGTCACATAATGTCTTC
pL_1	SCD	U	U	GAAGACATAAACTCCGTGGTCACATACAATACGCTGATTGATGGCTTATGTAAAGCGGGTAAGCTGGATGAGGCCTTAAAACTGTTTGAGGAAATGGTGGAGAAGGGCATTAAACCGGATGTGGTCACATACAATACGCTGATTGATGGCTTATGTAAAGCGGGTAAGCTGGATGAGGCCTTAAAACTGTTTGAGGAAATGGTGGAGAAGGGCATTAAACCGGACGTGGTCACATAATGTCTTC
pL_2	SCD	A	A	GAAGACATCATACACCACGCTGATCGATGGTCTGTGTAAGGCCGGCAAATTAGATGAGGCCCTGAAGTTATTCGAAGAGATGGTTGAAAAAGGCATCAAGCCGAACGTGGTCACATACACCACGCTGATCGATGGTCTGTGTAAGGCCGGCAAATTAGATGAGGCCCTGAAGTTATTCGAAGAGATGGTTGAAAAAGGCATCAAGCCGAACGTGGTTACATATGTCTTC
pL_2	SCD	A	C	GAAGACATCATACACCACGCTGATCGATGGTCTGTGTAAGGCCGGCAAATTAGATGAGGCCCTGAAGTTATTCGAAGAGATGGTTGAAAAAGGCATCAAGCCGAACGTGGTCACATACAACACCCTGATTGATGGCTTATGCAAAGCGGGTAAGCTGGATGAAGCGTTAAAACTGTTTGAGGAAATGGTGGAGAAGGGTATTAAACCGAGCGTGGTTACATATGTCTTC
pL_2	SCD	A	G	GAAGACATCATACACCACGCTGATCGATGGTCTGTGTAAGGCCGGCAAATTAGATGAGGCCCTGAAGTTATTCGAAGAGATGGTTGAAAAAGGCATCAAGCCGAACGTGGTCACATACACCACGCTGATCGATGGTCTGTGTAAGGCCGGTAAATTAGATGAAGCGCTGAAGTTATTCGAAGAGATGGTTGAAAAAGGTATCAAGCCGGACGTGGTTACATATGTCTTC
pL_2	SCD	A	U	GAAGACATCATACACCACGCTGATCGATGGTCTGTGTAAGGCCGGCAAATTAGATGAGGCCCTGAAGTTATTCGAAGAGATGGTTGAAAAAGGCATCAAGCCGAACGTGGTCACATACAATACGCTGATTGATGGCTTATGTAAAGCGGGTAAGCTGGATGAGGCCTTAAAACTGTTTGAGGAAATGGTGGAGAAGGGCATTAAACCGGACGTGGTTACATATGTCTTC
pL_2	SCD	C	A	GAAGACATCATACAACACCCTGATTGATGGCTTATGCAAAGCGGGTAAGCTGGATGAAGCGTTAAAACTGTTTGAGGAAATGGTGGAGAAGGGTATTAAACCGAGCGTGGTCACATACACCACGCTGATCGATGGTCTGTGTAAGGCCGGCAAATTAGATGAGGCCCTGAAGTTATTCGAAGAGATGGTTGAAAAAGGCATCAAGCCGAACGTGGTTACATATGTCTTC
pL_2	SCD	C	C	GAAGACATCATACAACACCCTGATTGATGGCTTATGCAAAGCGGGTAAGCTGGATGAAGCGTTAAAACTGTTTGAGGAAATGGTGGAGAAGGGTATTAAACCGAGCGTGGTCACATACAACACCCTGATTGATGGCTTATGCAAAGCGGGTAAGCTGGATGAAGCGTTAAAACTGTTTGAGGAAATGGTGGAGAAGGGTATTAAACCGAGCGTGGTTACATATGTCTTC
pL_2	SCD	C	G	GAAGACATCATACAACACCCTGATTGATGGCTTATGCAAAGCGGGTAAGCTGGATGAAGCGTTAAAACTGTTTGAGGAAATGGTGGAGAAGGGTATTAAACCGAGCGTGGTCACATACACCACGCTGATCGATGGTCTGTGTAAGGCCGGTAAATTAGATGAAGCGCTGAAGTTATTCGAAGAGATGGTTGAAAAAGGTATCAAGCCGGACGTGGTTACATATGTCTTC
pL_2	SCD	C	U	GAAGACATCATACAACACCCTGATTGATGGCTTATGCAAAGCGGGTAAGCTGGATGAAGCGTTAAAACTGTTTGAGGAAATGGTGGAGAAGGGTATTAAACCGAGCGTGGTCACATACAATACGCTGATTGATGGCTTATGTAAAGCGGGTAAGCTGGATGAGGCCTTAAAACTGTTTGAGGAAATGGTGGAGAAGGGCATTAAACCGGACGTGGTTACATATGTCTTC
pL_2	SCD	G	A	GAAGACATCATACACCACGCTGATCGATGGTCTGTGTAAGGCCGGTAAATTAGATGAAGCGCTGAAGTTATTCGAAGAGATGGTTGAAAAAGGTATCAAGCCGGATGTGGTCACATACACCACGCTGATCGATGGTCTGTGTAAGGCCGGCAAATTAGATGAGGCCCTGAAGTTATTCGAAGAGATGGTTGAAAAAGGCATCAAGCCGAACGTGGTTACATATGTCTTC
pL_2	SCD	G	C	GAAGACATCATACACCACGCTGATCGATGGTCTGTGTAAGGCCGGTAAATTAGATGAAGCGCTGAAGTTATTCGAAGAGATGGTTGAAAAAGGTATCAAGCCGGATGTGGTCACATACAACACCCTGATTGATGGCTTATGCAAAGCGGGTAAGCTGGATGAAGCGTTAAAACTGTTTGAGGAAATGGTGGAGAAGGGTATTAAACCGAGCGTGGTTACATATGTCTTC
pL_2	SCD	G	G	GAAGACATCATACACCACGCTGATCGATGGTCTGTGTAAGGCCGGTAAATTAGATGAAGCGCTGAAGTTATTCGAAGAGATGGTTGAAAAAGGTATCAAGCCGGATGTGGTCACATACACCACGCTGATCGATGGTCTGTGTAAGGCCGGTAAATTAGATGAAGCGCTGAAGTTATTCGAAGAGATGGTTGAAAAAGGTATCAAGCCGGACGTGGTTACATATGTCTTC
pL_2	SCD	G	U	GAAGACATCATACACCACGCTGATCGATGGTCTGTGTAAGGCCGGTAAATTAGATGAAGCGCTGAAGTTATTCGAAGAGATGGTTGAAAAAGGTATCAAGCCGGATGTGGTCACATACAATACGCTGATTGATGGCTTATGTAAAGCGGGTAAGCTGGATGAGGCCTTAAAACTGTTTGAGGAAATGGTGGAGAAGGGCATTAAACCGGACGTGGTTACATATGTCTTC
pL_2	SCD	U	A	GAAGACATCATACAATACGCTGATTGATGGCTTATGTAAAGCGGGTAAGCTGGATGAGGCCTTAAAACTGTTTGAGGAAATGGTGGAGAAGGGCATTAAACCGGATGTGGTCACATACACCACGCTGATCGATGGTCTGTGTAAGGCCGGCAAATTAGATGAGGCCCTGAAGTTATTCGAAGAGATGGTTGAAAAAGGCATCAAGCCGAACGTGGTTACATATGTCTTC
pL_2	SCD	U	C	GAAGACATCATACAATACGCTGATTGATGGCTTATGTAAAGCGGGTAAGCTGGATGAGGCCTTAAAACTGTTTGAGGAAATGGTGGAGAAGGGCATTAAACCGGATGTGGTCACATACAACACCCTGATTGATGGCTTATGCAAAGCGGGTAAGCTGGATGAAGCGTTAAAACTGTTTGAGGAAATGGTGGAGAAGGGTATTAAACCGAGCGTGGTTACATATGTCTTC
pL_2	SCD	U	G	GAAGACATCATACAATACGCTGATTGATGGCTTATGTAAAGCGGGTAAGCTGGATGAGGCCTTAAAACTGTTTGAGGAAATGGTGGAGAAGGGCATTAAACCGGATGTGGTCACATACACCACGCTGATCGATGGTCTGTGTAAGGCCGGTAAATTAGATGAAGCGCTGAAGTTATTCGAAGAGATGGTTGAAAAAGGTATCAAGCCGGACGTGGTTACATATGTCTTC
pL_2	SCD	U	U	GAAGACATCATACAATACGCTGATTGATGGCTTATGTAAAGCGGGTAAGCTGGATGAGGCCTTAAAACTGTTTGAGGAAATGGTGGAGAAGGGCATTAAACCGGATGTGGTCACATACAATACGCTGATTGATGGCTTATGTAAAGCGGGTAAGCTGGATGAGGCCTTAAAACTGTTTGAGGAAATGGTGGAGAAGGGCATTAAACCGGACGTGGTTACATATGTCTTC
pL_3	SCD	A	A	GAAGACATACATACACCACGCTGATCGATGGTCTGTGTAAGGCCGGCAAATTAGATGAGGCCCTGAAGTTATTCGAAGAGATGGTTGAAAAAGGCATCAAGCCGAACGTGGTCACATACACCACGCTGATCGATGGTCTGTGTAAGGCCGGCAAATTAGATGAGGCCCTGAAGTTATTCGAAGAGATGGTTGAAAAAGGCATCAAGCCGAACGTGGTTACAATGTCTTC
pL_3	SCD	A	C	GAAGACATACATACACCACGCTGATCGATGGTCTGTGTAAGGCCGGCAAATTAGATGAGGCCCTGAAGTTATTCGAAGAGATGGTTGAAAAAGGCATCAAGCCGAACGTGGTCACATACAACACCCTGATTGATGGCTTATGCAAAGCGGGTAAGCTGGATGAAGCGTTAAAACTGTTTGAGGAAATGGTGGAGAAGGGTATTAAACCGAGCGTGGTTACAATGTCTTC
pL_3	SCD	A	G	GAAGACATACATACACCACGCTGATCGATGGTCTGTGTAAGGCCGGCAAATTAGATGAGGCCCTGAAGTTATTCGAAGAGATGGTTGAAAAAGGCATCAAGCCGAACGTGGTCACATACACCACGCTGATCGATGGTCTGTGTAAGGCCGGTAAATTAGATGAAGCGCTGAAGTTATTCGAAGAGATGGTTGAAAAAGGTATCAAGCCGGACGTGGTTACAATGTCTTC
pL_3	SCD	A	U	GAAGACATACATACACCACGCTGATCGATGGTCTGTGTAAGGCCGGCAAATTAGATGAGGCCCTGAAGTTATTCGAAGAGATGGTTGAAAAAGGCATCAAGCCGAACGTGGTCACATACAATACGCTGATTGATGGCTTATGTAAAGCGGGTAAGCTGGATGAGGCCTTAAAACTGTTTGAGGAAATGGTGGAGAAGGGCATTAAACCGGACGTGGTTACAATGTCTTC
pL_3	SCD	C	A	GAAGACATACATACAACACCCTGATTGATGGCTTATGCAAAGCGGGTAAGCTGGATGAAGCGTTAAAACTGTTTGAGGAAATGGTGGAGAAGGGTATTAAACCGAGCGTGGTCACATACACCACGCTGATCGATGGTCTGTGTAAGGCCGGCAAATTAGATGAGGCCCTGAAGTTATTCGAAGAGATGGTTGAAAAAGGCATCAAGCCGAACGTGGTTACAATGTCTTC
pL_3	SCD	C	C	GAAGACATACATACAACACCCTGATTGATGGCTTATGCAAAGCGGGTAAGCTGGATGAAGCGTTAAAACTGTTTGAGGAAATGGTGGAGAAGGGTATTAAACCGAGCGTGGTCACATACAACACCCTGATTGATGGCTTATGCAAAGCGGGTAAGCTGGATGAAGCGTTAAAACTGTTTGAGGAAATGGTGGAGAAGGGTATTAAACCGAGCGTGGTTACAATGTCTTC
pL_3	SCD	C	G	GAAGACATACATACAACACCCTGATTGATGGCTTATGCAAAGCGGGTAAGCTGGATGAAGCGTTAAAACTGTTTGAGGAAATGGTGGAGAAGGGTATTAAACCGAGCGTGGTCACATACACCACGCTGATCGATGGTCTGTGTAAGGCCGGTAAATTAGATGAAGCGCTGAAGTTATTCGAAGAGATGGTTGAAAAAGGTATCAAGCCGGACGTGGTTACAATGTCTTC
pL_3	SCD	C	U	GAAGACATACATACAACACCCTGATTGATGGCTTATGCAAAGCGGGTAAGCTGGATGAAGCGTTAAAACTGTTTGAGGAAATGGTGGAGAAGGGTATTAAACCGAGCGTGGTCACATACAATACGCTGATTGATGGCTTATGTAAAGCGGGTAAGCTGGATGAGGCCTTAAAACTGTTTGAGGAAATGGTGGAGAAGGGCATTAAACCGGACGTGGTTACAATGTCTTC
pL_3	SCD	G	A	GAAGACATACATACACCACGCTGATCGATGGTCTGTGTAAGGCCGGTAAATTAGATGAAGCGCTGAAGTTATTCGAAGAGATGGTTGAAAAAGGTATCAAGCCGGATGTGGTCACATACACCACGCTGATCGATGGTCTGTGTAAGGCCGGCAAATTAGATGAGGCCCTGAAGTTATTCGAAGAGATGGTTGAAAAAGGCATCAAGCCGAACGTGGTTACAATGTCTTC
pL_3	SCD	G	C	GAAGACATACATACACCACGCTGATCGATGGTCTGTGTAAGGCCGGTAAATTAGATGAAGCGCTGAAGTTATTCGAAGAGATGGTTGAAAAAGGTATCAAGCCGGATGTGGTCACATACAACACCCTGATTGATGGCTTATGCAAAGCGGGTAAGCTGGATGAAGCGTTAAAACTGTTTGAGGAAATGGTGGAGAAGGGTATTAAACCGAGCGTGGTTACAATGTCTTC
pL_3	SCD	G	G	GAAGACATACATACACCACGCTGATCGATGGTCTGTGTAAGGCCGGTAAATTAGATGAAGCGCTGAAGTTATTCGAAGAGATGGTTGAAAAAGGTATCAAGCCGGATGTGGTCACATACACCACGCTGATCGATGGTCTGTGTAAGGCCGGTAAATTAGATGAAGCGCTGAAGTTATTCGAAGAGATGGTTGAAAAAGGTATCAAGCCGGACGTGGTTACAATGTCTTC
pL_3	SCD	G	U	GAAGACATACATACACCACGCTGATCGATGGTCTGTGTAAGGCCGGTAAATTAGATGAAGCGCTGAAGTTATTCGAAGAGATGGTTGAAAAAGGTATCAAGCCGGATGTGGTCACATACAATACGCTGATTGATGGCTTATGTAAAGCGGGTAAGCTGGATGAGGCCTTAAAACTGTTTGAGGAAATGGTGGAGAAGGGCATTAAACCGGACGTGGTTACAATGTCTTC
pL_3	SCD	U	A	GAAGACATACATACAATACGCTGATTGATGGCTTATGTAAAGCGGGTAAGCTGGATGAGGCCTTAAAACTGTTTGAGGAAATGGTGGAGAAGGGCATTAAACCGGATGTGGTCACATACACCACGCTGATCGATGGTCTGTGTAAGGCCGGCAAATTAGATGAGGCCCTGAAGTTATTCGAAGAGATGGTTGAAAAAGGCATCAAGCCGAACGTGGTTACAATGTCTTC
pL_3	SCD	U	C	GAAGACATACATACAATACGCTGATTGATGGCTTATGTAAAGCGGGTAAGCTGGATGAGGCCTTAAAACTGTTTGAGGAAATGGTGGAGAAGGGCATTAAACCGGATGTGGTCACATACAACACCCTGATTGATGGCTTATGCAAAGCGGGTAAGCTGGATGAAGCGTTAAAACTGTTTGAGGAAATGGTGGAGAAGGGTATTAAACCGAGCGTGGTTACAATGTCTTC
pL_3	SCD	U	G	GAAGACATACATACAATACGCTGATTGATGGCTTATGTAAAGCGGGTAAGCTGGATGAGGCCTTAAAACTGTTTGAGGAAATGGTGGAGAAGGGCATTAAACCGGATGTGGTCACATACACCACGCTGATCGATGGTCTGTGTAAGGCCGGTAAATTAGATGAAGCGCTGAAGTTATTCGAAGAGATGGTTGAAAAAGGTATCAAGCCGGACGTGGTTACAATGTCTTC
pL_3	SCD	U	U	GAAGACATACATACAATACGCTGATTGATGGCTTATGTAAAGCGGGTAAGCTGGATGAGGCCTTAAAACTGTTTGAGGAAATGGTGGAGAAGGGCATTAAACCGGATGTGGTCACATACAATACGCTGATTGATGGCTTATGTAAAGCGGGTAAGCTGGATGAGGCCTTAAAACTGTTTGAGGAAATGGTGGAGAAGGGCATTAAACCGGACGTGGTTACAATGTCTTC
pL_4	SCD	A	A	GAAGACATTACATACACCACGCTGATCGATGGTCTGTGTAAGGCCGGCAAATTAGATGAGGCCCTGAAGTTATTCGAAGAGATGGTTGAAAAAGGCATCAAGCCGAACGTGGTCACATACACCACGCTGATCGATGGTCTGTGTAAGGCCGGCAAATTAGATGAGGCCCTGAAGTTATTCGAAGAGATGGTTGAAAAAGGCATCAAGCCGAACGTGGTGACATGTCTTC
pL_4	SCD	A	C	GAAGACATTACATACACCACGCTGATCGATGGTCTGTGTAAGGCCGGCAAATTAGATGAGGCCCTGAAGTTATTCGAAGAGATGGTTGAAAAAGGCATCAAGCCGAACGTGGTCACATACAACACCCTGATTGATGGCTTATGCAAAGCGGGTAAGCTGGATGAAGCGTTAAAACTGTTTGAGGAAATGGTGGAGAAGGGTATTAAACCGAGCGTGGTGACATGTCTTC
pL_4	SCD	A	G	GAAGACATTACATACACCACGCTGATCGATGGTCTGTGTAAGGCCGGCAAATTAGATGAGGCCCTGAAGTTATTCGAAGAGATGGTTGAAAAAGGCATCAAGCCGAACGTGGTCACATACACCACGCTGATCGATGGTCTGTGTAAGGCCGGTAAATTAGATGAAGCGCTGAAGTTATTCGAAGAGATGGTTGAAAAAGGTATCAAGCCGGACGTGGTGACATGTCTTC
pL_4	SCD	A	U	GAAGACATTACATACACCACGCTGATCGATGGTCTGTGTAAGGCCGGCAAATTAGATGAGGCCCTGAAGTTATTCGAAGAGATGGTTGAAAAAGGCATCAAGCCGAACGTGGTCACATACAATACGCTGATTGATGGCTTATGTAAAGCGGGTAAGCTGGATGAGGCCTTAAAACTGTTTGAGGAAATGGTGGAGAAGGGCATTAAACCGGACGTGGTGACATGTCTTC
pL_4	SCD	C	A	GAAGACATTACATACAACACCCTGATTGATGGCTTATGCAAAGCGGGTAAGCTGGATGAAGCGTTAAAACTGTTTGAGGAAATGGTGGAGAAGGGTATTAAACCGAGCGTGGTCACATACACCACGCTGATCGATGGTCTGTGTAAGGCCGGCAAATTAGATGAGGCCCTGAAGTTATTCGAAGAGATGGTTGAAAAAGGCATCAAGCCGAACGTGGTGACATGTCTTC
pL_4	SCD	C	C	GAAGACATTACATACAACACCCTGATTGATGGCTTATGCAAAGCGGGTAAGCTGGATGAAGCGTTAAAACTGTTTGAGGAAATGGTGGAGAAGGGTATTAAACCGAGCGTGGTCACATACAACACCCTGATTGATGGCTTATGCAAAGCGGGTAAGCTGGATGAAGCGTTAAAACTGTTTGAGGAAATGGTGGAGAAGGGTATTAAACCGAGCGTGGTGACATGTCTTC
pL_4	SCD	C	G	GAAGACATTACATACAACACCCTGATTGATGGCTTATGCAAAGCGGGTAAGCTGGATGAAGCGTTAAAACTGTTTGAGGAAATGGTGGAGAAGGGTATTAAACCGAGCGTGGTCACATACACCACGCTGATCGATGGTCTGTGTAAGGCCGGTAAATTAGATGAAGCGCTGAAGTTATTCGAAGAGATGGTTGAAAAAGGTATCAAGCCGGACGTGGTGACATGTCTTC
pL_4	SCD	C	U	GAAGACATTACATACAACACCCTGATTGATGGCTTATGCAAAGCGGGTAAGCTGGATGAAGCGTTAAAACTGTTTGAGGAAATGGTGGAGAAGGGTATTAAACCGAGCGTGGTCACATACAATACGCTGATTGATGGCTTATGTAAAGCGGGTAAGCTGGATGAGGCCTTAAAACTGTTTGAGGAAATGGTGGAGAAGGGCATTAAACCGGACGTGGTGACATGTCTTC
pL_4	SCD	G	A	GAAGACATTACATACACCACGCTGATCGATGGTCTGTGTAAGGCCGGTAAATTAGATGAAGCGCTGAAGTTATTCGAAGAGATGGTTGAAAAAGGTATCAAGCCGGATGTGGTCACATACACCACGCTGATCGATGGTCTGTGTAAGGCCGGCAAATTAGATGAGGCCCTGAAGTTATTCGAAGAGATGGTTGAAAAAGGCATCAAGCCGAACGTGGTGACATGTCTTC
pL_4	SCD	G	C	GAAGACATTACATACACCACGCTGATCGATGGTCTGTGTAAGGCCGGTAAATTAGATGAAGCGCTGAAGTTATTCGAAGAGATGGTTGAAAAAGGTATCAAGCCGGATGTGGTCACATACAACACCCTGATTGATGGCTTATGCAAAGCGGGTAAGCTGGATGAAGCGTTAAAACTGTTTGAGGAAATGGTGGAGAAGGGTATTAAACCGAGCGTGGTGACATGTCTTC
pL_4	SCD	G	G	GAAGACATTACATACACCACGCTGATCGATGGTCTGTGTAAGGCCGGTAAATTAGATGAAGCGCTGAAGTTATTCGAAGAGATGGTTGAAAAAGGTATCAAGCCGGATGTGGTCACATACACCACGCTGATCGATGGTCTGTGTAAGGCCGGTAAATTAGATGAAGCGCTGAAGTTATTCGAAGAGATGGTTGAAAAAGGTATCAAGCCGGACGTGGTGACATGTCTTC
pL_4	SCD	G	U	GAAGACATTACATACACCACGCTGATCGATGGTCTGTGTAAGGCCGGTAAATTAGATGAAGCGCTGAAGTTATTCGAAGAGATGGTTGAAAAAGGTATCAAGCCGGATGTGGTCACATACAATACGCTGATTGATGGCTTATGTAAAGCGGGTAAGCTGGATGAGGCCTTAAAACTGTTTGAGGAAATGGTGGAGAAGGGCATTAAACCGGACGTGGTGACATGTCTTC
pL_4	SCD	U	A	GAAGACATTACATACAATACGCTGATTGATGGCTTATGTAAAGCGGGTAAGCTGGATGAGGCCTTAAAACTGTTTGAGGAAATGGTGGAGAAGGGCATTAAACCGGATGTGGTCACATACACCACGCTGATCGATGGTCTGTGTAAGGCCGGCAAATTAGATGAGGCCCTGAAGTTATTCGAAGAGATGGTTGAAAAAGGCATCAAGCCGAACGTGGTGACATGTCTTC
pL_4	SCD	U	C	GAAGACATTACATACAATACGCTGATTGATGGCTTATGTAAAGCGGGTAAGCTGGATGAGGCCTTAAAACTGTTTGAGGAAATGGTGGAGAAGGGCATTAAACCGGATGTGGTCACATACAACACCCTGATTGATGGCTTATGCAAAGCGGGTAAGCTGGATGAAGCGTTAAAACTGTTTGAGGAAATGGTGGAGAAGGGTATTAAACCGAGCGTGGTGACATGTCTTC
pL_4	SCD	U	G	GAAGACATTACATACAATACGCTGATTGATGGCTTATGTAAAGCGGGTAAGCTGGATGAGGCCTTAAAACTGTTTGAGGAAATGGTGGAGAAGGGCATTAAACCGGATGTGGTCACATACACCACGCTGATCGATGGTCTGTGTAAGGCCGGTAAATTAGATGAAGCGCTGAAGTTATTCGAAGAGATGGTTGAAAAAGGTATCAAGCCGGACGTGGTGACATGTCTTC
pL_4	SCD	U	U	GAAGACATTACATACAATACGCTGATTGATGGCTTATGTAAAGCGGGTAAGCTGGATGAGGCCTTAAAACTGTTTGAGGAAATGGTGGAGAAGGGCATTAAACCGGATGTGGTCACATACAATACGCTGATTGATGGCTTATGTAAAGCGGGTAAGCTGGATGAGGCCTTAAAACTGTTTGAGGAAATGGTGGAGAAGGGCATTAAACCGGACGTGGTGACATGTCTTC
pL_5	SCD	A	A	GAAGACATTGACATACACCACGCTGATCGATGGTCTGTGTAAGGCCGGCAAATTAGATGAGGCCCTGAAGTTATTCGAAGAGATGGTTGAAAAAGGCATCAAGCCGAACGTGGTCACATACACCACGCTGATCGATGGTCTGTGTAAGGCCGGCAAATTAGATGAGGCCCTGAAGTTATTCGAAGAGATGGTTGAAAAAGGCATCAAGCCGAACGTGGTTAATGTCTTC
pL_5	SCD	A	C	GAAGACATTGACATACACCACGCTGATCGATGGTCTGTGTAAGGCCGGCAAATTAGATGAGGCCCTGAAGTTATTCGAAGAGATGGTTGAAAAAGGCATCAAGCCGAACGTGGTCACATACAACACCCTGATTGATGGCTTATGCAAAGCGGGTAAGCTGGATGAAGCGTTAAAACTGTTTGAGGAAATGGTGGAGAAGGGTATTAAACCGAGCGTGGTTAATGTCTTC
pL_5	SCD	A	G	GAAGACATTGACATACACCACGCTGATCGATGGTCTGTGTAAGGCCGGCAAATTAGATGAGGCCCTGAAGTTATTCGAAGAGATGGTTGAAAAAGGCATCAAGCCGAACGTGGTCACATACACCACGCTGATCGATGGTCTGTGTAAGGCCGGTAAATTAGATGAAGCGCTGAAGTTATTCGAAGAGATGGTTGAAAAAGGTATCAAGCCGGACGTGGTTAATGTCTTC
pL_5	SCD	A	U	GAAGACATTGACATACACCACGCTGATCGATGGTCTGTGTAAGGCCGGCAAATTAGATGAGGCCCTGAAGTTATTCGAAGAGATGGTTGAAAAAGGCATCAAGCCGAACGTGGTCACATACAATACGCTGATTGATGGCTTATGTAAAGCGGGTAAGCTGGATGAGGCCTTAAAACTGTTTGAGGAAATGGTGGAGAAGGGCATTAAACCGGACGTGGTTAATGTCTTC
pL_5	SCD	C	A	GAAGACATTGACATACAACACCCTGATTGATGGCTTATGCAAAGCGGGTAAGCTGGATGAAGCGTTAAAACTGTTTGAGGAAATGGTGGAGAAGGGTATTAAACCGAGCGTGGTCACATACACCACGCTGATCGATGGTCTGTGTAAGGCCGGCAAATTAGATGAGGCCCTGAAGTTATTCGAAGAGATGGTTGAAAAAGGCATCAAGCCGAACGTGGTTAATGTCTTC
pL_5	SCD	C	C	GAAGACATTGACATACAACACCCTGATTGATGGCTTATGCAAAGCGGGTAAGCTGGATGAAGCGTTAAAACTGTTTGAGGAAATGGTGGAGAAGGGTATTAAACCGAGCGTGGTCACATACAACACCCTGATTGATGGCTTATGCAAAGCGGGTAAGCTGGATGAAGCGTTAAAACTGTTTGAGGAAATGGTGGAGAAGGGTATTAAACCGAGCGTGGTTAATGTCTTC
pL_5	SCD	C	G	GAAGACATTGACATACAACACCCTGATTGATGGCTTATGCAAAGCGGGTAAGCTGGATGAAGCGTTAAAACTGTTTGAGGAAATGGTGGAGAAGGGTATTAAACCGAGCGTGGTCACATACACCACGCTGATCGATGGTCTGTGTAAGGCCGGTAAATTAGATGAAGCGCTGAAGTTATTCGAAGAGATGGTTGAAAAAGGTATCAAGCCGGACGTGGTTAATGTCTTC
pL_5	SCD	C	U	GAAGACATTGACATACAACACCCTGATTGATGGCTTATGCAAAGCGGGTAAGCTGGATGAAGCGTTAAAACTGTTTGAGGAAATGGTGGAGAAGGGTATTAAACCGAGCGTGGTCACATACAATACGCTGATTGATGGCTTATGTAAAGCGGGTAAGCTGGATGAGGCCTTAAAACTGTTTGAGGAAATGGTGGAGAAGGGCATTAAACCGGACGTGGTTAATGTCTTC
pL_5	SCD	G	A	GAAGACATTGACATACACCACGCTGATCGATGGTCTGTGTAAGGCCGGTAAATTAGATGAAGCGCTGAAGTTATTCGAAGAGATGGTTGAAAAAGGTATCAAGCCGGATGTGGTCACATACACCACGCTGATCGATGGTCTGTGTAAGGCCGGCAAATTAGATGAGGCCCTGAAGTTATTCGAAGAGATGGTTGAAAAAGGCATCAAGCCGAACGTGGTTAATGTCTTC
pL_5	SCD	G	C	GAAGACATTGACATACACCACGCTGATCGATGGTCTGTGTAAGGCCGGTAAATTAGATGAAGCGCTGAAGTTATTCGAAGAGATGGTTGAAAAAGGTATCAAGCCGGATGTGGTCACATACAACACCCTGATTGATGGCTTATGCAAAGCGGGTAAGCTGGATGAAGCGTTAAAACTGTTTGAGGAAATGGTGGAGAAGGGTATTAAACCGAGCGTGGTTAATGTCTTC
pL_5	SCD	G	G	GAAGACATTGACATACACCACGCTGATCGATGGTCTGTGTAAGGCCGGTAAATTAGATGAAGCGCTGAAGTTATTCGAAGAGATGGTTGAAAAAGGTATCAAGCCGGATGTGGTCACATACACCACGCTGATCGATGGTCTGTGTAAGGCCGGTAAATTAGATGAAGCGCTGAAGTTATTCGAAGAGATGGTTGAAAAAGGTATCAAGCCGGACGTGGTTAATGTCTTC
pL_5	SCD	G	U	GAAGACATTGACATACACCACGCTGATCGATGGTCTGTGTAAGGCCGGTAAATTAGATGAAGCGCTGAAGTTATTCGAAGAGATGGTTGAAAAAGGTATCAAGCCGGATGTGGTCACATACAATACGCTGATTGATGGCTTATGTAAAGCGGGTAAGCTGGATGAGGCCTTAAAACTGTTTGAGGAAATGGTGGAGAAGGGCATTAAACCGGACGTGGTTAATGTCTTC
pL_5	SCD	U	A	GAAGACATTGACATACAATACGCTGATTGATGGCTTATGTAAAGCGGGTAAGCTGGATGAGGCCTTAAAACTGTTTGAGGAAATGGTGGAGAAGGGCATTAAACCGGATGTGGTCACATACACCACGCTGATCGATGGTCTGTGTAAGGCCGGCAAATTAGATGAGGCCCTGAAGTTATTCGAAGAGATGGTTGAAAAAGGCATCAAGCCGAACGTGGTTAATGTCTTC
pL_5	SCD	U	C	GAAGACATTGACATACAATACGCTGATTGATGGCTTATGTAAAGCGGGTAAGCTGGATGAGGCCTTAAAACTGTTTGAGGAAATGGTGGAGAAGGGCATTAAACCGGATGTGGTCACATACAACACCCTGATTGATGGCTTATGCAAAGCGGGTAAGCTGGATGAAGCGTTAAAACTGTTTGAGGAAATGGTGGAGAAGGGTATTAAACCGAGCGTGGTTAATGTCTTC
pL_5	SCD	U	G	GAAGACATTGACATACAATACGCTGATTGATGGCTTATGTAAAGCGGGTAAGCTGGATGAGGCCTTAAAACTGTTTGAGGAAATGGTGGAGAAGGGCATTAAACCGGATGTGGTCACATACACCACGCTGATCGATGGTCTGTGTAAGGCCGGTAAATTAGATGAAGCGCTGAAGTTATTCGAAGAGATGGTTGAAAAAGGTATCAAGCCGGACGTGGTTAATGTCTTC
pL_5	SCD	U	U	GAAGACATTGACATACAATACGCTGATTGATGGCTTATGTAAAGCGGGTAAGCTGGATGAGGCCTTAAAACTGTTTGAGGAAATGGTGGAGAAGGGCATTAAACCGGATGTGGTCACATACAATACGCTGATTGATGGCTTATGTAAAGCGGGTAAGCTGGATGAGGCCTTAAAACTGTTTGAGGAAATGGTGGAGAAGGGCATTAAACCGGACGTGGTTAATGTCTTC
pL_6	SCD	A	A	GAAGACATGTTACATACACCACGCTGATCGATGGTCTGTGTAAGGCCGGCAAATTAGATGAGGCCCTGAAGTTATTCGAAGAGATGGTTGAAAAAGGCATCAAGCCGAACGTGGTCACATACACCACGCTGATCGATGGTCTGTGTAAGGCCGGCAAATTAGATGAGGCCCTGAAGTTATTCGAAGAGATGGTTGAAAAAGGCATCAAGCCGAACGTGGTCATGTCTTC
pL_6	SCD	A	C	GAAGACATGTTACATACACCACGCTGATCGATGGTCTGTGTAAGGCCGGCAAATTAGATGAGGCCCTGAAGTTATTCGAAGAGATGGTTGAAAAAGGCATCAAGCCGAACGTGGTCACATACAACACCCTGATTGATGGCTTATGCAAAGCGGGTAAGCTGGATGAAGCGTTAAAACTGTTTGAGGAAATGGTGGAGAAGGGTATTAAACCGAGCGTGGTCATGTCTTC
pL_6	SCD	A	G	GAAGACATGTTACATACACCACGCTGATCGATGGTCTGTGTAAGGCCGGCAAATTAGATGAGGCCCTGAAGTTATTCGAAGAGATGGTTGAAAAAGGCATCAAGCCGAACGTGGTCACATACACCACGCTGATCGATGGTCTGTGTAAGGCCGGTAAATTAGATGAAGCGCTGAAGTTATTCGAAGAGATGGTTGAAAAAGGTATCAAGCCGGACGTGGTCATGTCTTC
pL_6	SCD	A	U	GAAGACATGTTACATACACCACGCTGATCGATGGTCTGTGTAAGGCCGGCAAATTAGATGAGGCCCTGAAGTTATTCGAAGAGATGGTTGAAAAAGGCATCAAGCCGAACGTGGTCACATACAATACGCTGATTGATGGCTTATGTAAAGCGGGTAAGCTGGATGAGGCCTTAAAACTGTTTGAGGAAATGGTGGAGAAGGGCATTAAACCGGACGTGGTCATGTCTTC
pL_6	SCD	C	A	GAAGACATGTTACATACAACACCCTGATTGATGGCTTATGCAAAGCGGGTAAGCTGGATGAAGCGTTAAAACTGTTTGAGGAAATGGTGGAGAAGGGTATTAAACCGAGCGTGGTCACATACACCACGCTGATCGATGGTCTGTGTAAGGCCGGCAAATTAGATGAGGCCCTGAAGTTATTCGAAGAGATGGTTGAAAAAGGCATCAAGCCGAACGTGGTCATGTCTTC
pL_6	SCD	C	C	GAAGACATGTTACATACAACACCCTGATTGATGGCTTATGCAAAGCGGGTAAGCTGGATGAAGCGTTAAAACTGTTTGAGGAAATGGTGGAGAAGGGTATTAAACCGAGCGTGGTCACATACAACACCCTGATTGATGGCTTATGCAAAGCGGGTAAGCTGGATGAAGCGTTAAAACTGTTTGAGGAAATGGTGGAGAAGGGTATTAAACCGAGCGTGGTCATGTCTTC
pL_6	SCD	C	G	GAAGACATGTTACATACAACACCCTGATTGATGGCTTATGCAAAGCGGGTAAGCTGGATGAAGCGTTAAAACTGTTTGAGGAAATGGTGGAGAAGGGTATTAAACCGAGCGTGGTCACATACACCACGCTGATCGATGGTCTGTGTAAGGCCGGTAAATTAGATGAAGCGCTGAAGTTATTCGAAGAGATGGTTGAAAAAGGTATCAAGCCGGACGTGGTCATGTCTTC
pL_6	SCD	C	U	GAAGACATGTTACATACAACACCCTGATTGATGGCTTATGCAAAGCGGGTAAGCTGGATGAAGCGTTAAAACTGTTTGAGGAAATGGTGGAGAAGGGTATTAAACCGAGCGTGGTCACATACAATACGCTGATTGATGGCTTATGTAAAGCGGGTAAGCTGGATGAGGCCTTAAAACTGTTTGAGGAAATGGTGGAGAAGGGCATTAAACCGGACGTGGTCATGTCTTC
pL_6	SCD	G	A	GAAGACATGTTACATACACCACGCTGATCGATGGTCTGTGTAAGGCCGGTAAATTAGATGAAGCGCTGAAGTTATTCGAAGAGATGGTTGAAAAAGGTATCAAGCCGGATGTGGTCACATACACCACGCTGATCGATGGTCTGTGTAAGGCCGGCAAATTAGATGAGGCCCTGAAGTTATTCGAAGAGATGGTTGAAAAAGGCATCAAGCCGAACGTGGTCATGTCTTC
pL_6	SCD	G	C	GAAGACATGTTACATACACCACGCTGATCGATGGTCTGTGTAAGGCCGGTAAATTAGATGAAGCGCTGAAGTTATTCGAAGAGATGGTTGAAAAAGGTATCAAGCCGGATGTGGTCACATACAACACCCTGATTGATGGCTTATGCAAAGCGGGTAAGCTGGATGAAGCGTTAAAACTGTTTGAGGAAATGGTGGAGAAGGGTATTAAACCGAGCGTGGTCATGTCTTC
pL_6	SCD	G	G	GAAGACATGTTACATACACCACGCTGATCGATGGTCTGTGTAAGGCCGGTAAATTAGATGAAGCGCTGAAGTTATTCGAAGAGATGGTTGAAAAAGGTATCAAGCCGGATGTGGTCACATACACCACGCTGATCGATGGTCTGTGTAAGGCCGGTAAATTAGATGAAGCGCTGAAGTTATTCGAAGAGATGGTTGAAAAAGGTATCAAGCCGGACGTGGTCATGTCTTC
pL_6	SCD	G	U	GAAGACATGTTACATACACCACGCTGATCGATGGTCTGTGTAAGGCCGGTAAATTAGATGAAGCGCTGAAGTTATTCGAAGAGATGGTTGAAAAAGGTATCAAGCCGGATGTGGTCACATACAATACGCTGATTGATGGCTTATGTAAAGCGGGTAAGCTGGATGAGGCCTTAAAACTGTTTGAGGAAATGGTGGAGAAGGGCATTAAACCGGACGTGGTCATGTCTTC
pL_6	SCD	U	A	GAAGACATGTTACATACAATACGCTGATTGATGGCTTATGTAAAGCGGGTAAGCTGGATGAGGCCTTAAAACTGTTTGAGGAAATGGTGGAGAAGGGCATTAAACCGGATGTGGTCACATACACCACGCTGATCGATGGTCTGTGTAAGGCCGGCAAATTAGATGAGGCCCTGAAGTTATTCGAAGAGATGGTTGAAAAAGGCATCAAGCCGAACGTGGTCATGTCTTC
pL_6	SCD	U	C	GAAGACATGTTACATACAATACGCTGATTGATGGCTTATGTAAAGCGGGTAAGCTGGATGAGGCCTTAAAACTGTTTGAGGAAATGGTGGAGAAGGGCATTAAACCGGATGTGGTCACATACAACACCCTGATTGATGGCTTATGCAAAGCGGGTAAGCTGGATGAAGCGTTAAAACTGTTTGAGGAAATGGTGGAGAAGGGTATTAAACCGAGCGTGGTCATGTCTTC
pL_6	SCD	U	G	GAAGACATGTTACATACAATACGCTGATTGATGGCTTATGTAAAGCGGGTAAGCTGGATGAGGCCTTAAAACTGTTTGAGGAAATGGTGGAGAAGGGCATTAAACCGGATGTGGTCACATACACCACGCTGATCGATGGTCTGTGTAAGGCCGGTAAATTAGATGAAGCGCTGAAGTTATTCGAAGAGATGGTTGAAAAAGGTATCAAGCCGGACGTGGTCATGTCTTC
pL_6	SCD	U	U	GAAGACATGTTACATACAATACGCTGATTGATGGCTTATGTAAAGCGGGTAAGCTGGATGAGGCCTTAAAACTGTTTGAGGAAATGGTGGAGAAGGGCATTAAACCGGATGTGGTCACATACAATACGCTGATTGATGGCTTATGTAAAGCGGGTAAGCTGGATGAGGCCTTAAAACTGTTTGAGGAAATGGTGGAGAAGGGCATTAAACCGGACGTGGTCATGTCTTC
pL_7	SCD	A	A	GAAGACATGGTCACATACACCACGCTGATCGATGGTCTGTGTAAGGCCGGCAAATTAGATGAGGCCCTGAAGTTATTCGAAGAGATGGTTGAAAAAGGCATCAAGCCGAACGTGGTCACATACACCACGCTGATCGATGGTCTGTGTAAGGCCGGCAAATTAGATGAGGCCCTGAAGTTATTCGAAGAGATGGTTGAAAAAGGCATCAAGCCGAACGTGGTATGTCTTC
pL_7	SCD	A	C	GAAGACATGGTCACATACACCACGCTGATCGATGGTCTGTGTAAGGCCGGCAAATTAGATGAGGCCCTGAAGTTATTCGAAGAGATGGTTGAAAAAGGCATCAAGCCGAACGTGGTCACATACAACACCCTGATTGATGGCTTATGCAAAGCGGGTAAGCTGGATGAAGCGTTAAAACTGTTTGAGGAAATGGTGGAGAAGGGTATTAAACCGAGCGTGGTATGTCTTC
pL_7	SCD	A	G	GAAGACATGGTCACATACACCACGCTGATCGATGGTCTGTGTAAGGCCGGCAAATTAGATGAGGCCCTGAAGTTATTCGAAGAGATGGTTGAAAAAGGCATCAAGCCGAACGTGGTCACATACACCACGCTGATCGATGGTCTGTGTAAGGCCGGTAAATTAGATGAAGCGCTGAAGTTATTCGAAGAGATGGTTGAAAAAGGTATCAAGCCGGACGTGGTATGTCTTC
pL_7	SCD	A	U	GAAGACATGGTCACATACACCACGCTGATCGATGGTCTGTGTAAGGCCGGCAAATTAGATGAGGCCCTGAAGTTATTCGAAGAGATGGTTGAAAAAGGCATCAAGCCGAACGTGGTCACATACAATACGCTGATTGATGGCTTATGTAAAGCGGGTAAGCTGGATGAGGCCTTAAAACTGTTTGAGGAAATGGTGGAGAAGGGCATTAAACCGGACGTGGTATGTCTTC
pL_7	SCD	C	A	GAAGACATGGTCACATACAACACCCTGATTGATGGCTTATGCAAAGCGGGTAAGCTGGATGAAGCGTTAAAACTGTTTGAGGAAATGGTGGAGAAGGGTATTAAACCGAGCGTGGTCACATACACCACGCTGATCGATGGTCTGTGTAAGGCCGGCAAATTAGATGAGGCCCTGAAGTTATTCGAAGAGATGGTTGAAAAAGGCATCAAGCCGAACGTGGTATGTCTTC
pL_7	SCD	C	C	GAAGACATGGTCACATACAACACCCTGATTGATGGCTTATGCAAAGCGGGTAAGCTGGATGAAGCGTTAAAACTGTTTGAGGAAATGGTGGAGAAGGGTATTAAACCGAGCGTGGTCACATACAACACCCTGATTGATGGCTTATGCAAAGCGGGTAAGCTGGATGAAGCGTTAAAACTGTTTGAGGAAATGGTGGAGAAGGGTATTAAACCGAGCGTGGTATGTCTTC
pL_7	SCD	C	G	GAAGACATGGTCACATACAACACCCTGATTGATGGCTTATGCAAAGCGGGTAAGCTGGATGAAGCGTTAAAACTGTTTGAGGAAATGGTGGAGAAGGGTATTAAACCGAGCGTGGTCACATACACCACGCTGATCGATGGTCTGTGTAAGGCCGGTAAATTAGATGAAGCGCTGAAGTTATTCGAAGAGATGGTTGAAAAAGGTATCAAGCCGGACGTGGTATGTCTTC
pL_7	SCD	C	U	GAAGACATGGTCACATACAACACCCTGATTGATGGCTTATGCAAAGCGGGTAAGCTGGATGAAGCGTTAAAACTGTTTGAGGAAATGGTGGAGAAGGGTATTAAACCGAGCGTGGTCACATACAATACGCTGATTGATGGCTTATGTAAAGCGGGTAAGCTGGATGAGGCCTTAAAACTGTTTGAGGAAATGGTGGAGAAGGGCATTAAACCGGACGTGGTATGTCTTC
pL_7	SCD	G	A	GAAGACATGGTCACATACACCACGCTGATCGATGGTCTGTGTAAGGCCGGTAAATTAGATGAAGCGCTGAAGTTATTCGAAGAGATGGTTGAAAAAGGTATCAAGCCGGATGTGGTCACATACACCACGCTGATCGATGGTCTGTGTAAGGCCGGCAAATTAGATGAGGCCCTGAAGTTATTCGAAGAGATGGTTGAAAAAGGCATCAAGCCGAACGTGGTATGTCTTC
pL_7	SCD	G	C	GAAGACATGGTCACATACACCACGCTGATCGATGGTCTGTGTAAGGCCGGTAAATTAGATGAAGCGCTGAAGTTATTCGAAGAGATGGTTGAAAAAGGTATCAAGCCGGATGTGGTCACATACAACACCCTGATTGATGGCTTATGCAAAGCGGGTAAGCTGGATGAAGCGTTAAAACTGTTTGAGGAAATGGTGGAGAAGGGTATTAAACCGAGCGTGGTATGTCTTC
pL_7	SCD	G	G	GAAGACATGGTCACATACACCACGCTGATCGATGGTCTGTGTAAGGCCGGTAAATTAGATGAAGCGCTGAAGTTATTCGAAGAGATGGTTGAAAAAGGTATCAAGCCGGATGTGGTCACATACACCACGCTGATCGATGGTCTGTGTAAGGCCGGTAAATTAGATGAAGCGCTGAAGTTATTCGAAGAGATGGTTGAAAAAGGTATCAAGCCGGACGTGGTATGTCTTC
pL_7	SCD	G	U	GAAGACATGGTCACATACACCACGCTGATCGATGGTCTGTGTAAGGCCGGTAAATTAGATGAAGCGCTGAAGTTATTCGAAGAGATGGTTGAAAAAGGTATCAAGCCGGATGTGGTCACATACAATACGCTGATTGATGGCTTATGTAAAGCGGGTAAGCTGGATGAGGCCTTAAAACTGTTTGAGGAAATGGTGGAGAAGGGCATTAAACCGGACGTGGTATGTCTTC
pL_7	SCD	U	A	GAAGACATGGTCACATACAATACGCTGATTGATGGCTTATGTAAAGCGGGTAAGCTGGATGAGGCCTTAAAACTGTTTGAGGAAATGGTGGAGAAGGGCATTAAACCGGATGTGGTCACATACACCACGCTGATCGATGGTCTGTGTAAGGCCGGCAAATTAGATGAGGCCCTGAAGTTATTCGAAGAGATGGTTGAAAAAGGCATCAAGCCGAACGTGGTATGTCTTC
pL_7	SCD	U	C	GAAGACATGGTCACATACAATACGCTGATTGATGGCTTATGTAAAGCGGGTAAGCTGGATGAGGCCTTAAAACTGTTTGAGGAAATGGTGGAGAAGGGCATTAAACCGGATGTGGTCACATACAACACCCTGATTGATGGCTTATGCAAAGCGGGTAAGCTGGATGAAGCGTTAAAACTGTTTGAGGAAATGGTGGAGAAGGGTATTAAACCGAGCGTGGTATGTCTTC
pL_7	SCD	U	G	GAAGACATGGTCACATACAATACGCTGATTGATGGCTTATGTAAAGCGGGTAAGCTGGATGAGGCCTTAAAACTGTTTGAGGAAATGGTGGAGAAGGGCATTAAACCGGATGTGGTCACATACACCACGCTGATCGATGGTCTGTGTAAGGCCGGTAAATTAGATGAAGCGCTGAAGTTATTCGAAGAGATGGTTGAAAAAGGTATCAAGCCGGACGTGGTATGTCTTC
pL_7	SCD	U	U	GAAGACATGGTCACATACAATACGCTGATTGATGGCTTATGTAAAGCGGGTAAGCTGGATGAGGCCTTAAAACTGTTTGAGGAAATGGTGGAGAAGGGCATTAAACCGGATGTGGTCACATACAATACGCTGATTGATGGCTTATGTAAAGCGGGTAAGCTGGATGAGGCCTTAAAACTGTTTGAGGAAATGGTGGAGAAGGGCATTAAACCGGACGTGGTATGTCTTC
pL_8	SCD	A	A	GAAGACATTGGTTACATACACCACGCTGATCGATGGTCTGTGTAAGGCCGGCAAATTAGATGAGGCCCTGAAGTTATTCGAAGAGATGGTTGAAAAAGGCATCAAGCCGAACGTGGTCACATACACCACGCTGATCGATGGTCTGTGTAAGGCCGGCAAATTAGATGAGGCCCTGAAGTTATTCGAAGAGATGGTTGAAAAAGGCATCAAGCCGAACGTGGATGTCTTC
pL_8	SCD	A	C	GAAGACATTGGTTACATACACCACGCTGATCGATGGTCTGTGTAAGGCCGGCAAATTAGATGAGGCCCTGAAGTTATTCGAAGAGATGGTTGAAAAAGGCATCAAGCCGAACGTGGTCACATACAACACCCTGATTGATGGCTTATGCAAAGCGGGTAAGCTGGATGAAGCGTTAAAACTGTTTGAGGAAATGGTGGAGAAGGGTATTAAACCGAGCGTGGATGTCTTC
pL_8	SCD	A	G	GAAGACATTGGTTACATACACCACGCTGATCGATGGTCTGTGTAAGGCCGGCAAATTAGATGAGGCCCTGAAGTTATTCGAAGAGATGGTTGAAAAAGGCATCAAGCCGAACGTGGTCACATACACCACGCTGATCGATGGTCTGTGTAAGGCCGGTAAATTAGATGAAGCGCTGAAGTTATTCGAAGAGATGGTTGAAAAAGGTATCAAGCCGGACGTGGATGTCTTC
pL_8	SCD	A	U	GAAGACATTGGTTACATACACCACGCTGATCGATGGTCTGTGTAAGGCCGGCAAATTAGATGAGGCCCTGAAGTTATTCGAAGAGATGGTTGAAAAAGGCATCAAGCCGAACGTGGTCACATACAATACGCTGATTGATGGCTTATGTAAAGCGGGTAAGCTGGATGAGGCCTTAAAACTGTTTGAGGAAATGGTGGAGAAGGGCATTAAACCGGACGTGGATGTCTTC
pL_8	SCD	C	A	GAAGACATTGGTTACATACAACACCCTGATTGATGGCTTATGCAAAGCGGGTAAGCTGGATGAAGCGTTAAAACTGTTTGAGGAAATGGTGGAGAAGGGTATTAAACCGAGCGTGGTCACATACACCACGCTGATCGATGGTCTGTGTAAGGCCGGCAAATTAGATGAGGCCCTGAAGTTATTCGAAGAGATGGTTGAAAAAGGCATCAAGCCGAACGTGGATGTCTTC
pL_8	SCD	C	C	GAAGACATTGGTTACATACAACACCCTGATTGATGGCTTATGCAAAGCGGGTAAGCTGGATGAAGCGTTAAAACTGTTTGAGGAAATGGTGGAGAAGGGTATTAAACCGAGCGTGGTCACATACAACACCCTGATTGATGGCTTATGCAAAGCGGGTAAGCTGGATGAAGCGTTAAAACTGTTTGAGGAAATGGTGGAGAAGGGTATTAAACCGAGCGTGGATGTCTTC
pL_8	SCD	C	G	GAAGACATTGGTTACATACAACACCCTGATTGATGGCTTATGCAAAGCGGGTAAGCTGGATGAAGCGTTAAAACTGTTTGAGGAAATGGTGGAGAAGGGTATTAAACCGAGCGTGGTCACATACACCACGCTGATCGATGGTCTGTGTAAGGCCGGTAAATTAGATGAAGCGCTGAAGTTATTCGAAGAGATGGTTGAAAAAGGTATCAAGCCGGACGTGGATGTCTTC
pL_8	SCD	C	U	GAAGACATTGGTTACATACAACACCCTGATTGATGGCTTATGCAAAGCGGGTAAGCTGGATGAAGCGTTAAAACTGTTTGAGGAAATGGTGGAGAAGGGTATTAAACCGAGCGTGGTCACATACAATACGCTGATTGATGGCTTATGTAAAGCGGGTAAGCTGGATGAGGCCTTAAAACTGTTTGAGGAAATGGTGGAGAAGGGCATTAAACCGGACGTGGATGTCTTC
pL_8	SCD	G	A	GAAGACATTGGTTACATACACCACGCTGATCGATGGTCTGTGTAAGGCCGGTAAATTAGATGAAGCGCTGAAGTTATTCGAAGAGATGGTTGAAAAAGGTATCAAGCCGGATGTGGTCACATACACCACGCTGATCGATGGTCTGTGTAAGGCCGGCAAATTAGATGAGGCCCTGAAGTTATTCGAAGAGATGGTTGAAAAAGGCATCAAGCCGAACGTGGATGTCTTC
pL_8	SCD	G	C	GAAGACATTGGTTACATACACCACGCTGATCGATGGTCTGTGTAAGGCCGGTAAATTAGATGAAGCGCTGAAGTTATTCGAAGAGATGGTTGAAAAAGGTATCAAGCCGGATGTGGTCACATACAACACCCTGATTGATGGCTTATGCAAAGCGGGTAAGCTGGATGAAGCGTTAAAACTGTTTGAGGAAATGGTGGAGAAGGGTATTAAACCGAGCGTGGATGTCTTC
pL_8	SCD	G	G	GAAGACATTGGTTACATACACCACGCTGATCGATGGTCTGTGTAAGGCCGGTAAATTAGATGAAGCGCTGAAGTTATTCGAAGAGATGGTTGAAAAAGGTATCAAGCCGGATGTGGTCACATACACCACGCTGATCGATGGTCTGTGTAAGGCCGGTAAATTAGATGAAGCGCTGAAGTTATTCGAAGAGATGGTTGAAAAAGGTATCAAGCCGGACGTGGATGTCTTC
pL_8	SCD	G	U	GAAGACATTGGTTACATACACCACGCTGATCGATGGTCTGTGTAAGGCCGGTAAATTAGATGAAGCGCTGAAGTTATTCGAAGAGATGGTTGAAAAAGGTATCAAGCCGGATGTGGTCACATACAATACGCTGATTGATGGCTTATGTAAAGCGGGTAAGCTGGATGAGGCCTTAAAACTGTTTGAGGAAATGGTGGAGAAGGGCATTAAACCGGACGTGGATGTCTTC
pL_8	SCD	U	A	GAAGACATTGGTTACATACAATACGCTGATTGATGGCTTATGTAAAGCGGGTAAGCTGGATGAGGCCTTAAAACTGTTTGAGGAAATGGTGGAGAAGGGCATTAAACCGGATGTGGTCACATACACCACGCTGATCGATGGTCTGTGTAAGGCCGGCAAATTAGATGAGGCCCTGAAGTTATTCGAAGAGATGGTTGAAAAAGGCATCAAGCCGAACGTGGATGTCTTC
pL_8	SCD	U	C	GAAGACATTGGTTACATACAATACGCTGATTGATGGCTTATGTAAAGCGGGTAAGCTGGATGAGGCCTTAAAACTGTTTGAGGAAATGGTGGAGAAGGGCATTAAACCGGATGTGGTCACATACAACACCCTGATTGATGGCTTATGCAAAGCGGGTAAGCTGGATGAAGCGTTAAAACTGTTTGAGGAAATGGTGGAGAAGGGTATTAAACCGAGCGTGGATGTCTTC
pL_8	SCD	U	G	GAAGACATTGGTTACATACAATACGCTGATTGATGGCTTATGTAAAGCGGGTAAGCTGGATGAGGCCTTAAAACTGTTTGAGGAAATGGTGGAGAAGGGCATTAAACCGGATGTGGTCACATACACCACGCTGATCGATGGTCTGTGTAAGGCCGGTAAATTAGATGAAGCGCTGAAGTTATTCGAAGAGATGGTTGAAAAAGGTATCAAGCCGGACGTGGATGTCTTC
pL_8	SCD	U	U	GAAGACATTGGTTACATACAATACGCTGATTGATGGCTTATGTAAAGCGGGTAAGCTGGATGAGGCCTTAAAACTGTTTGAGGAAATGGTGGAGAAGGGCATTAAACCGGATGTGGTCACATACAATACGCTGATTGATGGCTTATGTAAAGCGGGTAAGCTGGATGAGGCCTTAAAACTGTTTGAGGAAATGGTGGAGAAGGGCATTAAACCGGACGTGGATGTCTTC
pL_9	SCD	A	A	GAAGACATGTGGTGACATACACCACGCTGATCGATGGTCTGTGTAAGGCCGGCAAATTAGATGAGGCCCTGAAGTTATTCGAAGAGATGGTTGAAAAAGGCATCAAGCCGAACGTGGTCACATACACCACGCTGATCGATGGTCTGTGTAAGGCCGGCAAATTAGATGAGGCCCTGAAGTTATTCGAAGAGATGGTTGAAAAAGGCATCAAGCCGAACGAGCTGACGATGTCTTC
pL_9	SCD	A	C	GAAGACATGTGGTGACATACACCACGCTGATCGATGGTCTGTGTAAGGCCGGCAAATTAGATGAGGCCCTGAAGTTATTCGAAGAGATGGTTGAAAAAGGCATCAAGCCGAACGTGGTCACATACAACACCCTGATTGATGGCTTATGCAAAGCGGGTAAGCTGGATGAAGCGTTAAAACTGTTTGAGGAAATGGTGGAGAAGGGTATTAAACCGAGCGAGCTGACGATGTCTTC
pL_9	SCD	A	G	GAAGACATGTGGTGACATACACCACGCTGATCGATGGTCTGTGTAAGGCCGGCAAATTAGATGAGGCCCTGAAGTTATTCGAAGAGATGGTTGAAAAAGGCATCAAGCCGAACGTGGTCACATACACCACGCTGATCGATGGTCTGTGTAAGGCCGGTAAATTAGATGAAGCGCTGAAGTTATTCGAAGAGATGGTTGAAAAAGGTATCAAGCCGGACGAGCTGACGATGTCTTC
pL_9	SCD	A	U	GAAGACATGTGGTGACATACACCACGCTGATCGATGGTCTGTGTAAGGCCGGCAAATTAGATGAGGCCCTGAAGTTATTCGAAGAGATGGTTGAAAAAGGCATCAAGCCGAACGTGGTCACATACAATACGCTGATTGATGGCTTATGTAAAGCGGGTAAGCTGGATGAGGCCTTAAAACTGTTTGAGGAAATGGTGGAGAAGGGCATTAAACCGGACGAGCTGACGATGTCTTC
pL_9	SCD	C	A	GAAGACATGTGGTGACATACAACACCCTGATTGATGGCTTATGCAAAGCGGGTAAGCTGGATGAAGCGTTAAAACTGTTTGAGGAAATGGTGGAGAAGGGTATTAAACCGAGCGTGGTCACATACACCACGCTGATCGATGGTCTGTGTAAGGCCGGCAAATTAGATGAGGCCCTGAAGTTATTCGAAGAGATGGTTGAAAAAGGCATCAAGCCGAACGAGCTGACGATGTCTTC
pL_9	SCD	C	C	GAAGACATGTGGTGACATACAACACCCTGATTGATGGCTTATGCAAAGCGGGTAAGCTGGATGAAGCGTTAAAACTGTTTGAGGAAATGGTGGAGAAGGGTATTAAACCGAGCGTGGTCACATACAACACCCTGATTGATGGCTTATGCAAAGCGGGTAAGCTGGATGAAGCGTTAAAACTGTTTGAGGAAATGGTGGAGAAGGGTATTAAACCGAGCGAGCTGACGATGTCTTC
pL_9	SCD	C	G	GAAGACATGTGGTGACATACAACACCCTGATTGATGGCTTATGCAAAGCGGGTAAGCTGGATGAAGCGTTAAAACTGTTTGAGGAAATGGTGGAGAAGGGTATTAAACCGAGCGTGGTCACATACACCACGCTGATCGATGGTCTGTGTAAGGCCGGTAAATTAGATGAAGCGCTGAAGTTATTCGAAGAGATGGTTGAAAAAGGTATCAAGCCGGACGAGCTGACGATGTCTTC
pL_9	SCD	C	U	GAAGACATGTGGTGACATACAACACCCTGATTGATGGCTTATGCAAAGCGGGTAAGCTGGATGAAGCGTTAAAACTGTTTGAGGAAATGGTGGAGAAGGGTATTAAACCGAGCGTGGTCACATACAATACGCTGATTGATGGCTTATGTAAAGCGGGTAAGCTGGATGAGGCCTTAAAACTGTTTGAGGAAATGGTGGAGAAGGGCATTAAACCGGACGAGCTGACGATGTCTTC
pL_9	SCD	G	A	GAAGACATGTGGTGACATACACCACGCTGATCGATGGTCTGTGTAAGGCCGGTAAATTAGATGAAGCGCTGAAGTTATTCGAAGAGATGGTTGAAAAAGGTATCAAGCCGGATGTGGTCACATACACCACGCTGATCGATGGTCTGTGTAAGGCCGGCAAATTAGATGAGGCCCTGAAGTTATTCGAAGAGATGGTTGAAAAAGGCATCAAGCCGAACGAGCTGACGATGTCTTC
pL_9	SCD	G	C	GAAGACATGTGGTGACATACACCACGCTGATCGATGGTCTGTGTAAGGCCGGTAAATTAGATGAAGCGCTGAAGTTATTCGAAGAGATGGTTGAAAAAGGTATCAAGCCGGATGTGGTCACATACAACACCCTGATTGATGGCTTATGCAAAGCGGGTAAGCTGGATGAAGCGTTAAAACTGTTTGAGGAAATGGTGGAGAAGGGTATTAAACCGAGCGAGCTGACGATGTCTTC
pL_9	SCD	G	G	GAAGACATGTGGTGACATACACCACGCTGATCGATGGTCTGTGTAAGGCCGGTAAATTAGATGAAGCGCTGAAGTTATTCGAAGAGATGGTTGAAAAAGGTATCAAGCCGGATGTGGTCACATACACCACGCTGATCGATGGTCTGTGTAAGGCCGGTAAATTAGATGAAGCGCTGAAGTTATTCGAAGAGATGGTTGAAAAAGGTATCAAGCCGGACGAGCTGACGATGTCTTC
pL_9	SCD	G	U	GAAGACATGTGGTGACATACACCACGCTGATCGATGGTCTGTGTAAGGCCGGTAAATTAGATGAAGCGCTGAAGTTATTCGAAGAGATGGTTGAAAAAGGTATCAAGCCGGATGTGGTCACATACAATACGCTGATTGATGGCTTATGTAAAGCGGGTAAGCTGGATGAGGCCTTAAAACTGTTTGAGGAAATGGTGGAGAAGGGCATTAAACCGGACGAGCTGACGATGTCTTC
pL_9	SCD	U	A	GAAGACATGTGGTGACATACAATACGCTGATTGATGGCTTATGTAAAGCGGGTAAGCTGGATGAGGCCTTAAAACTGTTTGAGGAAATGGTGGAGAAGGGCATTAAACCGGATGTGGTCACATACACCACGCTGATCGATGGTCTGTGTAAGGCCGGCAAATTAGATGAGGCCCTGAAGTTATTCGAAGAGATGGTTGAAAAAGGCATCAAGCCGAACGAGCTGACGATGTCTTC
pL_9	SCD	U	C	GAAGACATGTGGTGACATACAATACGCTGATTGATGGCTTATGTAAAGCGGGTAAGCTGGATGAGGCCTTAAAACTGTTTGAGGAAATGGTGGAGAAGGGCATTAAACCGGATGTGGTCACATACAACACCCTGATTGATGGCTTATGCAAAGCGGGTAAGCTGGATGAAGCGTTAAAACTGTTTGAGGAAATGGTGGAGAAGGGTATTAAACCGAGCGAGCTGACGATGTCTTC
pL_9	SCD	U	G	GAAGACATGTGGTGACATACAATACGCTGATTGATGGCTTATGTAAAGCGGGTAAGCTGGATGAGGCCTTAAAACTGTTTGAGGAAATGGTGGAGAAGGGCATTAAACCGGATGTGGTCACATACACCACGCTGATCGATGGTCTGTGTAAGGCCGGTAAATTAGATGAAGCGCTGAAGTTATTCGAAGAGATGGTTGAAAAAGGTATCAAGCCGGACGAGCTGACGATGTCTTC
pL_9	SCD	U	U	GAAGACATGTGGTGACATACAATACGCTGATTGATGGCTTATGTAAAGCGGGTAAGCTGGATGAGGCCTTAAAACTGTTTGAGGAAATGGTGGAGAAGGGCATTAAACCGGATGTGGTCACATACAATACGCTGATTGATGGCTTATGTAAAGCGGGTAAGCTGGATGAGGCCTTAAAACTGTTTGAGGAAATGGTGGAGAAGGGCATTAAACCGGACGAGCTGACGATGTCTTC
pL_1	PPR2.0	A	A	GAAGACATAAACTCCGTGGTCACATACACCACACTGATCGACGGACTGTGTAAAGCCGGCGACGTGGACGAAGCCCTCGAGCTGTTCAAAGAGATGCGGAGCAAGGGCGTGAAGCCCAACGTGGTCACATACACCACACTGATCGACGGACTGTGTAAAGCCGGCGACGTGGACGAAGCCCTCGAGCTGTTCAAAGAGATGCGGAGCAAGGGCGTGAAGCCCAACGTGGTCACATAATGTCTTC
pL_1	PPR2.0	A	C	GAAGACATAAACTCCGTGGTCACATACACCACACTGATCGACGGACTGTGTAAAGCCGGCGACGTGGACGAAGCCCTCGAGCTGTTCAAAGAGATGCGGAGCAAGGGCGTGAAGCCCAACGTGGTCACATACAACACCCTGATCGACGGCCTGTGCAAGAGCGGCAAGATCGAGGAGGCCCTGAAGCTGTTCAAGGAGATGGAGGAGAAGGGCATCACCCCCAGCGTGGTCACATAATGTCTTC
pL_1	PPR2.0	A	G	GAAGACATAAACTCCGTGGTCACATACACCACACTGATCGACGGACTGTGTAAAGCCGGCGACGTGGACGAAGCCCTCGAGCTGTTCAAAGAGATGCGGAGCAAGGGCGTGAAGCCCAACGTGGTCACATACACCACCCTGATCGACGGCCTGTGCAAGGCCGGCAAGGTGGATGAGGCCCTGGAGCTGTTCGACGAGATGAAGGAGAGGGGCATCAAGCCCGACGTGGTCACATAATGTCTTC
pL_1	PPR2.0	A	U	GAAGACATAAACTCCGTGGTCACATACACCACACTGATCGACGGACTGTGTAAAGCCGGCGACGTGGACGAAGCCCTCGAGCTGTTCAAAGAGATGCGGAGCAAGGGCGTGAAGCCCAACGTGGTCACATACAACACCCTGATCGACGGCCTGTGCAAGGCCGGCAGACTGGATGAGGCCGAGGAGCTGCTGGAGGAGATGGAGGAGAAGGGCATCAAGCCCGACGTGGTCACATAATGTCTTC
pL_1	PPR2.0	C	A	GAAGACATAAACTCCGTGGTCACATACAACACCCTGATCGACGGCCTGTGCAAGAGCGGCAAGATCGAGGAGGCCCTGAAGCTGTTCAAGGAGATGGAGGAGAAGGGCATCACCCCCAGCGTGGTCACATACACCACACTGATCGACGGACTGTGTAAAGCCGGCGACGTGGACGAAGCCCTCGAGCTGTTCAAAGAGATGCGGAGCAAGGGCGTGAAGCCCAACGTGGTCACATAATGTCTTC
pL_1	PPR2.0	C	C	GAAGACATAAACTCCGTGGTCACATACAACACCCTGATCGACGGCCTGTGCAAGAGCGGCAAGATCGAGGAGGCCCTGAAGCTGTTCAAGGAGATGGAGGAGAAGGGCATCACCCCCAGCGTGGTCACATACAACACCCTGATCGACGGCCTGTGCAAGAGCGGCAAGATCGAGGAGGCCCTGAAGCTGTTCAAGGAGATGGAGGAGAAGGGCATCACCCCCAGCGTGGTCACATAATGTCTTC
pL_1	PPR2.0	C	G	GAAGACATAAACTCCGTGGTCACATACAACACCCTGATCGACGGCCTGTGCAAGAGCGGCAAGATCGAGGAGGCCCTGAAGCTGTTCAAGGAGATGGAGGAGAAGGGCATCACCCCCAGCGTGGTCACATACACCACCCTGATCGACGGCCTGTGCAAGGCCGGCAAGGTGGATGAGGCCCTGGAGCTGTTCGACGAGATGAAGGAGAGGGGCATCAAGCCCGACGTGGTCACATAATGTCTTC
pL_1	PPR2.0	C	U	GAAGACATAAACTCCGTGGTCACATACAACACCCTGATCGACGGCCTGTGCAAGAGCGGCAAGATCGAGGAGGCCCTGAAGCTGTTCAAGGAGATGGAGGAGAAGGGCATCACCCCCAGCGTGGTCACATACAACACCCTGATCGACGGCCTGTGCAAGGCCGGCAGACTGGATGAGGCCGAGGAGCTGCTGGAGGAGATGGAGGAGAAGGGCATCAAGCCCGACGTGGTCACATAATGTCTTC
pL_1	PPR2.0	G	A	GAAGACATAAACTCCGTGGTCACATACACCACCCTGATCGACGGCCTGTGCAAGGCCGGCAAAGTGGACGAGGCCCTGGAGCTGTTCGACGAGATGAAGGAGAGGGGCATCAAGCCCGACGTGGTCACATACACCACACTGATCGACGGACTGTGTAAAGCCGGCGACGTGGACGAAGCCCTCGAGCTGTTCAAAGAGATGCGGAGCAAGGGCGTGAAGCCCAACGTGGTCACATAATGTCTTC
pL_1	PPR2.0	G	C	GAAGACATAAACTCCGTGGTCACATACACCACCCTGATCGACGGCCTGTGCAAGGCCGGCAAAGTGGACGAGGCCCTGGAGCTGTTCGACGAGATGAAGGAGAGGGGCATCAAGCCCGACGTGGTCACATACAACACCCTGATCGACGGCCTGTGCAAGAGCGGCAAGATCGAGGAGGCCCTGAAGCTGTTCAAGGAGATGGAGGAGAAGGGCATCACCCCCAGCGTGGTCACATAATGTCTTC
pL_1	PPR2.0	G	G	GAAGACATAAACTCCGTGGTCACATACACCACCCTGATCGACGGCCTGTGCAAGGCCGGCAAAGTGGACGAGGCCCTGGAGCTGTTCGACGAGATGAAGGAGAGGGGCATCAAGCCCGACGTGGTCACATACACCACCCTGATCGACGGCCTGTGCAAGGCCGGCAAGGTGGATGAGGCCCTGGAGCTGTTCGACGAGATGAAGGAGAGGGGCATCAAGCCCGACGTGGTCACATAATGTCTTC
pL_1	PPR2.0	G	U	GAAGACATAAACTCCGTGGTCACATACACCACCCTGATCGACGGCCTGTGCAAGGCCGGCAAAGTGGACGAGGCCCTGGAGCTGTTCGACGAGATGAAGGAGAGGGGCATCAAGCCCGACGTGGTCACATACAACACCCTGATCGACGGCCTGTGCAAGGCCGGCAGACTGGATGAGGCCGAGGAGCTGCTGGAGGAGATGGAGGAGAAGGGCATCAAGCCCGACGTGGTCACATAATGTCTTC
pL_1	PPR2.0	U	A	GAAGACATAAACTCCGTGGTCACATACAACACCCTGATCGACGGCCTGTGCAAGGCCGGCAGACTGGATGAGGCCGAGGAGCTGCTGGAGGAGATGGAGGAGAAGGGCATCAAGCCCGACGTGGTCACATACACCACACTGATCGACGGACTGTGTAAAGCCGGCGACGTGGACGAAGCCCTCGAGCTGTTCAAAGAGATGCGGAGCAAGGGCGTGAAGCCCAACGTGGTCACATAATGTCTTC
pL_1	PPR2.0	U	C	GAAGACATAAACTCCGTGGTCACATACAACACCCTGATCGACGGCCTGTGCAAGGCCGGCAGACTGGATGAGGCCGAGGAGCTGCTGGAGGAGATGGAGGAGAAGGGCATCAAGCCCGACGTGGTCACATACAACACCCTGATCGACGGCCTGTGCAAGAGCGGCAAGATCGAGGAGGCCCTGAAGCTGTTCAAGGAGATGGAGGAGAAGGGCATCACCCCCAGCGTGGTCACATAATGTCTTC
pL_1	PPR2.0	U	G	GAAGACATAAACTCCGTGGTCACATACAACACCCTGATCGACGGCCTGTGCAAGGCCGGCAGACTGGATGAGGCCGAGGAGCTGCTGGAGGAGATGGAGGAGAAGGGCATCAAGCCCGACGTGGTCACATACACCACCCTGATCGACGGCCTGTGCAAGGCCGGCAAGGTGGATGAGGCCCTGGAGCTGTTCGACGAGATGAAGGAGAGGGGCATCAAGCCCGACGTGGTCACATAATGTCTTC
pL_1	PPR2.0	U	U	GAAGACATAAACTCCGTGGTCACATACAACACCCTGATCGACGGCCTGTGCAAGGCCGGCAGACTGGATGAGGCCGAGGAGCTGCTGGAGGAGATGGAGGAGAAGGGCATCAAGCCCGACGTGGTCACATACAACACCCTGATCGACGGCCTGTGCAAGGCCGGCAGACTGGATGAGGCCGAGGAGCTGCTGGAGGAGATGGAGGAGAAGGGCATCAAGCCCGACGTGGTCACATAATGTCTTC
pL_2	PPR2.0	A	A	GAAGACATCATACACCACACTGATCGACGGACTGTGTAAAGCCGGCGACGTGGACGAAGCCCTCGAGCTGTTCAAAGAGATGCGGAGCAAGGGCGTGAAGCCCAACGTGGTCACATACACCACACTGATCGACGGACTGTGTAAAGCCGGCGACGTGGACGAAGCCCTCGAGCTGTTCAAAGAGATGCGGAGCAAGGGCGTGAAGCCCAACGTGGTTACATATGTCTTC
pL_2	PPR2.0	A	C	GAAGACATCATACACCACACTGATCGACGGACTGTGTAAAGCCGGCGACGTGGACGAAGCCCTCGAGCTGTTCAAAGAGATGCGGAGCAAGGGCGTGAAGCCCAACGTGGTCACATACAACACCCTGATCGACGGCCTGTGCAAGAGCGGCAAGATCGAGGAGGCCCTGAAGCTGTTCAAGGAGATGGAGGAGAAGGGCATCACCCCCAGCGTGGTTACATATGTCTTC
pL_2	PPR2.0	A	G	GAAGACATCATACACCACACTGATCGACGGACTGTGTAAAGCCGGCGACGTGGACGAAGCCCTCGAGCTGTTCAAAGAGATGCGGAGCAAGGGCGTGAAGCCCAACGTGGTCACATACACCACCCTGATCGACGGCCTGTGCAAGGCCGGCAAGGTGGATGAGGCCCTGGAGCTGTTCGACGAGATGAAGGAGAGGGGCATCAAGCCCGACGTGGTTACATATGTCTTC
pL_2	PPR2.0	A	U	GAAGACATCATACACCACACTGATCGACGGACTGTGTAAAGCCGGCGACGTGGACGAAGCCCTCGAGCTGTTCAAAGAGATGCGGAGCAAGGGCGTGAAGCCCAACGTGGTCACATACAACACCCTGATCGACGGCCTGTGCAAGGCCGGCAGACTGGATGAGGCCGAGGAGCTGCTGGAGGAGATGGAGGAGAAGGGCATCAAGCCCGACGTGGTTACATATGTCTTC
pL_2	PPR2.0	C	A	GAAGACATCATACAACACCCTGATCGACGGCCTGTGCAAGAGCGGCAAGATCGAGGAGGCCCTGAAGCTGTTCAAGGAGATGGAGGAGAAGGGCATCACCCCCAGCGTGGTCACATACACCACACTGATCGACGGACTGTGTAAAGCCGGCGACGTGGACGAAGCCCTCGAGCTGTTCAAAGAGATGCGGAGCAAGGGCGTGAAGCCCAACGTGGTTACATATGTCTTC
pL_2	PPR2.0	C	C	GAAGACATCATACAACACCCTGATCGACGGCCTGTGCAAGAGCGGCAAGATCGAGGAGGCCCTGAAGCTGTTCAAGGAGATGGAGGAGAAGGGCATCACCCCCAGCGTGGTCACATACAACACCCTGATCGACGGCCTGTGCAAGAGCGGCAAGATCGAGGAGGCCCTGAAGCTGTTCAAGGAGATGGAGGAGAAGGGCATCACCCCCAGCGTGGTTACATATGTCTTC
pL_2	PPR2.0	C	G	GAAGACATCATACAACACCCTGATCGACGGCCTGTGCAAGAGCGGCAAGATCGAGGAGGCCCTGAAGCTGTTCAAGGAGATGGAGGAGAAGGGCATCACCCCCAGCGTGGTCACATACACCACCCTGATCGACGGCCTGTGCAAGGCCGGCAAGGTGGATGAGGCCCTGGAGCTGTTCGACGAGATGAAGGAGAGGGGCATCAAGCCCGACGTGGTTACATATGTCTTC
pL_2	PPR2.0	C	U	GAAGACATCATACAACACCCTGATCGACGGCCTGTGCAAGAGCGGCAAGATCGAGGAGGCCCTGAAGCTGTTCAAGGAGATGGAGGAGAAGGGCATCACCCCCAGCGTGGTCACATACAACACCCTGATCGACGGCCTGTGCAAGGCCGGCAGACTGGATGAGGCCGAGGAGCTGCTGGAGGAGATGGAGGAGAAGGGCATCAAGCCCGACGTGGTTACATATGTCTTC
pL_2	PPR2.0	G	A	GAAGACATCATACACCACCCTGATCGACGGCCTGTGCAAGGCCGGCAAAGTGGACGAGGCCCTGGAGCTGTTCGACGAGATGAAGGAGAGGGGCATCAAGCCCGACGTGGTCACATACACCACACTGATCGACGGACTGTGTAAAGCCGGCGACGTGGACGAAGCCCTCGAGCTGTTCAAAGAGATGCGGAGCAAGGGCGTGAAGCCCAACGTGGTTACATATGTCTTC
pL_2	PPR2.0	G	C	GAAGACATCATACACCACCCTGATCGACGGCCTGTGCAAGGCCGGCAAAGTGGACGAGGCCCTGGAGCTGTTCGACGAGATGAAGGAGAGGGGCATCAAGCCCGACGTGGTCACATACAACACCCTGATCGACGGCCTGTGCAAGAGCGGCAAGATCGAGGAGGCCCTGAAGCTGTTCAAGGAGATGGAGGAGAAGGGCATCACCCCCAGCGTGGTTACATATGTCTTC
pL_2	PPR2.0	G	G	GAAGACATCATACACCACCCTGATCGACGGCCTGTGCAAGGCCGGCAAAGTGGACGAGGCCCTGGAGCTGTTCGACGAGATGAAGGAGAGGGGCATCAAGCCCGACGTGGTCACATACACCACCCTGATCGACGGCCTGTGCAAGGCCGGCAAGGTGGATGAGGCCCTGGAGCTGTTCGACGAGATGAAGGAGAGGGGCATCAAGCCCGACGTGGTTACATATGTCTTC
pL_2	PPR2.0	G	U	GAAGACATCATACACCACCCTGATCGACGGCCTGTGCAAGGCCGGCAAAGTGGACGAGGCCCTGGAGCTGTTCGACGAGATGAAGGAGAGGGGCATCAAGCCCGACGTGGTCACATACAACACCCTGATCGACGGCCTGTGCAAGGCCGGCAGACTGGATGAGGCCGAGGAGCTGCTGGAGGAGATGGAGGAGAAGGGCATCAAGCCCGACGTGGTTACATATGTCTTC
pL_2	PPR2.0	U	A	GAAGACATCATACAACACCCTGATCGACGGCCTGTGCAAGGCCGGCAGACTGGATGAGGCCGAGGAGCTGCTGGAGGAGATGGAGGAGAAGGGCATCAAGCCCGACGTGGTCACATACACCACACTGATCGACGGACTGTGTAAAGCCGGCGACGTGGACGAAGCCCTCGAGCTGTTCAAAGAGATGCGGAGCAAGGGCGTGAAGCCCAACGTGGTTACATATGTCTTC
pL_2	PPR2.0	U	C	GAAGACATCATACAACACCCTGATCGACGGCCTGTGCAAGGCCGGCAGACTGGATGAGGCCGAGGAGCTGCTGGAGGAGATGGAGGAGAAGGGCATCAAGCCCGACGTGGTCACATACAACACCCTGATCGACGGCCTGTGCAAGAGCGGCAAGATCGAGGAGGCCCTGAAGCTGTTCAAGGAGATGGAGGAGAAGGGCATCACCCCCAGCGTGGTTACATATGTCTTC
pL_2	PPR2.0	U	G	GAAGACATCATACAACACCCTGATCGACGGCCTGTGCAAGGCCGGCAGACTGGATGAGGCCGAGGAGCTGCTGGAGGAGATGGAGGAGAAGGGCATCAAGCCCGACGTGGTCACATACACCACCCTGATCGACGGCCTGTGCAAGGCCGGCAAGGTGGATGAGGCCCTGGAGCTGTTCGACGAGATGAAGGAGAGGGGCATCAAGCCCGACGTGGTTACATATGTCTTC
pL_2	PPR2.0	U	U	GAAGACATCATACAACACCCTGATCGACGGCCTGTGCAAGGCCGGCAGACTGGATGAGGCCGAGGAGCTGCTGGAGGAGATGGAGGAGAAGGGCATCAAGCCCGACGTGGTCACATACAACACCCTGATCGACGGCCTGTGCAAGGCCGGCAGACTGGATGAGGCCGAGGAGCTGCTGGAGGAGATGGAGGAGAAGGGCATCAAGCCCGACGTGGTTACATATGTCTTC
pL_3	PPR2.0	A	A	GAAGACATACATACACCACACTGATCGACGGACTGTGTAAAGCCGGCGACGTGGACGAAGCCCTCGAGCTGTTCAAAGAGATGCGGAGCAAGGGCGTGAAGCCCAACGTGGTCACATACACCACACTGATCGACGGACTGTGTAAAGCCGGCGACGTGGACGAAGCCCTCGAGCTGTTCAAAGAGATGCGGAGCAAGGGCGTGAAGCCCAACGTGGTTACAATGTCTTC
pL_3	PPR2.0	A	C	GAAGACATACATACACCACACTGATCGACGGACTGTGTAAAGCCGGCGACGTGGACGAAGCCCTCGAGCTGTTCAAAGAGATGCGGAGCAAGGGCGTGAAGCCCAACGTGGTCACATACAACACCCTGATCGACGGCCTGTGCAAGAGCGGCAAGATCGAGGAGGCCCTGAAGCTGTTCAAGGAGATGGAGGAGAAGGGCATCACCCCCAGCGTGGTTACAATGTCTTC
pL_3	PPR2.0	A	G	GAAGACATACATACACCACACTGATCGACGGACTGTGTAAAGCCGGCGACGTGGACGAAGCCCTCGAGCTGTTCAAAGAGATGCGGAGCAAGGGCGTGAAGCCCAACGTGGTCACATACACCACCCTGATCGACGGCCTGTGCAAGGCCGGCAAGGTGGATGAGGCCCTGGAGCTGTTCGACGAGATGAAGGAGAGGGGCATCAAGCCCGACGTGGTTACAATGTCTTC
pL_3	PPR2.0	A	U	GAAGACATACATACACCACACTGATCGACGGACTGTGTAAAGCCGGCGACGTGGACGAAGCCCTCGAGCTGTTCAAAGAGATGCGGAGCAAGGGCGTGAAGCCCAACGTGGTCACATACAACACCCTGATCGACGGCCTGTGCAAGGCCGGCAGACTGGATGAGGCCGAGGAGCTGCTGGAGGAGATGGAGGAGAAGGGCATCAAGCCCGACGTGGTTACAATGTCTTC
pL_3	PPR2.0	C	A	GAAGACATACATACAACACCCTGATCGACGGCCTGTGCAAGAGCGGCAAGATCGAGGAGGCCCTGAAGCTGTTCAAGGAGATGGAGGAGAAGGGCATCACCCCCAGCGTGGTCACATACACCACACTGATCGACGGACTGTGTAAAGCCGGCGACGTGGACGAAGCCCTCGAGCTGTTCAAAGAGATGCGGAGCAAGGGCGTGAAGCCCAACGTGGTTACAATGTCTTC
pL_3	PPR2.0	C	C	GAAGACATACATACAACACCCTGATCGACGGCCTGTGCAAGAGCGGCAAGATCGAGGAGGCCCTGAAGCTGTTCAAGGAGATGGAGGAGAAGGGCATCACCCCCAGCGTGGTCACATACAACACCCTGATCGACGGCCTGTGCAAGAGCGGCAAGATCGAGGAGGCCCTGAAGCTGTTCAAGGAGATGGAGGAGAAGGGCATCACCCCCAGCGTGGTTACAATGTCTTC
pL_3	PPR2.0	C	G	GAAGACATACATACAACACCCTGATCGACGGCCTGTGCAAGAGCGGCAAGATCGAGGAGGCCCTGAAGCTGTTCAAGGAGATGGAGGAGAAGGGCATCACCCCCAGCGTGGTCACATACACCACCCTGATCGACGGCCTGTGCAAGGCCGGCAAGGTGGATGAGGCCCTGGAGCTGTTCGACGAGATGAAGGAGAGGGGCATCAAGCCCGACGTGGTTACAATGTCTTC
pL_3	PPR2.0	C	U	GAAGACATACATACAACACCCTGATCGACGGCCTGTGCAAGAGCGGCAAGATCGAGGAGGCCCTGAAGCTGTTCAAGGAGATGGAGGAGAAGGGCATCACCCCCAGCGTGGTCACATACAACACCCTGATCGACGGCCTGTGCAAGGCCGGCAGACTGGATGAGGCCGAGGAGCTGCTGGAGGAGATGGAGGAGAAGGGCATCAAGCCCGACGTGGTTACAATGTCTTC
pL_3	PPR2.0	G	A	GAAGACATACATACACCACCCTGATCGACGGCCTGTGCAAGGCCGGCAAAGTGGACGAGGCCCTGGAGCTGTTCGACGAGATGAAGGAGAGGGGCATCAAGCCCGACGTGGTCACATACACCACACTGATCGACGGACTGTGTAAAGCCGGCGACGTGGACGAAGCCCTCGAGCTGTTCAAAGAGATGCGGAGCAAGGGCGTGAAGCCCAACGTGGTTACAATGTCTTC
pL_3	PPR2.0	G	C	GAAGACATACATACACCACCCTGATCGACGGCCTGTGCAAGGCCGGCAAAGTGGACGAGGCCCTGGAGCTGTTCGACGAGATGAAGGAGAGGGGCATCAAGCCCGACGTGGTCACATACAACACCCTGATCGACGGCCTGTGCAAGAGCGGCAAGATCGAGGAGGCCCTGAAGCTGTTCAAGGAGATGGAGGAGAAGGGCATCACCCCCAGCGTGGTTACAATGTCTTC
pL_3	PPR2.0	G	G	GAAGACATACATACACCACCCTGATCGACGGCCTGTGCAAGGCCGGCAAAGTGGACGAGGCCCTGGAGCTGTTCGACGAGATGAAGGAGAGGGGCATCAAGCCCGACGTGGTCACATACACCACCCTGATCGACGGCCTGTGCAAGGCCGGCAAGGTGGATGAGGCCCTGGAGCTGTTCGACGAGATGAAGGAGAGGGGCATCAAGCCCGACGTGGTTACAATGTCTTC
pL_3	PPR2.0	G	U	GAAGACATACATACACCACCCTGATCGACGGCCTGTGCAAGGCCGGCAAAGTGGACGAGGCCCTGGAGCTGTTCGACGAGATGAAGGAGAGGGGCATCAAGCCCGACGTGGTCACATACAACACCCTGATCGACGGCCTGTGCAAGGCCGGCAGACTGGATGAGGCCGAGGAGCTGCTGGAGGAGATGGAGGAGAAGGGCATCAAGCCCGACGTGGTTACAATGTCTTC
pL_3	PPR2.0	U	A	GAAGACATACATACAACACCCTGATCGACGGCCTGTGCAAGGCCGGCAGACTGGATGAGGCCGAGGAGCTGCTGGAGGAGATGGAGGAGAAGGGCATCAAGCCCGACGTGGTCACATACACCACACTGATCGACGGACTGTGTAAAGCCGGCGACGTGGACGAAGCCCTCGAGCTGTTCAAAGAGATGCGGAGCAAGGGCGTGAAGCCCAACGTGGTTACAATGTCTTC
pL_3	PPR2.0	U	C	GAAGACATACATACAACACCCTGATCGACGGCCTGTGCAAGGCCGGCAGACTGGATGAGGCCGAGGAGCTGCTGGAGGAGATGGAGGAGAAGGGCATCAAGCCCGACGTGGTCACATACAACACCCTGATCGACGGCCTGTGCAAGAGCGGCAAGATCGAGGAGGCCCTGAAGCTGTTCAAGGAGATGGAGGAGAAGGGCATCACCCCCAGCGTGGTTACAATGTCTTC
pL_3	PPR2.0	U	G	GAAGACATACATACAACACCCTGATCGACGGCCTGTGCAAGGCCGGCAGACTGGATGAGGCCGAGGAGCTGCTGGAGGAGATGGAGGAGAAGGGCATCAAGCCCGACGTGGTCACATACACCACCCTGATCGACGGCCTGTGCAAGGCCGGCAAGGTGGATGAGGCCCTGGAGCTGTTCGACGAGATGAAGGAGAGGGGCATCAAGCCCGACGTGGTTACAATGTCTTC
pL_3	PPR2.0	U	U	GAAGACATACATACAACACCCTGATCGACGGCCTGTGCAAGGCCGGCAGACTGGATGAGGCCGAGGAGCTGCTGGAGGAGATGGAGGAGAAGGGCATCAAGCCCGACGTGGTCACATACAACACCCTGATCGACGGCCTGTGCAAGGCCGGCAGACTGGATGAGGCCGAGGAGCTGCTGGAGGAGATGGAGGAGAAGGGCATCAAGCCCGACGTGGTTACAATGTCTTC
pL_4	PPR2.0	A	A	GAAGACATTACATACACCACACTGATCGACGGACTGTGTAAAGCCGGCGACGTGGACGAAGCCCTCGAGCTGTTCAAAGAGATGCGGAGCAAGGGCGTGAAGCCCAACGTGGTCACATACACCACACTGATCGACGGACTGTGTAAAGCCGGCGACGTGGACGAAGCCCTCGAGCTGTTCAAAGAGATGCGGAGCAAGGGCGTGAAGCCCAACGTGGTGACATGTCTTC
pL_4	PPR2.0	A	C	GAAGACATTACATACACCACACTGATCGACGGACTGTGTAAAGCCGGCGACGTGGACGAAGCCCTCGAGCTGTTCAAAGAGATGCGGAGCAAGGGCGTGAAGCCCAACGTGGTCACATACAACACCCTGATCGACGGCCTGTGCAAGAGCGGCAAGATCGAGGAGGCCCTGAAGCTGTTCAAGGAGATGGAGGAGAAGGGCATCACCCCCAGCGTGGTGACATGTCTTC
pL_4	PPR2.0	A	G	GAAGACATTACATACACCACACTGATCGACGGACTGTGTAAAGCCGGCGACGTGGACGAAGCCCTCGAGCTGTTCAAAGAGATGCGGAGCAAGGGCGTGAAGCCCAACGTGGTCACATACACCACCCTGATCGACGGCCTGTGCAAGGCCGGCAAGGTGGATGAGGCCCTGGAGCTGTTCGACGAGATGAAGGAGAGGGGCATCAAGCCCGACGTGGTGACATGTCTTC
pL_4	PPR2.0	A	U	GAAGACATTACATACACCACACTGATCGACGGACTGTGTAAAGCCGGCGACGTGGACGAAGCCCTCGAGCTGTTCAAAGAGATGCGGAGCAAGGGCGTGAAGCCCAACGTGGTCACATACAACACCCTGATCGACGGCCTGTGCAAGGCCGGCAGACTGGATGAGGCCGAGGAGCTGCTGGAGGAGATGGAGGAGAAGGGCATCAAGCCCGACGTGGTGACATGTCTTC
pL_4	PPR2.0	C	A	GAAGACATTACATACAACACCCTGATCGACGGCCTGTGCAAGAGCGGCAAGATCGAGGAGGCCCTGAAGCTGTTCAAGGAGATGGAGGAGAAGGGCATCACCCCCAGCGTGGTCACATACACCACACTGATCGACGGACTGTGTAAAGCCGGCGACGTGGACGAAGCCCTCGAGCTGTTCAAAGAGATGCGGAGCAAGGGCGTGAAGCCCAACGTGGTGACATGTCTTC
pL_4	PPR2.0	C	C	GAAGACATTACATACAACACCCTGATCGACGGCCTGTGCAAGAGCGGCAAGATCGAGGAGGCCCTGAAGCTGTTCAAGGAGATGGAGGAGAAGGGCATCACCCCCAGCGTGGTCACATACAACACCCTGATCGACGGCCTGTGCAAGAGCGGCAAGATCGAGGAGGCCCTGAAGCTGTTCAAGGAGATGGAGGAGAAGGGCATCACCCCCAGCGTGGTGACATGTCTTC
pL_4	PPR2.0	C	G	GAAGACATTACATACAACACCCTGATCGACGGCCTGTGCAAGAGCGGCAAGATCGAGGAGGCCCTGAAGCTGTTCAAGGAGATGGAGGAGAAGGGCATCACCCCCAGCGTGGTCACATACACCACCCTGATCGACGGCCTGTGCAAGGCCGGCAAGGTGGATGAGGCCCTGGAGCTGTTCGACGAGATGAAGGAGAGGGGCATCAAGCCCGACGTGGTGACATGTCTTC
pL_4	PPR2.0	C	U	GAAGACATTACATACAACACCCTGATCGACGGCCTGTGCAAGAGCGGCAAGATCGAGGAGGCCCTGAAGCTGTTCAAGGAGATGGAGGAGAAGGGCATCACCCCCAGCGTGGTCACATACAACACCCTGATCGACGGCCTGTGCAAGGCCGGCAGACTGGATGAGGCCGAGGAGCTGCTGGAGGAGATGGAGGAGAAGGGCATCAAGCCCGACGTGGTGACATGTCTTC
pL_4	PPR2.0	G	A	GAAGACATTACATACACCACCCTGATCGACGGCCTGTGCAAGGCCGGCAAAGTGGACGAGGCCCTGGAGCTGTTCGACGAGATGAAGGAGAGGGGCATCAAGCCCGACGTGGTCACATACACCACACTGATCGACGGACTGTGTAAAGCCGGCGACGTGGACGAAGCCCTCGAGCTGTTCAAAGAGATGCGGAGCAAGGGCGTGAAGCCCAACGTGGTGACATGTCTTC
pL_4	PPR2.0	G	C	GAAGACATTACATACACCACCCTGATCGACGGCCTGTGCAAGGCCGGCAAAGTGGACGAGGCCCTGGAGCTGTTCGACGAGATGAAGGAGAGGGGCATCAAGCCCGACGTGGTCACATACAACACCCTGATCGACGGCCTGTGCAAGAGCGGCAAGATCGAGGAGGCCCTGAAGCTGTTCAAGGAGATGGAGGAGAAGGGCATCACCCCCAGCGTGGTGACATGTCTTC
pL_4	PPR2.0	G	G	GAAGACATTACATACACCACCCTGATCGACGGCCTGTGCAAGGCCGGCAAAGTGGACGAGGCCCTGGAGCTGTTCGACGAGATGAAGGAGAGGGGCATCAAGCCCGACGTGGTCACATACACCACCCTGATCGACGGCCTGTGCAAGGCCGGCAAGGTGGATGAGGCCCTGGAGCTGTTCGACGAGATGAAGGAGAGGGGCATCAAGCCCGACGTGGTGACATGTCTTC
pL_4	PPR2.0	G	U	GAAGACATTACATACACCACCCTGATCGACGGCCTGTGCAAGGCCGGCAAAGTGGACGAGGCCCTGGAGCTGTTCGACGAGATGAAGGAGAGGGGCATCAAGCCCGACGTGGTCACATACAACACCCTGATCGACGGCCTGTGCAAGGCCGGCAGACTGGATGAGGCCGAGGAGCTGCTGGAGGAGATGGAGGAGAAGGGCATCAAGCCCGACGTGGTGACATGTCTTC
pL_4	PPR2.0	U	A	GAAGACATTACATACAACACCCTGATCGACGGCCTGTGCAAGGCCGGCAGACTGGATGAGGCCGAGGAGCTGCTGGAGGAGATGGAGGAGAAGGGCATCAAGCCCGACGTGGTCACATACACCACACTGATCGACGGACTGTGTAAAGCCGGCGACGTGGACGAAGCCCTCGAGCTGTTCAAAGAGATGCGGAGCAAGGGCGTGAAGCCCAACGTGGTGACATGTCTTC
pL_4	PPR2.0	U	C	GAAGACATTACATACAACACCCTGATCGACGGCCTGTGCAAGGCCGGCAGACTGGATGAGGCCGAGGAGCTGCTGGAGGAGATGGAGGAGAAGGGCATCAAGCCCGACGTGGTCACATACAACACCCTGATCGACGGCCTGTGCAAGAGCGGCAAGATCGAGGAGGCCCTGAAGCTGTTCAAGGAGATGGAGGAGAAGGGCATCACCCCCAGCGTGGTGACATGTCTTC
pL_4	PPR2.0	U	G	GAAGACATTACATACAACACCCTGATCGACGGCCTGTGCAAGGCCGGCAGACTGGATGAGGCCGAGGAGCTGCTGGAGGAGATGGAGGAGAAGGGCATCAAGCCCGACGTGGTCACATACACCACCCTGATCGACGGCCTGTGCAAGGCCGGCAAGGTGGATGAGGCCCTGGAGCTGTTCGACGAGATGAAGGAGAGGGGCATCAAGCCCGACGTGGTGACATGTCTTC
pL_4	PPR2.0	U	U	GAAGACATTACATACAACACCCTGATCGACGGCCTGTGCAAGGCCGGCAGACTGGATGAGGCCGAGGAGCTGCTGGAGGAGATGGAGGAGAAGGGCATCAAGCCCGACGTGGTCACATACAACACCCTGATCGACGGCCTGTGCAAGGCCGGCAGACTGGATGAGGCCGAGGAGCTGCTGGAGGAGATGGAGGAGAAGGGCATCAAGCCCGACGTGGTGACATGTCTTC
pL_5	PPR2.0	A	A	GAAGACATTGACATACACCACACTGATCGACGGACTGTGTAAAGCCGGCGACGTGGACGAAGCCCTCGAGCTGTTCAAAGAGATGCGGAGCAAGGGCGTGAAGCCCAACGTGGTCACATACACCACACTGATCGACGGACTGTGTAAAGCCGGCGACGTGGACGAAGCCCTCGAGCTGTTCAAAGAGATGCGGAGCAAGGGCGTGAAGCCCAACGTGGTTAATGTCTTC
pL_5	PPR2.0	A	C	GAAGACATTGACATACACCACACTGATCGACGGACTGTGTAAAGCCGGCGACGTGGACGAAGCCCTCGAGCTGTTCAAAGAGATGCGGAGCAAGGGCGTGAAGCCCAACGTGGTCACATACAACACCCTGATCGACGGCCTGTGCAAGAGCGGCAAGATCGAGGAGGCCCTGAAGCTGTTCAAGGAGATGGAGGAGAAGGGCATCACCCCCAGCGTGGTTAATGTCTTC
pL_5	PPR2.0	A	G	GAAGACATTGACATACACCACACTGATCGACGGACTGTGTAAAGCCGGCGACGTGGACGAAGCCCTCGAGCTGTTCAAAGAGATGCGGAGCAAGGGCGTGAAGCCCAACGTGGTCACATACACCACCCTGATCGACGGCCTGTGCAAGGCCGGCAAGGTGGATGAGGCCCTGGAGCTGTTCGACGAGATGAAGGAGAGGGGCATCAAGCCCGACGTGGTTAATGTCTTC
pL_5	PPR2.0	A	U	GAAGACATTGACATACACCACACTGATCGACGGACTGTGTAAAGCCGGCGACGTGGACGAAGCCCTCGAGCTGTTCAAAGAGATGCGGAGCAAGGGCGTGAAGCCCAACGTGGTCACATACAACACCCTGATCGACGGCCTGTGCAAGGCCGGCAGACTGGATGAGGCCGAGGAGCTGCTGGAGGAGATGGAGGAGAAGGGCATCAAGCCCGACGTGGTTAATGTCTTC
pL_5	PPR2.0	C	A	GAAGACATTGACATACAACACCCTGATCGACGGCCTGTGCAAGAGCGGCAAGATCGAGGAGGCCCTGAAGCTGTTCAAGGAGATGGAGGAGAAGGGCATCACCCCCAGCGTGGTCACATACACCACACTGATCGACGGACTGTGTAAAGCCGGCGACGTGGACGAAGCCCTCGAGCTGTTCAAAGAGATGCGGAGCAAGGGCGTGAAGCCCAACGTGGTTAATGTCTTC
pL_5	PPR2.0	C	C	GAAGACATTGACATACAACACCCTGATCGACGGCCTGTGCAAGAGCGGCAAGATCGAGGAGGCCCTGAAGCTGTTCAAGGAGATGGAGGAGAAGGGCATCACCCCCAGCGTGGTCACATACAACACCCTGATCGACGGCCTGTGCAAGAGCGGCAAGATCGAGGAGGCCCTGAAGCTGTTCAAGGAGATGGAGGAGAAGGGCATCACCCCCAGCGTGGTTAATGTCTTC
pL_5	PPR2.0	C	G	GAAGACATTGACATACAACACCCTGATCGACGGCCTGTGCAAGAGCGGCAAGATCGAGGAGGCCCTGAAGCTGTTCAAGGAGATGGAGGAGAAGGGCATCACCCCCAGCGTGGTCACATACACCACCCTGATCGACGGCCTGTGCAAGGCCGGCAAGGTGGATGAGGCCCTGGAGCTGTTCGACGAGATGAAGGAGAGGGGCATCAAGCCCGACGTGGTTAATGTCTTC
pL_5	PPR2.0	C	U	GAAGACATTGACATACAACACCCTGATCGACGGCCTGTGCAAGAGCGGCAAGATCGAGGAGGCCCTGAAGCTGTTCAAGGAGATGGAGGAGAAGGGCATCACCCCCAGCGTGGTCACATACAACACCCTGATCGACGGCCTGTGCAAGGCCGGCAGACTGGATGAGGCCGAGGAGCTGCTGGAGGAGATGGAGGAGAAGGGCATCAAGCCCGACGTGGTTAATGTCTTC
pL_5	PPR2.0	G	A	GAAGACATTGACATACACCACCCTGATCGACGGCCTGTGCAAGGCCGGCAAAGTGGACGAGGCCCTGGAGCTGTTCGACGAGATGAAGGAGAGGGGCATCAAGCCCGACGTGGTCACATACACCACACTGATCGACGGACTGTGTAAAGCCGGCGACGTGGACGAAGCCCTCGAGCTGTTCAAAGAGATGCGGAGCAAGGGCGTGAAGCCCAACGTGGTTAATGTCTTC
pL_5	PPR2.0	G	C	GAAGACATTGACATACACCACCCTGATCGACGGCCTGTGCAAGGCCGGCAAAGTGGACGAGGCCCTGGAGCTGTTCGACGAGATGAAGGAGAGGGGCATCAAGCCCGACGTGGTCACATACAACACCCTGATCGACGGCCTGTGCAAGAGCGGCAAGATCGAGGAGGCCCTGAAGCTGTTCAAGGAGATGGAGGAGAAGGGCATCACCCCCAGCGTGGTTAATGTCTTC
pL_5	PPR2.0	G	G	GAAGACATTGACATACACCACCCTGATCGACGGCCTGTGCAAGGCCGGCAAAGTGGACGAGGCCCTGGAGCTGTTCGACGAGATGAAGGAGAGGGGCATCAAGCCCGACGTGGTCACATACACCACCCTGATCGACGGCCTGTGCAAGGCCGGCAAGGTGGATGAGGCCCTGGAGCTGTTCGACGAGATGAAGGAGAGGGGCATCAAGCCCGACGTGGTTAATGTCTTC
pL_5	PPR2.0	G	U	GAAGACATTGACATACACCACCCTGATCGACGGCCTGTGCAAGGCCGGCAAAGTGGACGAGGCCCTGGAGCTGTTCGACGAGATGAAGGAGAGGGGCATCAAGCCCGACGTGGTCACATACAACACCCTGATCGACGGCCTGTGCAAGGCCGGCAGACTGGATGAGGCCGAGGAGCTGCTGGAGGAGATGGAGGAGAAGGGCATCAAGCCCGACGTGGTTAATGTCTTC
pL_5	PPR2.0	U	A	GAAGACATTGACATACAACACCCTGATCGACGGCCTGTGCAAGGCCGGCAGACTGGATGAGGCCGAGGAGCTGCTGGAGGAGATGGAGGAGAAGGGCATCAAGCCCGACGTGGTCACATACACCACACTGATCGACGGACTGTGTAAAGCCGGCGACGTGGACGAAGCCCTCGAGCTGTTCAAAGAGATGCGGAGCAAGGGCGTGAAGCCCAACGTGGTTAATGTCTTC
pL_5	PPR2.0	U	C	GAAGACATTGACATACAACACCCTGATCGACGGCCTGTGCAAGGCCGGCAGACTGGATGAGGCCGAGGAGCTGCTGGAGGAGATGGAGGAGAAGGGCATCAAGCCCGACGTGGTCACATACAACACCCTGATCGACGGCCTGTGCAAGAGCGGCAAGATCGAGGAGGCCCTGAAGCTGTTCAAGGAGATGGAGGAGAAGGGCATCACCCCCAGCGTGGTTAATGTCTTC
pL_5	PPR2.0	U	G	GAAGACATTGACATACAACACCCTGATCGACGGCCTGTGCAAGGCCGGCAGACTGGATGAGGCCGAGGAGCTGCTGGAGGAGATGGAGGAGAAGGGCATCAAGCCCGACGTGGTCACATACACCACCCTGATCGACGGCCTGTGCAAGGCCGGCAAGGTGGATGAGGCCCTGGAGCTGTTCGACGAGATGAAGGAGAGGGGCATCAAGCCCGACGTGGTTAATGTCTTC
pL_5	PPR2.0	U	U	GAAGACATTGACATACAACACCCTGATCGACGGCCTGTGCAAGGCCGGCAGACTGGATGAGGCCGAGGAGCTGCTGGAGGAGATGGAGGAGAAGGGCATCAAGCCCGACGTGGTCACATACAACACCCTGATCGACGGCCTGTGCAAGGCCGGCAGACTGGATGAGGCCGAGGAGCTGCTGGAGGAGATGGAGGAGAAGGGCATCAAGCCCGACGTGGTTAATGTCTTC
pL_6	PPR2.0	A	A	GAAGACATGTTACATACACCACACTGATCGACGGACTGTGTAAAGCCGGCGACGTGGACGAAGCCCTCGAGCTGTTCAAAGAGATGCGGAGCAAGGGCGTGAAGCCCAACGTGGTCACATACACCACACTGATCGACGGACTGTGTAAAGCCGGCGACGTGGACGAAGCCCTCGAGCTGTTCAAAGAGATGCGGAGCAAGGGCGTGAAGCCCAACGTGGTCATGTCTTC
pL_6	PPR2.0	A	C	GAAGACATGTTACATACACCACACTGATCGACGGACTGTGTAAAGCCGGCGACGTGGACGAAGCCCTCGAGCTGTTCAAAGAGATGCGGAGCAAGGGCGTGAAGCCCAACGTGGTCACATACAACACCCTGATCGACGGCCTGTGCAAGAGCGGCAAGATCGAGGAGGCCCTGAAGCTGTTCAAGGAGATGGAGGAGAAGGGCATCACCCCCAGCGTGGTCATGTCTTC
pL_6	PPR2.0	A	G	GAAGACATGTTACATACACCACACTGATCGACGGACTGTGTAAAGCCGGCGACGTGGACGAAGCCCTCGAGCTGTTCAAAGAGATGCGGAGCAAGGGCGTGAAGCCCAACGTGGTCACATACACCACCCTGATCGACGGCCTGTGCAAGGCCGGCAAGGTGGATGAGGCCCTGGAGCTGTTCGACGAGATGAAGGAGAGGGGCATCAAGCCCGACGTGGTCATGTCTTC
pL_6	PPR2.0	A	U	GAAGACATGTTACATACACCACACTGATCGACGGACTGTGTAAAGCCGGCGACGTGGACGAAGCCCTCGAGCTGTTCAAAGAGATGCGGAGCAAGGGCGTGAAGCCCAACGTGGTCACATACAACACCCTGATCGACGGCCTGTGCAAGGCCGGCAGACTGGATGAGGCCGAGGAGCTGCTGGAGGAGATGGAGGAGAAGGGCATCAAGCCCGACGTGGTCATGTCTTC
pL_6	PPR2.0	C	A	GAAGACATGTTACATACAACACCCTGATCGACGGCCTGTGCAAGAGCGGCAAGATCGAGGAGGCCCTGAAGCTGTTCAAGGAGATGGAGGAGAAGGGCATCACCCCCAGCGTGGTCACATACACCACACTGATCGACGGACTGTGTAAAGCCGGCGACGTGGACGAAGCCCTCGAGCTGTTCAAAGAGATGCGGAGCAAGGGCGTGAAGCCCAACGTGGTCATGTCTTC
pL_6	PPR2.0	C	C	GAAGACATGTTACATACAACACCCTGATCGACGGCCTGTGCAAGAGCGGCAAGATCGAGGAGGCCCTGAAGCTGTTCAAGGAGATGGAGGAGAAGGGCATCACCCCCAGCGTGGTCACATACAACACCCTGATCGACGGCCTGTGCAAGAGCGGCAAGATCGAGGAGGCCCTGAAGCTGTTCAAGGAGATGGAGGAGAAGGGCATCACCCCCAGCGTGGTCATGTCTTC
pL_6	PPR2.0	C	G	GAAGACATGTTACATACAACACCCTGATCGACGGCCTGTGCAAGAGCGGCAAGATCGAGGAGGCCCTGAAGCTGTTCAAGGAGATGGAGGAGAAGGGCATCACCCCCAGCGTGGTCACATACACCACCCTGATCGACGGCCTGTGCAAGGCCGGCAAGGTGGATGAGGCCCTGGAGCTGTTCGACGAGATGAAGGAGAGGGGCATCAAGCCCGACGTGGTCATGTCTTC
pL_6	PPR2.0	C	U	GAAGACATGTTACATACAACACCCTGATCGACGGCCTGTGCAAGAGCGGCAAGATCGAGGAGGCCCTGAAGCTGTTCAAGGAGATGGAGGAGAAGGGCATCACCCCCAGCGTGGTCACATACAACACCCTGATCGACGGCCTGTGCAAGGCCGGCAGACTGGATGAGGCCGAGGAGCTGCTGGAGGAGATGGAGGAGAAGGGCATCAAGCCCGACGTGGTCATGTCTTC
pL_6	PPR2.0	G	A	GAAGACATGTTACATACACCACCCTGATCGACGGCCTGTGCAAGGCCGGCAAAGTGGACGAGGCCCTGGAGCTGTTCGACGAGATGAAGGAGAGGGGCATCAAGCCCGACGTGGTCACATACACCACACTGATCGACGGACTGTGTAAAGCCGGCGACGTGGACGAAGCCCTCGAGCTGTTCAAAGAGATGCGGAGCAAGGGCGTGAAGCCCAACGTGGTCATGTCTTC
pL_6	PPR2.0	G	C	GAAGACATGTTACATACACCACCCTGATCGACGGCCTGTGCAAGGCCGGCAAAGTGGACGAGGCCCTGGAGCTGTTCGACGAGATGAAGGAGAGGGGCATCAAGCCCGACGTGGTCACATACAACACCCTGATCGACGGCCTGTGCAAGAGCGGCAAGATCGAGGAGGCCCTGAAGCTGTTCAAGGAGATGGAGGAGAAGGGCATCACCCCCAGCGTGGTCATGTCTTC
pL_6	PPR2.0	G	G	GAAGACATGTTACATACACCACCCTGATCGACGGCCTGTGCAAGGCCGGCAAAGTGGACGAGGCCCTGGAGCTGTTCGACGAGATGAAGGAGAGGGGCATCAAGCCCGACGTGGTCACATACACCACCCTGATCGACGGCCTGTGCAAGGCCGGCAAGGTGGATGAGGCCCTGGAGCTGTTCGACGAGATGAAGGAGAGGGGCATCAAGCCCGACGTGGTCATGTCTTC
pL_6	PPR2.0	G	U	GAAGACATGTTACATACACCACCCTGATCGACGGCCTGTGCAAGGCCGGCAAAGTGGACGAGGCCCTGGAGCTGTTCGACGAGATGAAGGAGAGGGGCATCAAGCCCGACGTGGTCACATACAACACCCTGATCGACGGCCTGTGCAAGGCCGGCAGACTGGATGAGGCCGAGGAGCTGCTGGAGGAGATGGAGGAGAAGGGCATCAAGCCCGACGTGGTCATGTCTTC
pL_6	PPR2.0	U	A	GAAGACATGTTACATACAACACCCTGATCGACGGCCTGTGCAAGGCCGGCAGACTGGATGAGGCCGAGGAGCTGCTGGAGGAGATGGAGGAGAAGGGCATCAAGCCCGACGTGGTCACATACACCACACTGATCGACGGACTGTGTAAAGCCGGCGACGTGGACGAAGCCCTCGAGCTGTTCAAAGAGATGCGGAGCAAGGGCGTGAAGCCCAACGTGGTCATGTCTTC
pL_6	PPR2.0	U	C	GAAGACATGTTACATACAACACCCTGATCGACGGCCTGTGCAAGGCCGGCAGACTGGATGAGGCCGAGGAGCTGCTGGAGGAGATGGAGGAGAAGGGCATCAAGCCCGACGTGGTCACATACAACACCCTGATCGACGGCCTGTGCAAGAGCGGCAAGATCGAGGAGGCCCTGAAGCTGTTCAAGGAGATGGAGGAGAAGGGCATCACCCCCAGCGTGGTCATGTCTTC
pL_6	PPR2.0	U	G	GAAGACATGTTACATACAACACCCTGATCGACGGCCTGTGCAAGGCCGGCAGACTGGATGAGGCCGAGGAGCTGCTGGAGGAGATGGAGGAGAAGGGCATCAAGCCCGACGTGGTCACATACACCACCCTGATCGACGGCCTGTGCAAGGCCGGCAAGGTGGATGAGGCCCTGGAGCTGTTCGACGAGATGAAGGAGAGGGGCATCAAGCCCGACGTGGTCATGTCTTC
pL_6	PPR2.0	U	U	GAAGACATGTTACATACAACACCCTGATCGACGGCCTGTGCAAGGCCGGCAGACTGGATGAGGCCGAGGAGCTGCTGGAGGAGATGGAGGAGAAGGGCATCAAGCCCGACGTGGTCACATACAACACCCTGATCGACGGCCTGTGCAAGGCCGGCAGACTGGATGAGGCCGAGGAGCTGCTGGAGGAGATGGAGGAGAAGGGCATCAAGCCCGACGTGGTCATGTCTTC
pL_7	PPR2.0	A	A	GAAGACATGGTCACATACACCACACTGATCGACGGACTGTGTAAAGCCGGCGACGTGGACGAAGCCCTCGAGCTGTTCAAAGAGATGCGGAGCAAGGGCGTGAAGCCCAACGTGGTCACATACACCACACTGATCGACGGACTGTGTAAAGCCGGCGACGTGGACGAAGCCCTCGAGCTGTTCAAAGAGATGCGGAGCAAGGGCGTGAAGCCCAACGTGGTATGTCTTC
pL_7	PPR2.0	A	C	GAAGACATGGTCACATACACCACACTGATCGACGGACTGTGTAAAGCCGGCGACGTGGACGAAGCCCTCGAGCTGTTCAAAGAGATGCGGAGCAAGGGCGTGAAGCCCAACGTGGTCACATACAACACCCTGATCGACGGCCTGTGCAAGAGCGGCAAGATCGAGGAGGCCCTGAAGCTGTTCAAGGAGATGGAGGAGAAGGGCATCACCCCCAGCGTGGTATGTCTTC
pL_7	PPR2.0	A	G	GAAGACATGGTCACATACACCACACTGATCGACGGACTGTGTAAAGCCGGCGACGTGGACGAAGCCCTCGAGCTGTTCAAAGAGATGCGGAGCAAGGGCGTGAAGCCCAACGTGGTCACATACACCACCCTGATCGACGGCCTGTGCAAGGCCGGCAAGGTGGATGAGGCCCTGGAGCTGTTCGACGAGATGAAGGAGAGGGGCATCAAGCCCGACGTGGTATGTCTTC
pL_7	PPR2.0	A	U	GAAGACATGGTCACATACACCACACTGATCGACGGACTGTGTAAAGCCGGCGACGTGGACGAAGCCCTCGAGCTGTTCAAAGAGATGCGGAGCAAGGGCGTGAAGCCCAACGTGGTCACATACAACACCCTGATCGACGGCCTGTGCAAGGCCGGCAGACTGGATGAGGCCGAGGAGCTGCTGGAGGAGATGGAGGAGAAGGGCATCAAGCCCGACGTGGTATGTCTTC
pL_7	PPR2.0	C	A	GAAGACATGGTCACATACAACACCCTGATCGACGGCCTGTGCAAGAGCGGCAAGATCGAGGAGGCCCTGAAGCTGTTCAAGGAGATGGAGGAGAAGGGCATCACCCCCAGCGTGGTCACATACACCACACTGATCGACGGACTGTGTAAAGCCGGCGACGTGGACGAAGCCCTCGAGCTGTTCAAAGAGATGCGGAGCAAGGGCGTGAAGCCCAACGTGGTATGTCTTC
pL_7	PPR2.0	C	C	GAAGACATGGTCACATACAACACCCTGATCGACGGCCTGTGCAAGAGCGGCAAGATCGAGGAGGCCCTGAAGCTGTTCAAGGAGATGGAGGAGAAGGGCATCACCCCCAGCGTGGTCACATACAACACCCTGATCGACGGCCTGTGCAAGAGCGGCAAGATCGAGGAGGCCCTGAAGCTGTTCAAGGAGATGGAGGAGAAGGGCATCACCCCCAGCGTGGTATGTCTTC
pL_7	PPR2.0	C	G	GAAGACATGGTCACATACAACACCCTGATCGACGGCCTGTGCAAGAGCGGCAAGATCGAGGAGGCCCTGAAGCTGTTCAAGGAGATGGAGGAGAAGGGCATCACCCCCAGCGTGGTCACATACACCACCCTGATCGACGGCCTGTGCAAGGCCGGCAAGGTGGATGAGGCCCTGGAGCTGTTCGACGAGATGAAGGAGAGGGGCATCAAGCCCGACGTGGTATGTCTTC
pL_7	PPR2.0	C	U	GAAGACATGGTCACATACAACACCCTGATCGACGGCCTGTGCAAGAGCGGCAAGATCGAGGAGGCCCTGAAGCTGTTCAAGGAGATGGAGGAGAAGGGCATCACCCCCAGCGTGGTCACATACAACACCCTGATCGACGGCCTGTGCAAGGCCGGCAGACTGGATGAGGCCGAGGAGCTGCTGGAGGAGATGGAGGAGAAGGGCATCAAGCCCGACGTGGTATGTCTTC
pL_7	PPR2.0	G	A	GAAGACATGGTCACATACACCACCCTGATCGACGGCCTGTGCAAGGCCGGCAAAGTGGACGAGGCCCTGGAGCTGTTCGACGAGATGAAGGAGAGGGGCATCAAGCCCGACGTGGTCACATACACCACACTGATCGACGGACTGTGTAAAGCCGGCGACGTGGACGAAGCCCTCGAGCTGTTCAAAGAGATGCGGAGCAAGGGCGTGAAGCCCAACGTGGTATGTCTTC
pL_7	PPR2.0	G	C	GAAGACATGGTCACATACACCACCCTGATCGACGGCCTGTGCAAGGCCGGCAAAGTGGACGAGGCCCTGGAGCTGTTCGACGAGATGAAGGAGAGGGGCATCAAGCCCGACGTGGTCACATACAACACCCTGATCGACGGCCTGTGCAAGAGCGGCAAGATCGAGGAGGCCCTGAAGCTGTTCAAGGAGATGGAGGAGAAGGGCATCACCCCCAGCGTGGTATGTCTTC
pL_7	PPR2.0	G	G	GAAGACATGGTCACATACACCACCCTGATCGACGGCCTGTGCAAGGCCGGCAAAGTGGACGAGGCCCTGGAGCTGTTCGACGAGATGAAGGAGAGGGGCATCAAGCCCGACGTGGTCACATACACCACCCTGATCGACGGCCTGTGCAAGGCCGGCAAGGTGGATGAGGCCCTGGAGCTGTTCGACGAGATGAAGGAGAGGGGCATCAAGCCCGACGTGGTATGTCTTC
pL_7	PPR2.0	G	U	GAAGACATGGTCACATACACCACCCTGATCGACGGCCTGTGCAAGGCCGGCAAAGTGGACGAGGCCCTGGAGCTGTTCGACGAGATGAAGGAGAGGGGCATCAAGCCCGACGTGGTCACATACAACACCCTGATCGACGGCCTGTGCAAGGCCGGCAGACTGGATGAGGCCGAGGAGCTGCTGGAGGAGATGGAGGAGAAGGGCATCAAGCCCGACGTGGTATGTCTTC
pL_7	PPR2.0	U	A	GAAGACATGGTCACATACAACACCCTGATCGACGGCCTGTGCAAGGCCGGCAGACTGGATGAGGCCGAGGAGCTGCTGGAGGAGATGGAGGAGAAGGGCATCAAGCCCGACGTGGTCACATACACCACACTGATCGACGGACTGTGTAAAGCCGGCGACGTGGACGAAGCCCTCGAGCTGTTCAAAGAGATGCGGAGCAAGGGCGTGAAGCCCAACGTGGTATGTCTTC
pL_7	PPR2.0	U	C	GAAGACATGGTCACATACAACACCCTGATCGACGGCCTGTGCAAGGCCGGCAGACTGGATGAGGCCGAGGAGCTGCTGGAGGAGATGGAGGAGAAGGGCATCAAGCCCGACGTGGTCACATACAACACCCTGATCGACGGCCTGTGCAAGAGCGGCAAGATCGAGGAGGCCCTGAAGCTGTTCAAGGAGATGGAGGAGAAGGGCATCACCCCCAGCGTGGTATGTCTTC
pL_7	PPR2.0	U	G	GAAGACATGGTCACATACAACACCCTGATCGACGGCCTGTGCAAGGCCGGCAGACTGGATGAGGCCGAGGAGCTGCTGGAGGAGATGGAGGAGAAGGGCATCAAGCCCGACGTGGTCACATACACCACCCTGATCGACGGCCTGTGCAAGGCCGGCAAGGTGGATGAGGCCCTGGAGCTGTTCGACGAGATGAAGGAGAGGGGCATCAAGCCCGACGTGGTATGTCTTC
pL_7	PPR2.0	U	U	GAAGACATGGTCACATACAACACCCTGATCGACGGCCTGTGCAAGGCCGGCAGACTGGATGAGGCCGAGGAGCTGCTGGAGGAGATGGAGGAGAAGGGCATCAAGCCCGACGTGGTCACATACAACACCCTGATCGACGGCCTGTGCAAGGCCGGCAGACTGGATGAGGCCGAGGAGCTGCTGGAGGAGATGGAGGAGAAGGGCATCAAGCCCGACGTGGTATGTCTTC
pL_8	PPR2.0	A	A	GAAGACATTGGTTACATACACCACACTGATCGACGGACTGTGTAAAGCCGGCGACGTGGACGAAGCCCTCGAGCTGTTCAAAGAGATGCGGAGCAAGGGCGTGAAGCCCAACGTGGTCACATACACCACACTGATCGACGGACTGTGTAAAGCCGGCGACGTGGACGAAGCCCTCGAGCTGTTCAAAGAGATGCGGAGCAAGGGCGTGAAGCCCAACGTGGATGTCTTC
pL_8	PPR2.0	A	C	GAAGACATTGGTTACATACACCACACTGATCGACGGACTGTGTAAAGCCGGCGACGTGGACGAAGCCCTCGAGCTGTTCAAAGAGATGCGGAGCAAGGGCGTGAAGCCCAACGTGGTCACATACAACACCCTGATCGACGGCCTGTGCAAGAGCGGCAAGATCGAGGAGGCCCTGAAGCTGTTCAAGGAGATGGAGGAGAAGGGCATCACCCCCAGCGTGGATGTCTTC
pL_8	PPR2.0	A	G	GAAGACATTGGTTACATACACCACACTGATCGACGGACTGTGTAAAGCCGGCGACGTGGACGAAGCCCTCGAGCTGTTCAAAGAGATGCGGAGCAAGGGCGTGAAGCCCAACGTGGTCACATACACCACCCTGATCGACGGCCTGTGCAAGGCCGGCAAGGTGGATGAGGCCCTGGAGCTGTTCGACGAGATGAAGGAGAGGGGCATCAAGCCCGACGTGGATGTCTTC
pL_8	PPR2.0	A	U	GAAGACATTGGTTACATACACCACACTGATCGACGGACTGTGTAAAGCCGGCGACGTGGACGAAGCCCTCGAGCTGTTCAAAGAGATGCGGAGCAAGGGCGTGAAGCCCAACGTGGTCACATACAACACCCTGATCGACGGCCTGTGCAAGGCCGGCAGACTGGATGAGGCCGAGGAGCTGCTGGAGGAGATGGAGGAGAAGGGCATCAAGCCCGACGTGGATGTCTTC
pL_8	PPR2.0	C	A	GAAGACATTGGTTACATACAACACCCTGATCGACGGCCTGTGCAAGAGCGGCAAGATCGAGGAGGCCCTGAAGCTGTTCAAGGAGATGGAGGAGAAGGGCATCACCCCCAGCGTGGTCACATACACCACACTGATCGACGGACTGTGTAAAGCCGGCGACGTGGACGAAGCCCTCGAGCTGTTCAAAGAGATGCGGAGCAAGGGCGTGAAGCCCAACGTGGATGTCTTC
pL_8	PPR2.0	C	C	GAAGACATTGGTTACATACAACACCCTGATCGACGGCCTGTGCAAGAGCGGCAAGATCGAGGAGGCCCTGAAGCTGTTCAAGGAGATGGAGGAGAAGGGCATCACCCCCAGCGTGGTCACATACAACACCCTGATCGACGGCCTGTGCAAGAGCGGCAAGATCGAGGAGGCCCTGAAGCTGTTCAAGGAGATGGAGGAGAAGGGCATCACCCCCAGCGTGGATGTCTTC
pL_8	PPR2.0	C	G	GAAGACATTGGTTACATACAACACCCTGATCGACGGCCTGTGCAAGAGCGGCAAGATCGAGGAGGCCCTGAAGCTGTTCAAGGAGATGGAGGAGAAGGGCATCACCCCCAGCGTGGTCACATACACCACCCTGATCGACGGCCTGTGCAAGGCCGGCAAGGTGGATGAGGCCCTGGAGCTGTTCGACGAGATGAAGGAGAGGGGCATCAAGCCCGACGTGGATGTCTTC
pL_8	PPR2.0	C	U	GAAGACATTGGTTACATACAACACCCTGATCGACGGCCTGTGCAAGAGCGGCAAGATCGAGGAGGCCCTGAAGCTGTTCAAGGAGATGGAGGAGAAGGGCATCACCCCCAGCGTGGTCACATACAACACCCTGATCGACGGCCTGTGCAAGGCCGGCAGACTGGATGAGGCCGAGGAGCTGCTGGAGGAGATGGAGGAGAAGGGCATCAAGCCCGACGTGGATGTCTTC
pL_8	PPR2.0	G	A	GAAGACATTGGTTACATACACCACCCTGATCGACGGCCTGTGCAAGGCCGGCAAAGTGGACGAGGCCCTGGAGCTGTTCGACGAGATGAAGGAGAGGGGCATCAAGCCCGACGTGGTCACATACACCACACTGATCGACGGACTGTGTAAAGCCGGCGACGTGGACGAAGCCCTCGAGCTGTTCAAAGAGATGCGGAGCAAGGGCGTGAAGCCCAACGTGGATGTCTTC
pL_8	PPR2.0	G	C	GAAGACATTGGTTACATACACCACCCTGATCGACGGCCTGTGCAAGGCCGGCAAAGTGGACGAGGCCCTGGAGCTGTTCGACGAGATGAAGGAGAGGGGCATCAAGCCCGACGTGGTCACATACAACACCCTGATCGACGGCCTGTGCAAGAGCGGCAAGATCGAGGAGGCCCTGAAGCTGTTCAAGGAGATGGAGGAGAAGGGCATCACCCCCAGCGTGGATGTCTTC
pL_8	PPR2.0	G	G	GAAGACATTGGTTACATACACCACCCTGATCGACGGCCTGTGCAAGGCCGGCAAAGTGGACGAGGCCCTGGAGCTGTTCGACGAGATGAAGGAGAGGGGCATCAAGCCCGACGTGGTCACATACACCACCCTGATCGACGGCCTGTGCAAGGCCGGCAAGGTGGATGAGGCCCTGGAGCTGTTCGACGAGATGAAGGAGAGGGGCATCAAGCCCGACGTGGATGTCTTC
pL_8	PPR2.0	G	U	GAAGACATTGGTTACATACACCACCCTGATCGACGGCCTGTGCAAGGCCGGCAAAGTGGACGAGGCCCTGGAGCTGTTCGACGAGATGAAGGAGAGGGGCATCAAGCCCGACGTGGTCACATACAACACCCTGATCGACGGCCTGTGCAAGGCCGGCAGACTGGATGAGGCCGAGGAGCTGCTGGAGGAGATGGAGGAGAAGGGCATCAAGCCCGACGTGGATGTCTTC
pL_8	PPR2.0	U	A	GAAGACATTGGTTACATACAACACCCTGATCGACGGCCTGTGCAAGGCCGGCAGACTGGATGAGGCCGAGGAGCTGCTGGAGGAGATGGAGGAGAAGGGCATCAAGCCCGACGTGGTCACATACACCACACTGATCGACGGACTGTGTAAAGCCGGCGACGTGGACGAAGCCCTCGAGCTGTTCAAAGAGATGCGGAGCAAGGGCGTGAAGCCCAACGTGGATGTCTTC
pL_8	PPR2.0	U	C	GAAGACATTGGTTACATACAACACCCTGATCGACGGCCTGTGCAAGGCCGGCAGACTGGATGAGGCCGAGGAGCTGCTGGAGGAGATGGAGGAGAAGGGCATCAAGCCCGACGTGGTCACATACAACACCCTGATCGACGGCCTGTGCAAGAGCGGCAAGATCGAGGAGGCCCTGAAGCTGTTCAAGGAGATGGAGGAGAAGGGCATCACCCCCAGCGTGGATGTCTTC
pL_8	PPR2.0	U	G	GAAGACATTGGTTACATACAACACCCTGATCGACGGCCTGTGCAAGGCCGGCAGACTGGATGAGGCCGAGGAGCTGCTGGAGGAGATGGAGGAGAAGGGCATCAAGCCCGACGTGGTCACATACACCACCCTGATCGACGGCCTGTGCAAGGCCGGCAAGGTGGATGAGGCCCTGGAGCTGTTCGACGAGATGAAGGAGAGGGGCATCAAGCCCGACGTGGATGTCTTC
pL_8	PPR2.0	U	U	GAAGACATTGGTTACATACAACACCCTGATCGACGGCCTGTGCAAGGCCGGCAGACTGGATGAGGCCGAGGAGCTGCTGGAGGAGATGGAGGAGAAGGGCATCAAGCCCGACGTGGTCACATACAACACCCTGATCGACGGCCTGTGCAAGGCCGGCAGACTGGATGAGGCCGAGGAGCTGCTGGAGGAGATGGAGGAGAAGGGCATCAAGCCCGACGTGGATGTCTTC
pL_9	PPR2.0	A	A	GAAGACATGTGGTGACATACACCACACTGATCGACGGACTGTGTAAAGCCGGCGACGTGGACGAAGCCCTCGAGCTGTTCAAAGAGATGCGGAGCAAGGGCGTGAAGCCCAACGTGGTCACATACACCACACTGATCGACGGACTGTGTAAAGCCGGCGACGTGGACGAAGCCCTCGAGCTGTTCAAAGAGATGCGGAGCAAGGGCGTGAAGCCCAACGAGCTGACGATGTCTTC
pL_9	PPR2.0	A	C	GAAGACATGTGGTGACATACACCACACTGATCGACGGACTGTGTAAAGCCGGCGACGTGGACGAAGCCCTCGAGCTGTTCAAAGAGATGCGGAGCAAGGGCGTGAAGCCCAACGTGGTCACATACAACACCCTGATCGACGGCCTGTGCAAGAGCGGCAAGATCGAGGAGGCCCTGAAGCTGTTCAAGGAGATGGAGGAGAAGGGCATCACCCCCAGCGAGCTGACGATGTCTTC
pL_9	PPR2.0	A	G	GAAGACATGTGGTGACATACACCACACTGATCGACGGACTGTGTAAAGCCGGCGACGTGGACGAAGCCCTCGAGCTGTTCAAAGAGATGCGGAGCAAGGGCGTGAAGCCCAACGTGGTCACATACACCACCCTGATCGACGGCCTGTGCAAGGCCGGCAAGGTGGATGAGGCCCTGGAGCTGTTCGACGAGATGAAGGAGAGGGGCATCAAGCCCGACGAGCTGACGATGTCTTC
pL_9	PPR2.0	A	U	GAAGACATGTGGTGACATACACCACACTGATCGACGGACTGTGTAAAGCCGGCGACGTGGACGAAGCCCTCGAGCTGTTCAAAGAGATGCGGAGCAAGGGCGTGAAGCCCAACGTGGTCACATACAACACCCTGATCGACGGCCTGTGCAAGGCCGGCAGACTGGATGAGGCCGAGGAGCTGCTGGAGGAGATGGAGGAGAAGGGCATCAAGCCCGACGAGCTGACGATGTCTTC
pL_9	PPR2.0	C	A	GAAGACATGTGGTGACATACAACACCCTGATCGACGGCCTGTGCAAGAGCGGCAAGATCGAGGAGGCCCTGAAGCTGTTCAAGGAGATGGAGGAGAAGGGCATCACCCCCAGCGTGGTCACATACACCACACTGATCGACGGACTGTGTAAAGCCGGCGACGTGGACGAAGCCCTCGAGCTGTTCAAAGAGATGCGGAGCAAGGGCGTGAAGCCCAACGAGCTGACGATGTCTTC
pL_9	PPR2.0	C	C	GAAGACATGTGGTGACATACAACACCCTGATCGACGGCCTGTGCAAGAGCGGCAAGATCGAGGAGGCCCTGAAGCTGTTCAAGGAGATGGAGGAGAAGGGCATCACCCCCAGCGTGGTCACATACAACACCCTGATCGACGGCCTGTGCAAGAGCGGCAAGATCGAGGAGGCCCTGAAGCTGTTCAAGGAGATGGAGGAGAAGGGCATCACCCCCAGCGAGCTGACGATGTCTTC
pL_9	PPR2.0	C	G	GAAGACATGTGGTGACATACAACACCCTGATCGACGGCCTGTGCAAGAGCGGCAAGATCGAGGAGGCCCTGAAGCTGTTCAAGGAGATGGAGGAGAAGGGCATCACCCCCAGCGTGGTCACATACACCACCCTGATCGACGGCCTGTGCAAGGCCGGCAAGGTGGATGAGGCCCTGGAGCTGTTCGACGAGATGAAGGAGAGGGGCATCAAGCCCGACGAGCTGACGATGTCTTC
pL_9	PPR2.0	C	U	GAAGACATGTGGTGACATACAACACCCTGATCGACGGCCTGTGCAAGAGCGGCAAGATCGAGGAGGCCCTGAAGCTGTTCAAGGAGATGGAGGAGAAGGGCATCACCCCCAGCGTGGTCACATACAACACCCTGATCGACGGCCTGTGCAAGGCCGGCAGACTGGATGAGGCCGAGGAGCTGCTGGAGGAGATGGAGGAGAAGGGCATCAAGCCCGACGAGCTGACGATGTCTTC
pL_9	PPR2.0	G	A	GAAGACATGTGGTGACATACACCACCCTGATCGACGGCCTGTGCAAGGCCGGCAAAGTGGACGAGGCCCTGGAGCTGTTCGACGAGATGAAGGAGAGGGGCATCAAGCCCGACGTGGTCACATACACCACACTGATCGACGGACTGTGTAAAGCCGGCGACGTGGACGAAGCCCTCGAGCTGTTCAAAGAGATGCGGAGCAAGGGCGTGAAGCCCAACGAGCTGACGATGTCTTC
pL_9	PPR2.0	G	C	GAAGACATGTGGTGACATACACCACCCTGATCGACGGCCTGTGCAAGGCCGGCAAAGTGGACGAGGCCCTGGAGCTGTTCGACGAGATGAAGGAGAGGGGCATCAAGCCCGACGTGGTCACATACAACACCCTGATCGACGGCCTGTGCAAGAGCGGCAAGATCGAGGAGGCCCTGAAGCTGTTCAAGGAGATGGAGGAGAAGGGCATCACCCCCAGCGAGCTGACGATGTCTTC
pL_9	PPR2.0	G	G	GAAGACATGTGGTGACATACACCACCCTGATCGACGGCCTGTGCAAGGCCGGCAAAGTGGACGAGGCCCTGGAGCTGTTCGACGAGATGAAGGAGAGGGGCATCAAGCCCGACGTGGTCACATACACCACCCTGATCGACGGCCTGTGCAAGGCCGGCAAGGTGGATGAGGCCCTGGAGCTGTTCGACGAGATGAAGGAGAGGGGCATCAAGCCCGACGAGCTGACGATGTCTTC
pL_9	PPR2.0	G	U	GAAGACATGTGGTGACATACACCACCCTGATCGACGGCCTGTGCAAGGCCGGCAAAGTGGACGAGGCCCTGGAGCTGTTCGACGAGATGAAGGAGAGGGGCATCAAGCCCGACGTGGTCACATACAACACCCTGATCGACGGCCTGTGCAAGGCCGGCAGACTGGATGAGGCCGAGGAGCTGCTGGAGGAGATGGAGGAGAAGGGCATCAAGCCCGACGAGCTGACGATGTCTTC
pL_9	PPR2.0	U	A	GAAGACATGTGGTGACATACAACACCCTGATCGACGGCCTGTGCAAGGCCGGCAGACTGGATGAGGCCGAGGAGCTGCTGGAGGAGATGGAGGAGAAGGGCATCAAGCCCGACGTGGTCACATACACCACACTGATCGACGGACTGTGTAAAGCCGGCGACGTGGACGAAGCCCTCGAGCTGTTCAAAGAGATGCGGAGCAAGGGCGTGAAGCCCAACGAGCTGACGATGTCTTC
pL_9	PPR2.0	U	C	GAAGACATGTGGTGACATACAACACCCTGATCGACGGCCTGTGCAAGGCCGGCAGACTGGATGAGGCCGAGGAGCTGCTGGAGGAGATGGAGGAGAAGGGCATCAAGCCCGACGTGGTCACATACAACACCCTGATCGACGGCCTGTGCAAGAGCGGCAAGATCGAGGAGGCCCTGAAGCTGTTCAAGGAGATGGAGGAGAAGGGCATCACCCCCAGCGAGCTGACGATGTCTTC
pL_9	PPR2.0	U	G	GAAGACATGTGGTGACATACAACACCCTGATCGACGGCCTGTGCAAGGCCGGCAGACTGGATGAGGCCGAGGAGCTGCTGGAGGAGATGGAGGAGAAGGGCATCAAGCCCGACGTGGTCACATACACCACCCTGATCGACGGCCTGTGCAAGGCCGGCAAGGTGGATGAGGCCCTGGAGCTGTTCGACGAGATGAAGGAGAGGGGCATCAAGCCCGACGAGCTGACGATGTCTTC
pL_9	PPR2.0	U	U	GAAGACATGTGGTGACATACAACACCCTGATCGACGGCCTGTGCAAGGCCGGCAGACTGGATGAGGCCGAGGAGCTGCTGGAGGAGATGGAGGAGAAGGGCATCAAGCCCGACGTGGTCACATACAACACCCTGATCGACGGCCTGTGCAAGGCCGGCAGACTGGATGAGGCCGAGGAGCTGCTGGAGGAGATGGAGGAGAAGGGCATCAAGCCCGACGAGCTGACGATGTCTTC
pL_1	PPR3.0	A	A	GAAGACATAAACTCCGTGGTCACATACACCACCAACATCGACCAGCTCTGTAAGGCCGGCAAGGTGGATGAGGCCCTCGAACTGTTCAAGGAGATGAGGTCCAAGGGCGTGAAGCCCAACGTGGTGACCTACACCACACTGATCGACGGACTGTGCAAGGCCGGCAAAGTGGATGAGGCTCTGGAGCTGTTTAAGGAAATGAGAAGCAAGGGCGTCAAGCCCAACGTGGTCACATAATGTCTTC
pL_1	PPR3.0	A	C	GAAGACATAAACTCCGTGGTCACATACACCACCAACATCGACCAGCTGTGCAAGGCCGGCAAGGTGGATGAGGCTCTGGAACTGTTCAAGGAGATGAGGAGCAAGGGCGTGAAGCCCAACGTGGTGACCTACAACACACTGATCGACGGACTGTGCAAGAGCGGCAAGATCGAGGAGGCTCTGAAGCTGTTTAAGGAGATGGAGGAGAAGGGCATCACCCCCAGCGTGGTCACATAATGTCTTC
pL_1	PPR3.0	A	G	GAAGACATAAACTCCGTGGTCACATACACCACCAACATCGACCAGCTGTGCAAAGCCGGCAAGGTGGATGAAGCTCTGGAGCTGTTCAAGGAGATGAGAAGCAAGGGCGTGAAGCCCAACGTGGTGACCTACACCACACTGATCGACGGACTGTGCAAGGCCGGAAAGGTGGACGAGGCTCTGGAACTGTTCGACGAGATGAAGGAGAGGGGCATCAAGCCCGACGTGGTCACATAATGTCTTC
pL_1	PPR3.0	A	U	GAAGACATAAACTCCGTGGTCACATACACCACCAACATCGACCAGCTCTGCAAGGCCGGCAAGGTGGATGAGGCTCTGGAGCTGTTCAAGGAGATGAGAAGCAAGGGCGTGAAGCCCAACGTGGTGACCTACAACACACTGATCGACGGACTGTGCAAAGCCGGCAGACTGGACGAGGCCGAGGAGCTGCTGGAGGAGATGGAGGAGAAGGGCATCAAGCCCGACGTGGTCACATAATGTCTTC
pL_1	PPR3.0	C	A	GAAGACATAAACTCCGTGGTCACATACAACACCAACATCGACCAGCTGTGCAAAAGCGGCAAGATCGAGGAGGCTCTGAAACTGTTCAAGGAGATGGAGGAGAAGGGCATCACCCCCAGCGTGGTGACCTACACCACACTGATCGACGGACTGTGCAAGGCCGGAAAGGTGGACGAGGCTCTGGAGCTGTTTAAGGAGATGAGGTCCAAGGGCGTGAAGCCCAACGTGGTCACATAATGTCTTC
pL_1	PPR3.0	C	C	GAAGACATAAACTCCGTGGTCACATACAACACCAACATCGACCAGTTATGTAAAAGCGGCAAGATCGAAGAGGCTTTAAAGCTGTTTAAAGAGATGGAGGAGAAGGGTATCACCCCCAGCGTGGTGACCTACAACACTTTAATCGACGGTTTATGCAAGAGCGGTAAGATTGAGGAGGCTCTGAAGTTATTCAAGGAGATGGAAGAGAAAGGCATCACTCCCAGCGTGGTCACATAATGTCTTC
pL_1	PPR3.0	C	G	GAAGACATAAACTCCGTGGTCACATACAACACCAACATCGACCAGCTGTGCAAGAGCGGCAAGATCGAGGAGGCTTTAAAGCTGTTCAAGGAGATGGAGGAGAAGGGCATCACCCCCTCCGTGGTGACCTACACCACTTTAATCGACGGTTTATGCAAGGCCGGAAAGGTGGACGAGGCTTTAGAGCTGTTCGACGAGATGAAGGAGAGGGGCATCAAGCCCGACGTGGTCACATAATGTCTTC
pL_1	PPR3.0	C	U	GAAGACATAAACTCCGTGGTCACATACAACACCAACATCGACCAGCTGTGCAAGAGCGGCAAGATCGAGGAGGCTTTAAAGCTGTTCAAAGAGATGGAGGAGAAGGGCATCACCCCCAGCGTGGTGACCTACAACACTTTAATCGACGGTTTATGCAAGGCCGGCAGACTGGATGAGGCCGAGGAGCTGCTGGAGGAGATGGAGGAAAAGGGCATCAAGCCCGACGTGGTCACATAATGTCTTC
pL_1	PPR3.0	G	A	GAAGACATAAACTCCGTGGTCACATACACCACCAACATCGACCAGCTCTGCAAGGCCGGCAAGGTGGATGAGGCTCTGGAGCTGTTCGACGAGATGAAGGAGAGAGGCATCAAGCCCGACGTGGTGACCTACACCACACTGATCGACGGACTGTGCAAGGCTGGCAAGGTGGACGAAGCTCTGGAACTGTTCAAGGAGATGAGGAGCAAGGGCGTGAAGCCCAACGTGGTCACATAATGTCTTC
pL_1	PPR3.0	G	C	GAAGACATAAACTCCGTGGTCACATACACCACCAACATCGACCAGCTGTGCAAGGCCGGCAAAGTGGACGAGGCTTTAGAGCTGTTCGACGAGATGAAGGAGAGGGGCATCAAGCCCGACGTGGTGACCTACAACACTTTAATCGACGGTTTATGCAAGAGCGGCAAGATCGAGGAGGCTTTAAAGCTGTTCAAGGAGATGGAGGAGAAGGGCATCACCCCCAGCGTGGTCACATAATGTCTTC
pL_1	PPR3.0	G	G	GAAGACATAAACTCCGTGGTCACATACACCACCAACATCGACCAGTTATGCAAGGCCGGCAAGGTGGATGAAGCTCTGGAGCTGTTCGACGAGATGAAGGAAAGGGGCATCAAGCCCGACGTGGTGACCTACACCACTTTAATCGACGGTTTATGCAAAGCCGGAAAGGTGGACGAGGCTTTAGAGCTGTTTGACGAGATGAAAGAGAGGGGCATTAAGCCCGACGTGGTCACATAATGTCTTC
pL_1	PPR3.0	G	U	GAAGACATAAACTCCGTGGTCACATACACCACCAACATCGACCAGTTATGCAAGGCCGGCAAAGTGGACGAGGCTTTAGAGCTGTTCGACGAGATGAAGGAGCGTGGCATCAAGCCCGACGTGGTGACCTACAACACTTTAATCGACGGTTTATGCAAAGCCGGCAGACTGGATGAGGCCGAGGAGCTGCTGGAGGAGATGGAGGAGAAGGGCATTAAGCCCGACGTGGTCACATAATGTCTTC
pL_1	PPR3.0	U	A	GAAGACATAAACTCCGTGGTCACATACAACACCAACATCGACCAGCTCTGCAAGGCCGGCAGACTGGACGAGGCCGAAGAGCTGCTGGAGGAGATGGAGGAGAAGGGCATCAAGCCCGACGTGGTGACCTACACCACACTGATCGACGGACTGTGCAAAGCCGGCAAGGTGGATGAGGCTCTGGAGCTGTTCAAGGAGATGAGGAGCAAGGGCGTGAAGCCCAATGTGGTCACATAATGTCTTC
pL_1	PPR3.0	U	C	GAAGACATAAACTCCGTGGTCACATACAACACCAACATCGACCAGCTGTGCAAGGCCGGCAGACTGGATGAGGCCGAGGAGCTGCTGGAAGAGATGGAGGAGAAGGGCATCAAGCCCGACGTGGTGACCTACAACACTTTAATCGACGGTTTATGCAAGAGCGGCAAGATCGAGGAGGCTTTAAAGCTGTTCAAGGAGATGGAGGAAAAGGGCATCACCCCCAGCGTGGTCACATAATGTCTTC
pL_1	PPR3.0	U	G	GAAGACATAAACTCCGTGGTCACATACAACACCAACATCGACCAGCTGTGCAAGGCTGGTCGTCTGGACGAGGCTGAGGAGCTGCTGGAGGAGATGGAGGAGAAAGGCATCAAGCCCGACGTGGTGACCTACACCACTTTAATCGACGGTTTATGCAAGGCCGGCAAGGTGGATGAGGCTTTAGAGCTGTTCGACGAGATGAAGGAGAGGGGCATTAAGCCCGACGTGGTCACATAATGTCTTC
pL_1	PPR3.0	U	U	GAAGACATAAACTCCGTGGTCACATACAACACCAACATCGACCAGTTATGCAAGGCCGGCAGACTGGATGAAGCTGAGGAGCTGCTGGAGGAGATGGAGGAAAAGGGCATCAAGCCCGACGTGGTGACCTACAACACTTTAATCGACGGTTTATGCAAAGCCGGTCGTTTAGATGAAGCCGAGGAGCTGTTAGAGGAGATGGAAGAGAAGGGCATTAAGCCCGACGTGGTCACATA<>ATGTCTTC
pL_2	PPR3.0	A	A	GAAGACATCATACACCACACTGATCGACGGACTGTGTAAAGCCGGCAAGGTGGACGAAGCCCTCGAGCTGTTCAAAGAGATGCGGAGCAAGGGCGTGAAGCCCAACGTGGTCACATACACCACACTGATCGACGGACTGTGTAAAGCCGGCAAGGTGGACGAAGCCCTCGAGCTGTTCAAAGAGATGCGGAGCAAGGGCGTGAAGCCCAACGTGGTTACATATGTCTTC
pL_2	PPR3.0	A	C	GAAGACATCATACACCACACTGATCGACGGACTGTGTAAAGCCGGCAAGGTGGACGAAGCCCTCGAGCTGTTCAAAGAGATGCGGAGCAAGGGCGTGAAGCCCAACGTGGTCACATACAACACCCTGATCGACGGCCTGTGCAAGAGCGGCAAGATCGAGGAGGCCCTGAAGCTGTTCAAGGAGATGGAGGAGAAGGGCATCACCCCCAGCGTGGTTACATATGTCTTC
pL_2	PPR3.0	A	G	GAAGACATCATACACCACACTGATCGACGGACTGTGTAAAGCCGGCAAGGTGGACGAAGCCCTCGAGCTGTTCAAAGAGATGCGGAGCAAGGGCGTGAAGCCCAACGTGGTCACATACACCACCCTGATCGACGGCCTGTGCAAGGCCGGCAAGGTGGATGAGGCCCTGGAGCTGTTCGACGAGATGAAGGAGAGGGGCATCAAGCCCGACGTGGTTACATATGTCTTC
pL_2	PPR3.0	A	U	GAAGACATCATACACCACACTGATCGACGGACTGTGTAAAGCCGGCAAGGTGGACGAAGCCCTCGAGCTGTTCAAAGAGATGCGGAGCAAGGGCGTGAAGCCCAACGTGGTCACATACAACACCCTGATCGACGGCCTGTGCAAGGCCGGCAGACTGGATGAGGCCGAGGAGCTGCTGGAGGAGATGGAGGAGAAGGGCATCAAGCCCGACGTGGTTACATATGTCTTC
pL_2	PPR3.0	C	A	GAAGACATCATACAACACCCTGATCGACGGCCTGTGCAAGAGCGGCAAGATCGAGGAGGCCCTGAAGCTGTTCAAGGAGATGGAGGAGAAGGGCATCACCCCCAGCGTGGTCACATACACCACACTGATCGACGGACTGTGTAAAGCCGGCAAGGTGGACGAAGCCCTCGAGCTGTTCAAAGAGATGCGGAGCAAGGGCGTGAAGCCCAACGTGGTTACATATGTCTTC
pL_2	PPR3.0	C	C	GAAGACATCATACAACACCCTGATCGACGGCCTGTGCAAGAGCGGCAAGATCGAGGAGGCCCTGAAGCTGTTCAAGGAGATGGAGGAGAAGGGCATCACCCCCAGCGTGGTCACATACAACACCCTGATCGACGGCCTGTGCAAGAGCGGCAAGATCGAGGAGGCCCTGAAGCTGTTCAAGGAGATGGAGGAGAAGGGCATCACCCCCAGCGTGGTTACATATGTCTTC
pL_2	PPR3.0	C	G	GAAGACATCATACAACACCCTGATCGACGGCCTGTGCAAGAGCGGCAAGATCGAGGAGGCCCTGAAGCTGTTCAAGGAGATGGAGGAGAAGGGCATCACCCCCAGCGTGGTCACATACACCACCCTGATCGACGGCCTGTGCAAGGCCGGCAAGGTGGATGAGGCCCTGGAGCTGTTCGACGAGATGAAGGAGAGGGGCATCAAGCCCGACGTGGTTACATATGTCTTC
pL_2	PPR3.0	C	U	GAAGACATCATACAACACCCTGATCGACGGCCTGTGCAAGAGCGGCAAGATCGAGGAGGCCCTGAAGCTGTTCAAGGAGATGGAGGAGAAGGGCATCACCCCCAGCGTGGTCACATACAACACCCTGATCGACGGCCTGTGCAAGGCCGGCAGACTGGATGAGGCCGAGGAGCTGCTGGAGGAGATGGAGGAGAAGGGCATCAAGCCCGACGTGGTTACATATGTCTTC
pL_2	PPR3.0	G	A	GAAGACATCATACACCACCCTGATCGACGGCCTGTGCAAGGCCGGCAAAGTGGACGAGGCCCTGGAGCTGTTCGACGAGATGAAGGAGAGGGGCATCAAGCCCGACGTGGTCACATACACCACACTGATCGACGGACTGTGTAAAGCCGGCAAGGTGGACGAAGCCCTCGAGCTGTTCAAAGAGATGCGGAGCAAGGGCGTGAAGCCCAACGTGGTTACATATGTCTTC
pL_2	PPR3.0	G	C	GAAGACATCATACACCACCCTGATCGACGGCCTGTGCAAGGCCGGCAAAGTGGACGAGGCCCTGGAGCTGTTCGACGAGATGAAGGAGAGGGGCATCAAGCCCGACGTGGTCACATACAACACCCTGATCGACGGCCTGTGCAAGAGCGGCAAGATCGAGGAGGCCCTGAAGCTGTTCAAGGAGATGGAGGAGAAGGGCATCACCCCCAGCGTGGTTACATATGTCTTC
pL_2	PPR3.0	G	G	GAAGACATCATACACCACCCTGATCGACGGCCTGTGCAAGGCCGGCAAAGTGGACGAGGCCCTGGAGCTGTTCGACGAGATGAAGGAGAGGGGCATCAAGCCCGACGTGGTCACATACACCACCCTGATCGACGGCCTGTGCAAGGCCGGCAAGGTGGATGAGGCCCTGGAGCTGTTCGACGAGATGAAGGAGAGGGGCATCAAGCCCGACGTGGTTACATATGTCTTC
pL_2	PPR3.0	G	U	GAAGACATCATACACCACCCTGATCGACGGCCTGTGCAAGGCCGGCAAAGTGGACGAGGCCCTGGAGCTGTTCGACGAGATGAAGGAGAGGGGCATCAAGCCCGACGTGGTCACATACAACACCCTGATCGACGGCCTGTGCAAGGCCGGCAGACTGGATGAGGCCGAGGAGCTGCTGGAGGAGATGGAGGAGAAGGGCATCAAGCCCGACGTGGTTACATATGTCTTC
pL_2	PPR3.0	U	A	GAAGACATCATACAACACCCTGATCGACGGCCTGTGCAAGGCCGGCAGACTGGATGAGGCCGAGGAGCTGCTGGAGGAGATGGAGGAGAAGGGCATCAAGCCCGACGTGGTCACATACACCACACTGATCGACGGACTGTGTAAAGCCGGCAAGGTGGACGAAGCCCTCGAGCTGTTCAAAGAGATGCGGAGCAAGGGCGTGAAGCCCAACGTGGTTACATATGTCTTC
pL_2	PPR3.0	U	C	GAAGACATCATACAACACCCTGATCGACGGCCTGTGCAAGGCCGGCAGACTGGATGAGGCCGAGGAGCTGCTGGAGGAGATGGAGGAGAAGGGCATCAAGCCCGACGTGGTCACATACAACACCCTGATCGACGGCCTGTGCAAGAGCGGCAAGATCGAGGAGGCCCTGAAGCTGTTCAAGGAGATGGAGGAGAAGGGCATCACCCCCAGCGTGGTTACATATGTCTTC
pL_2	PPR3.0	U	G	GAAGACATCATACAACACCCTGATCGACGGCCTGTGCAAGGCCGGCAGACTGGATGAGGCCGAGGAGCTGCTGGAGGAGATGGAGGAGAAGGGCATCAAGCCCGACGTGGTCACATACACCACCCTGATCGACGGCCTGTGCAAGGCCGGCAAGGTGGATGAGGCCCTGGAGCTGTTCGACGAGATGAAGGAGAGGGGCATCAAGCCCGACGTGGTTACATATGTCTTC
pL_2	PPR3.0	U	U	GAAGACATCATACAACACCCTGATCGACGGCCTGTGCAAGGCCGGCAGACTGGATGAGGCCGAGGAGCTGCTGGAGGAGATGGAGGAGAAGGGCATCAAGCCCGACGTGGTCACATACAACACCCTGATCGACGGCCTGTGCAAGGCCGGCAGACTGGATGAGGCCGAGGAGCTGCTGGAGGAGATGGAGGAGAAGGGCATCAAGCCCGACGTGGTTACATATGTCTTC
pL_3	PPR3.0	A	A	GAAGACATACATACACCACACTGATCGACGGACTGTGTAAAGCCGGCAAGGTGGACGAAGCCCTCGAGCTGTTCAAAGAGATGCGGAGCAAGGGCGTGAAGCCCAACGTGGTCACATACACCACACTGATCGACGGACTGTGTAAAGCCGGCAAGGTGGACGAAGCCCTCGAGCTGTTCAAAGAGATGCGGAGCAAGGGCGTGAAGCCCAACGTGGTTACAATGTCTTC
pL_3	PPR3.0	A	C	GAAGACATACATACACCACACTGATCGACGGACTGTGTAAAGCCGGCAAGGTGGACGAAGCCCTCGAGCTGTTCAAAGAGATGCGGAGCAAGGGCGTGAAGCCCAACGTGGTCACATACAACACCCTGATCGACGGCCTGTGCAAGAGCGGCAAGATCGAGGAGGCCCTGAAGCTGTTCAAGGAGATGGAGGAGAAGGGCATCACCCCCAGCGTGGTTACAATGTCTTC
pL_3	PPR3.0	A	G	GAAGACATACATACACCACACTGATCGACGGACTGTGTAAAGCCGGCAAGGTGGACGAAGCCCTCGAGCTGTTCAAAGAGATGCGGAGCAAGGGCGTGAAGCCCAACGTGGTCACATACACCACCCTGATCGACGGCCTGTGCAAGGCCGGCAAGGTGGATGAGGCCCTGGAGCTGTTCGACGAGATGAAGGAGAGGGGCATCAAGCCCGACGTGGTTACAATGTCTTC
pL_3	PPR3.0	A	U	GAAGACATACATACACCACACTGATCGACGGACTGTGTAAAGCCGGCAAGGTGGACGAAGCCCTCGAGCTGTTCAAAGAGATGCGGAGCAAGGGCGTGAAGCCCAACGTGGTCACATACAACACCCTGATCGACGGCCTGTGCAAGGCCGGCAGACTGGATGAGGCCGAGGAGCTGCTGGAGGAGATGGAGGAGAAGGGCATCAAGCCCGACGTGGTTACAATGTCTTC
pL_3	PPR3.0	C	A	GAAGACATACATACAACACCCTGATCGACGGCCTGTGCAAGAGCGGCAAGATCGAGGAGGCCCTGAAGCTGTTCAAGGAGATGGAGGAGAAGGGCATCACCCCCAGCGTGGTCACATACACCACACTGATCGACGGACTGTGTAAAGCCGGCAAGGTGGACGAAGCCCTCGAGCTGTTCAAAGAGATGCGGAGCAAGGGCGTGAAGCCCAACGTGGTTACAATGTCTTC
pL_3	PPR3.0	C	C	GAAGACATACATACAACACCCTGATCGACGGCCTGTGCAAGAGCGGCAAGATCGAGGAGGCCCTGAAGCTGTTCAAGGAGATGGAGGAGAAGGGCATCACCCCCAGCGTGGTCACATACAACACCCTGATCGACGGCCTGTGCAAGAGCGGCAAGATCGAGGAGGCCCTGAAGCTGTTCAAGGAGATGGAGGAGAAGGGCATCACCCCCAGCGTGGTTACAATGTCTTC
pL_3	PPR3.0	C	G	GAAGACATACATACAACACCCTGATCGACGGCCTGTGCAAGAGCGGCAAGATCGAGGAGGCCCTGAAGCTGTTCAAGGAGATGGAGGAGAAGGGCATCACCCCCAGCGTGGTCACATACACCACCCTGATCGACGGCCTGTGCAAGGCCGGCAAGGTGGATGAGGCCCTGGAGCTGTTCGACGAGATGAAGGAGAGGGGCATCAAGCCCGACGTGGTTACAATGTCTTC
pL_3	PPR3.0	C	U	GAAGACATACATACAACACCCTGATCGACGGCCTGTGCAAGAGCGGCAAGATCGAGGAGGCCCTGAAGCTGTTCAAGGAGATGGAGGAGAAGGGCATCACCCCCAGCGTGGTCACATACAACACCCTGATCGACGGCCTGTGCAAGGCCGGCAGACTGGATGAGGCCGAGGAGCTGCTGGAGGAGATGGAGGAGAAGGGCATCAAGCCCGACGTGGTTACAATGTCTTC
pL_3	PPR3.0	G	A	GAAGACATACATACACCACCCTGATCGACGGCCTGTGCAAGGCCGGCAAAGTGGACGAGGCCCTGGAGCTGTTCGACGAGATGAAGGAGAGGGGCATCAAGCCCGACGTGGTCACATACACCACACTGATCGACGGACTGTGTAAAGCCGGCAAGGTGGACGAAGCCCTCGAGCTGTTCAAAGAGATGCGGAGCAAGGGCGTGAAGCCCAACGTGGTTACAATGTCTTC
pL_3	PPR3.0	G	C	GAAGACATACATACACCACCCTGATCGACGGCCTGTGCAAGGCCGGCAAAGTGGACGAGGCCCTGGAGCTGTTCGACGAGATGAAGGAGAGGGGCATCAAGCCCGACGTGGTCACATACAACACCCTGATCGACGGCCTGTGCAAGAGCGGCAAGATCGAGGAGGCCCTGAAGCTGTTCAAGGAGATGGAGGAGAAGGGCATCACCCCCAGCGTGGTTACAATGTCTTC
pL_3	PPR3.0	G	G	GAAGACATACATACACCACCCTGATCGACGGCCTGTGCAAGGCCGGCAAAGTGGACGAGGCCCTGGAGCTGTTCGACGAGATGAAGGAGAGGGGCATCAAGCCCGACGTGGTCACATACACCACCCTGATCGACGGCCTGTGCAAGGCCGGCAAGGTGGATGAGGCCCTGGAGCTGTTCGACGAGATGAAGGAGAGGGGCATCAAGCCCGACGTGGTTACAATGTCTTC
pL_3	PPR3.0	G	U	GAAGACATACATACACCACCCTGATCGACGGCCTGTGCAAGGCCGGCAAAGTGGACGAGGCCCTGGAGCTGTTCGACGAGATGAAGGAGAGGGGCATCAAGCCCGACGTGGTCACATACAACACCCTGATCGACGGCCTGTGCAAGGCCGGCAGACTGGATGAGGCCGAGGAGCTGCTGGAGGAGATGGAGGAGAAGGGCATCAAGCCCGACGTGGTTACAATGTCTTC
pL_3	PPR3.0	U	A	GAAGACATACATACAACACCCTGATCGACGGCCTGTGCAAGGCCGGCAGACTGGATGAGGCCGAGGAGCTGCTGGAGGAGATGGAGGAGAAGGGCATCAAGCCCGACGTGGTCACATACACCACACTGATCGACGGACTGTGTAAAGCCGGCAAGGTGGACGAAGCCCTCGAGCTGTTCAAAGAGATGCGGAGCAAGGGCGTGAAGCCCAACGTGGTTACAATGTCTTC
pL_3	PPR3.0	U	C	GAAGACATACATACAACACCCTGATCGACGGCCTGTGCAAGGCCGGCAGACTGGATGAGGCCGAGGAGCTGCTGGAGGAGATGGAGGAGAAGGGCATCAAGCCCGACGTGGTCACATACAACACCCTGATCGACGGCCTGTGCAAGAGCGGCAAGATCGAGGAGGCCCTGAAGCTGTTCAAGGAGATGGAGGAGAAGGGCATCACCCCCAGCGTGGTTACAATGTCTTC
pL_3	PPR3.0	U	G	GAAGACATACATACAACACCCTGATCGACGGCCTGTGCAAGGCCGGCAGACTGGATGAGGCCGAGGAGCTGCTGGAGGAGATGGAGGAGAAGGGCATCAAGCCCGACGTGGTCACATACACCACCCTGATCGACGGCCTGTGCAAGGCCGGCAAGGTGGATGAGGCCCTGGAGCTGTTCGACGAGATGAAGGAGAGGGGCATCAAGCCCGACGTGGTTACAATGTCTTC
pL_3	PPR3.0	U	U	GAAGACATACATACAACACCCTGATCGACGGCCTGTGCAAGGCCGGCAGACTGGATGAGGCCGAGGAGCTGCTGGAGGAGATGGAGGAGAAGGGCATCAAGCCCGACGTGGTCACATACAACACCCTGATCGACGGCCTGTGCAAGGCCGGCAGACTGGATGAGGCCGAGGAGCTGCTGGAGGAGATGGAGGAGAAGGGCATCAAGCCCGACGTGGTTACAATGTCTTC
pL_4	PPR3.0	A	A	GAAGACATTACATACACCACACTGATCGACGGACTGTGTAAAGCCGGCAAGGTGGACGAAGCCCTCGAGCTGTTCAAAGAGATGCGGAGCAAGGGCGTGAAGCCCAACGTGGTCACATACACCACACTGATCGACGGACTGTGTAAAGCCGGCAAGGTGGACGAAGCCCTCGAGCTGTTCAAAGAGATGCGGAGCAAGGGCGTGAAGCCCAACGTGGTGACATGTCTTC
pL_4	PPR3.0	A	C	GAAGACATTACATACACCACACTGATCGACGGACTGTGTAAAGCCGGCAAGGTGGACGAAGCCCTCGAGCTGTTCAAAGAGATGCGGAGCAAGGGCGTGAAGCCCAACGTGGTCACATACAACACCCTGATCGACGGCCTGTGCAAGAGCGGCAAGATCGAGGAGGCCCTGAAGCTGTTCAAGGAGATGGAGGAGAAGGGCATCACCCCCAGCGTGGTGACATGTCTTC
pL_4	PPR3.0	A	G	GAAGACATTACATACACCACACTGATCGACGGACTGTGTAAAGCCGGCAAGGTGGACGAAGCCCTCGAGCTGTTCAAAGAGATGCGGAGCAAGGGCGTGAAGCCCAACGTGGTCACATACACCACCCTGATCGACGGCCTGTGCAAGGCCGGCAAGGTGGATGAGGCCCTGGAGCTGTTCGACGAGATGAAGGAGAGGGGCATCAAGCCCGACGTGGTGACATGTCTTC
pL_4	PPR3.0	A	U	GAAGACATTACATACACCACACTGATCGACGGACTGTGTAAAGCCGGCAAGGTGGACGAAGCCCTCGAGCTGTTCAAAGAGATGCGGAGCAAGGGCGTGAAGCCCAACGTGGTCACATACAACACCCTGATCGACGGCCTGTGCAAGGCCGGCAGACTGGATGAGGCCGAGGAGCTGCTGGAGGAGATGGAGGAGAAGGGCATCAAGCCCGACGTGGTGACATGTCTTC
pL_4	PPR3.0	C	A	GAAGACATTACATACAACACCCTGATCGACGGCCTGTGCAAGAGCGGCAAGATCGAGGAGGCCCTGAAGCTGTTCAAGGAGATGGAGGAGAAGGGCATCACCCCCAGCGTGGTCACATACACCACACTGATCGACGGACTGTGTAAAGCCGGCAAGGTGGACGAAGCCCTCGAGCTGTTCAAAGAGATGCGGAGCAAGGGCGTGAAGCCCAACGTGGTGACATGTCTTC
pL_4	PPR3.0	C	C	GAAGACATTACATACAACACCCTGATCGACGGCCTGTGCAAGAGCGGCAAGATCGAGGAGGCCCTGAAGCTGTTCAAGGAGATGGAGGAGAAGGGCATCACCCCCAGCGTGGTCACATACAACACCCTGATCGACGGCCTGTGCAAGAGCGGCAAGATCGAGGAGGCCCTGAAGCTGTTCAAGGAGATGGAGGAGAAGGGCATCACCCCCAGCGTGGTGACATGTCTTC
pL_4	PPR3.0	C	G	GAAGACATTACATACAACACCCTGATCGACGGCCTGTGCAAGAGCGGCAAGATCGAGGAGGCCCTGAAGCTGTTCAAGGAGATGGAGGAGAAGGGCATCACCCCCAGCGTGGTCACATACACCACCCTGATCGACGGCCTGTGCAAGGCCGGCAAGGTGGATGAGGCCCTGGAGCTGTTCGACGAGATGAAGGAGAGGGGCATCAAGCCCGACGTGGTGACATGTCTTC
pL_4	PPR3.0	C	U	GAAGACATTACATACAACACCCTGATCGACGGCCTGTGCAAGAGCGGCAAGATCGAGGAGGCCCTGAAGCTGTTCAAGGAGATGGAGGAGAAGGGCATCACCCCCAGCGTGGTCACATACAACACCCTGATCGACGGCCTGTGCAAGGCCGGCAGACTGGATGAGGCCGAGGAGCTGCTGGAGGAGATGGAGGAGAAGGGCATCAAGCCCGACGTGGTGACATGTCTTC
pL_4	PPR3.0	G	A	GAAGACATTACATACACCACCCTGATCGACGGCCTGTGCAAGGCCGGCAAAGTGGACGAGGCCCTGGAGCTGTTCGACGAGATGAAGGAGAGGGGCATCAAGCCCGACGTGGTCACATACACCACACTGATCGACGGACTGTGTAAAGCCGGCAAGGTGGACGAAGCCCTCGAGCTGTTCAAAGAGATGCGGAGCAAGGGCGTGAAGCCCAACGTGGTGACATGTCTTC
pL_4	PPR3.0	G	C	GAAGACATTACATACACCACCCTGATCGACGGCCTGTGCAAGGCCGGCAAAGTGGACGAGGCCCTGGAGCTGTTCGACGAGATGAAGGAGAGGGGCATCAAGCCCGACGTGGTCACATACAACACCCTGATCGACGGCCTGTGCAAGAGCGGCAAGATCGAGGAGGCCCTGAAGCTGTTCAAGGAGATGGAGGAGAAGGGCATCACCCCCAGCGTGGTGACATGTCTTC
pL_4	PPR3.0	G	G	GAAGACATTACATACACCACCCTGATCGACGGCCTGTGCAAGGCCGGCAAAGTGGACGAGGCCCTGGAGCTGTTCGACGAGATGAAGGAGAGGGGCATCAAGCCCGACGTGGTCACATACACCACCCTGATCGACGGCCTGTGCAAGGCCGGCAAGGTGGATGAGGCCCTGGAGCTGTTCGACGAGATGAAGGAGAGGGGCATCAAGCCCGACGTGGTGACATGTCTTC
pL_4	PPR3.0	G	U	GAAGACATTACATACACCACCCTGATCGACGGCCTGTGCAAGGCCGGCAAAGTGGACGAGGCCCTGGAGCTGTTCGACGAGATGAAGGAGAGGGGCATCAAGCCCGACGTGGTCACATACAACACCCTGATCGACGGCCTGTGCAAGGCCGGCAGACTGGATGAGGCCGAGGAGCTGCTGGAGGAGATGGAGGAGAAGGGCATCAAGCCCGACGTGGTGACATGTCTTC
pL_4	PPR3.0	U	A	GAAGACATTACATACAACACCCTGATCGACGGCCTGTGCAAGGCCGGCAGACTGGATGAGGCCGAGGAGCTGCTGGAGGAGATGGAGGAGAAGGGCATCAAGCCCGACGTGGTCACATACACCACACTGATCGACGGACTGTGTAAAGCCGGCAAGGTGGACGAAGCCCTCGAGCTGTTCAAAGAGATGCGGAGCAAGGGCGTGAAGCCCAACGTGGTGACATGTCTTC
pL_4	PPR3.0	U	C	GAAGACATTACATACAACACCCTGATCGACGGCCTGTGCAAGGCCGGCAGACTGGATGAGGCCGAGGAGCTGCTGGAGGAGATGGAGGAGAAGGGCATCAAGCCCGACGTGGTCACATACAACACCCTGATCGACGGCCTGTGCAAGAGCGGCAAGATCGAGGAGGCCCTGAAGCTGTTCAAGGAGATGGAGGAGAAGGGCATCACCCCCAGCGTGGTGACATGTCTTC
pL_4	PPR3.0	U	G	GAAGACATTACATACAACACCCTGATCGACGGCCTGTGCAAGGCCGGCAGACTGGATGAGGCCGAGGAGCTGCTGGAGGAGATGGAGGAGAAGGGCATCAAGCCCGACGTGGTCACATACACCACCCTGATCGACGGCCTGTGCAAGGCCGGCAAGGTGGATGAGGCCCTGGAGCTGTTCGACGAGATGAAGGAGAGGGGCATCAAGCCCGACGTGGTGACATGTCTTC
pL_4	PPR3.0	U	U	GAAGACATTACATACAACACCCTGATCGACGGCCTGTGCAAGGCCGGCAGACTGGATGAGGCCGAGGAGCTGCTGGAGGAGATGGAGGAGAAGGGCATCAAGCCCGACGTGGTCACATACAACACCCTGATCGACGGCCTGTGCAAGGCCGGCAGACTGGATGAGGCCGAGGAGCTGCTGGAGGAGATGGAGGAGAAGGGCATCAAGCCCGACGTGGTGACATGTCTTC
pL_5	PPR3.0	A	A	GAAGACATTGACATACACCACACTGATCGACGGACTGTGTAAAGCCGGCAAGGTGGACGAAGCCCTCGAGCTGTTCAAAGAGATGCGGAGCAAGGGCGTGAAGCCCAACGTGGTCACATACACCACACTGATCGACGGACTGTGTAAAGCCGGCAAGGTGGACGAAGCCCTCGAGCTGTTCAAAGAGATGCGGAGCAAGGGCGTGAAGCCCAACGTGGTTAATGTCTTC
pL_5	PPR3.0	A	C	GAAGACATTGACATACACCACACTGATCGACGGACTGTGTAAAGCCGGCAAGGTGGACGAAGCCCTCGAGCTGTTCAAAGAGATGCGGAGCAAGGGCGTGAAGCCCAACGTGGTCACATACAACACCCTGATCGACGGCCTGTGCAAGAGCGGCAAGATCGAGGAGGCCCTGAAGCTGTTCAAGGAGATGGAGGAGAAGGGCATCACCCCCAGCGTGGTTAATGTCTTC
pL_5	PPR3.0	A	G	GAAGACATTGACATACACCACACTGATCGACGGACTGTGTAAAGCCGGCAAGGTGGACGAAGCCCTCGAGCTGTTCAAAGAGATGCGGAGCAAGGGCGTGAAGCCCAACGTGGTCACATACACCACCCTGATCGACGGCCTGTGCAAGGCCGGCAAGGTGGATGAGGCCCTGGAGCTGTTCGACGAGATGAAGGAGAGGGGCATCAAGCCCGACGTGGTTAATGTCTTC
pL_5	PPR3.0	A	U	GAAGACATTGACATACACCACACTGATCGACGGACTGTGTAAAGCCGGCAAGGTGGACGAAGCCCTCGAGCTGTTCAAAGAGATGCGGAGCAAGGGCGTGAAGCCCAACGTGGTCACATACAACACCCTGATCGACGGCCTGTGCAAGGCCGGCAGACTGGATGAGGCCGAGGAGCTGCTGGAGGAGATGGAGGAGAAGGGCATCAAGCCCGACGTGGTTAATGTCTTC
pL_5	PPR3.0	C	A	GAAGACATTGACATACAACACCCTGATCGACGGCCTGTGCAAGAGCGGCAAGATCGAGGAGGCCCTGAAGCTGTTCAAGGAGATGGAGGAGAAGGGCATCACCCCCAGCGTGGTCACATACACCACACTGATCGACGGACTGTGTAAAGCCGGCAAGGTGGACGAAGCCCTCGAGCTGTTCAAAGAGATGCGGAGCAAGGGCGTGAAGCCCAACGTGGTTAATGTCTTC
pL_5	PPR3.0	C	C	GAAGACATTGACATACAACACCCTGATCGACGGCCTGTGCAAGAGCGGCAAGATCGAGGAGGCCCTGAAGCTGTTCAAGGAGATGGAGGAGAAGGGCATCACCCCCAGCGTGGTCACATACAACACCCTGATCGACGGCCTGTGCAAGAGCGGCAAGATCGAGGAGGCCCTGAAGCTGTTCAAGGAGATGGAGGAGAAGGGCATCACCCCCAGCGTGGTTAATGTCTTC
pL_5	PPR3.0	C	G	GAAGACATTGACATACAACACCCTGATCGACGGCCTGTGCAAGAGCGGCAAGATCGAGGAGGCCCTGAAGCTGTTCAAGGAGATGGAGGAGAAGGGCATCACCCCCAGCGTGGTCACATACACCACCCTGATCGACGGCCTGTGCAAGGCCGGCAAGGTGGATGAGGCCCTGGAGCTGTTCGACGAGATGAAGGAGAGGGGCATCAAGCCCGACGTGGTTAATGTCTTC
pL_5	PPR3.0	C	U	GAAGACATTGACATACAACACCCTGATCGACGGCCTGTGCAAGAGCGGCAAGATCGAGGAGGCCCTGAAGCTGTTCAAGGAGATGGAGGAGAAGGGCATCACCCCCAGCGTGGTCACATACAACACCCTGATCGACGGCCTGTGCAAGGCCGGCAGACTGGATGAGGCCGAGGAGCTGCTGGAGGAGATGGAGGAGAAGGGCATCAAGCCCGACGTGGTTAATGTCTTC
pL_5	PPR3.0	G	A	GAAGACATTGACATACACCACCCTGATCGACGGCCTGTGCAAGGCCGGCAAAGTGGACGAGGCCCTGGAGCTGTTCGACGAGATGAAGGAGAGGGGCATCAAGCCCGACGTGGTCACATACACCACACTGATCGACGGACTGTGTAAAGCCGGCAAGGTGGACGAAGCCCTCGAGCTGTTCAAAGAGATGCGGAGCAAGGGCGTGAAGCCCAACGTGGTTAATGTCTTC
pL_5	PPR3.0	G	C	GAAGACATTGACATACACCACCCTGATCGACGGCCTGTGCAAGGCCGGCAAAGTGGACGAGGCCCTGGAGCTGTTCGACGAGATGAAGGAGAGGGGCATCAAGCCCGACGTGGTCACATACAACACCCTGATCGACGGCCTGTGCAAGAGCGGCAAGATCGAGGAGGCCCTGAAGCTGTTCAAGGAGATGGAGGAGAAGGGCATCACCCCCAGCGTGGTTAATGTCTTC
pL_5	PPR3.0	G	G	GAAGACATTGACATACACCACCCTGATCGACGGCCTGTGCAAGGCCGGCAAAGTGGACGAGGCCCTGGAGCTGTTCGACGAGATGAAGGAGAGGGGCATCAAGCCCGACGTGGTCACATACACCACCCTGATCGACGGCCTGTGCAAGGCCGGCAAGGTGGATGAGGCCCTGGAGCTGTTCGACGAGATGAAGGAGAGGGGCATCAAGCCCGACGTGGTTAATGTCTTC
pL_5	PPR3.0	G	U	GAAGACATTGACATACACCACCCTGATCGACGGCCTGTGCAAGGCCGGCAAAGTGGACGAGGCCCTGGAGCTGTTCGACGAGATGAAGGAGAGGGGCATCAAGCCCGACGTGGTCACATACAACACCCTGATCGACGGCCTGTGCAAGGCCGGCAGACTGGATGAGGCCGAGGAGCTGCTGGAGGAGATGGAGGAGAAGGGCATCAAGCCCGACGTGGTTAATGTCTTC
pL_5	PPR3.0	U	A	GAAGACATTGACATACAACACCCTGATCGACGGCCTGTGCAAGGCCGGCAGACTGGATGAGGCCGAGGAGCTGCTGGAGGAGATGGAGGAGAAGGGCATCAAGCCCGACGTGGTCACATACACCACACTGATCGACGGACTGTGTAAAGCCGGCAAGGTGGACGAAGCCCTCGAGCTGTTCAAAGAGATGCGGAGCAAGGGCGTGAAGCCCAACGTGGTTAATGTCTTC
pL_5	PPR3.0	U	C	GAAGACATTGACATACAACACCCTGATCGACGGCCTGTGCAAGGCCGGCAGACTGGATGAGGCCGAGGAGCTGCTGGAGGAGATGGAGGAGAAGGGCATCAAGCCCGACGTGGTCACATACAACACCCTGATCGACGGCCTGTGCAAGAGCGGCAAGATCGAGGAGGCCCTGAAGCTGTTCAAGGAGATGGAGGAGAAGGGCATCACCCCCAGCGTGGTTAATGTCTTC
pL_5	PPR3.0	U	G	GAAGACATTGACATACAACACCCTGATCGACGGCCTGTGCAAGGCCGGCAGACTGGATGAGGCCGAGGAGCTGCTGGAGGAGATGGAGGAGAAGGGCATCAAGCCCGACGTGGTCACATACACCACCCTGATCGACGGCCTGTGCAAGGCCGGCAAGGTGGATGAGGCCCTGGAGCTGTTCGACGAGATGAAGGAGAGGGGCATCAAGCCCGACGTGGTTAATGTCTTC
pL_5	PPR3.0	U	U	GAAGACATTGACATACAACACCCTGATCGACGGCCTGTGCAAGGCCGGCAGACTGGATGAGGCCGAGGAGCTGCTGGAGGAGATGGAGGAGAAGGGCATCAAGCCCGACGTGGTCACATACAACACCCTGATCGACGGCCTGTGCAAGGCCGGCAGACTGGATGAGGCCGAGGAGCTGCTGGAGGAGATGGAGGAGAAGGGCATCAAGCCCGACGTGGTTAATGTCTTC
pL_6	PPR3.0	A	A	GAAGACATGTTACATACACCACACTGATCGACGGACTGTGTAAAGCCGGCAAGGTGGACGAAGCCCTCGAGCTGTTCAAAGAGATGCGGAGCAAGGGCGTGAAGCCCAACGTGGTCACATACACCACACTGATCGACGGACTGTGTAAAGCCGGCAAGGTGGACGAAGCCCTCGAGCTGTTCAAAGAGATGCGGAGCAAGGGCGTGAAGCCCAACGTGGTCATGTCTTC
pL_6	PPR3.0	A	C	GAAGACATGTTACATACACCACACTGATCGACGGACTGTGTAAAGCCGGCAAGGTGGACGAAGCCCTCGAGCTGTTCAAAGAGATGCGGAGCAAGGGCGTGAAGCCCAACGTGGTCACATACAACACCCTGATCGACGGCCTGTGCAAGAGCGGCAAGATCGAGGAGGCCCTGAAGCTGTTCAAGGAGATGGAGGAGAAGGGCATCACCCCCAGCGTGGTCATGTCTTC
pL_6	PPR3.0	A	G	GAAGACATGTTACATACACCACACTGATCGACGGACTGTGTAAAGCCGGCAAGGTGGACGAAGCCCTCGAGCTGTTCAAAGAGATGCGGAGCAAGGGCGTGAAGCCCAACGTGGTCACATACACCACCCTGATCGACGGCCTGTGCAAGGCCGGCAAGGTGGATGAGGCCCTGGAGCTGTTCGACGAGATGAAGGAGAGGGGCATCAAGCCCGACGTGGTCATGTCTTC
pL_6	PPR3.0	A	U	GAAGACATGTTACATACACCACACTGATCGACGGACTGTGTAAAGCCGGCAAGGTGGACGAAGCCCTCGAGCTGTTCAAAGAGATGCGGAGCAAGGGCGTGAAGCCCAACGTGGTCACATACAACACCCTGATCGACGGCCTGTGCAAGGCCGGCAGACTGGATGAGGCCGAGGAGCTGCTGGAGGAGATGGAGGAGAAGGGCATCAAGCCCGACGTGGTCATGTCTTC
pL_6	PPR3.0	C	A	GAAGACATGTTACATACAACACCCTGATCGACGGCCTGTGCAAGAGCGGCAAGATCGAGGAGGCCCTGAAGCTGTTCAAGGAGATGGAGGAGAAGGGCATCACCCCCAGCGTGGTCACATACACCACACTGATCGACGGACTGTGTAAAGCCGGCAAGGTGGACGAAGCCCTCGAGCTGTTCAAAGAGATGCGGAGCAAGGGCGTGAAGCCCAACGTGGTCATGTCTTC
pL_6	PPR3.0	C	C	GAAGACATGTTACATACAACACCCTGATCGACGGCCTGTGCAAGAGCGGCAAGATCGAGGAGGCCCTGAAGCTGTTCAAGGAGATGGAGGAGAAGGGCATCACCCCCAGCGTGGTCACATACAACACCCTGATCGACGGCCTGTGCAAGAGCGGCAAGATCGAGGAGGCCCTGAAGCTGTTCAAGGAGATGGAGGAGAAGGGCATCACCCCCAGCGTGGTCATGTCTTC
pL_6	PPR3.0	C	G	GAAGACATGTTACATACAACACCCTGATCGACGGCCTGTGCAAGAGCGGCAAGATCGAGGAGGCCCTGAAGCTGTTCAAGGAGATGGAGGAGAAGGGCATCACCCCCAGCGTGGTCACATACACCACCCTGATCGACGGCCTGTGCAAGGCCGGCAAGGTGGATGAGGCCCTGGAGCTGTTCGACGAGATGAAGGAGAGGGGCATCAAGCCCGACGTGGTCATGTCTTC
pL_6	PPR3.0	C	U	GAAGACATGTTACATACAACACCCTGATCGACGGCCTGTGCAAGAGCGGCAAGATCGAGGAGGCCCTGAAGCTGTTCAAGGAGATGGAGGAGAAGGGCATCACCCCCAGCGTGGTCACATACAACACCCTGATCGACGGCCTGTGCAAGGCCGGCAGACTGGATGAGGCCGAGGAGCTGCTGGAGGAGATGGAGGAGAAGGGCATCAAGCCCGACGTGGTCATGTCTTC
pL_6	PPR3.0	G	A	GAAGACATGTTACATACACCACCCTGATCGACGGCCTGTGCAAGGCCGGCAAAGTGGACGAGGCCCTGGAGCTGTTCGACGAGATGAAGGAGAGGGGCATCAAGCCCGACGTGGTCACATACACCACACTGATCGACGGACTGTGTAAAGCCGGCAAGGTGGACGAAGCCCTCGAGCTGTTCAAAGAGATGCGGAGCAAGGGCGTGAAGCCCAACGTGGTCATGTCTTC
pL_6	PPR3.0	G	C	GAAGACATGTTACATACACCACCCTGATCGACGGCCTGTGCAAGGCCGGCAAAGTGGACGAGGCCCTGGAGCTGTTCGACGAGATGAAGGAGAGGGGCATCAAGCCCGACGTGGTCACATACAACACCCTGATCGACGGCCTGTGCAAGAGCGGCAAGATCGAGGAGGCCCTGAAGCTGTTCAAGGAGATGGAGGAGAAGGGCATCACCCCCAGCGTGGTCATGTCTTC
pL_6	PPR3.0	G	G	GAAGACATGTTACATACACCACCCTGATCGACGGCCTGTGCAAGGCCGGCAAAGTGGACGAGGCCCTGGAGCTGTTCGACGAGATGAAGGAGAGGGGCATCAAGCCCGACGTGGTCACATACACCACCCTGATCGACGGCCTGTGCAAGGCCGGCAAGGTGGATGAGGCCCTGGAGCTGTTCGACGAGATGAAGGAGAGGGGCATCAAGCCCGACGTGGTCATGTCTTC
pL_6	PPR3.0	G	U	GAAGACATGTTACATACACCACCCTGATCGACGGCCTGTGCAAGGCCGGCAAAGTGGACGAGGCCCTGGAGCTGTTCGACGAGATGAAGGAGAGGGGCATCAAGCCCGACGTGGTCACATACAACACCCTGATCGACGGCCTGTGCAAGGCCGGCAGACTGGATGAGGCCGAGGAGCTGCTGGAGGAGATGGAGGAGAAGGGCATCAAGCCCGACGTGGTCATGTCTTC
pL_6	PPR3.0	U	A	GAAGACATGTTACATACAACACCCTGATCGACGGCCTGTGCAAGGCCGGCAGACTGGATGAGGCCGAGGAGCTGCTGGAGGAGATGGAGGAGAAGGGCATCAAGCCCGACGTGGTCACATACACCACACTGATCGACGGACTGTGTAAAGCCGGCAAGGTGGACGAAGCCCTCGAGCTGTTCAAAGAGATGCGGAGCAAGGGCGTGAAGCCCAACGTGGTCATGTCTTC
pL_6	PPR3.0	U	C	GAAGACATGTTACATACAACACCCTGATCGACGGCCTGTGCAAGGCCGGCAGACTGGATGAGGCCGAGGAGCTGCTGGAGGAGATGGAGGAGAAGGGCATCAAGCCCGACGTGGTCACATACAACACCCTGATCGACGGCCTGTGCAAGAGCGGCAAGATCGAGGAGGCCCTGAAGCTGTTCAAGGAGATGGAGGAGAAGGGCATCACCCCCAGCGTGGTCATGTCTTC
pL_6	PPR3.0	U	G	GAAGACATGTTACATACAACACCCTGATCGACGGCCTGTGCAAGGCCGGCAGACTGGATGAGGCCGAGGAGCTGCTGGAGGAGATGGAGGAGAAGGGCATCAAGCCCGACGTGGTCACATACACCACCCTGATCGACGGCCTGTGCAAGGCCGGCAAGGTGGATGAGGCCCTGGAGCTGTTCGACGAGATGAAGGAGAGGGGCATCAAGCCCGACGTGGTCATGTCTTC
pL_6	PPR3.0	U	U	GAAGACATGTTACATACAACACCCTGATCGACGGCCTGTGCAAGGCCGGCAGACTGGATGAGGCCGAGGAGCTGCTGGAGGAGATGGAGGAGAAGGGCATCAAGCCCGACGTGGTCACATACAACACCCTGATCGACGGCCTGTGCAAGGCCGGCAGACTGGATGAGGCCGAGGAGCTGCTGGAGGAGATGGAGGAGAAGGGCATCAAGCCCGACGTGGTCATGTCTTC
pL_7	PPR3.0	A	A	GAAGACATGGTCACATACACCACACTGATCGACGGACTGTGTAAAGCCGGCAAGGTGGACGAAGCCCTCGAGCTGTTCAAAGAGATGCGGAGCAAGGGCGTGAAGCCCAACGTGGTCACATACACCACACTGATCGACGGACTGTGTAAAGCCGGCAAGGTGGACGAAGCCCTCGAGCTGTTCAAAGAGATGCGGAGCAAGGGCGTGAAGCCCAACGTGGTATGTCTTC
pL_7	PPR3.0	A	C	GAAGACATGGTCACATACACCACACTGATCGACGGACTGTGTAAAGCCGGCAAGGTGGACGAAGCCCTCGAGCTGTTCAAAGAGATGCGGAGCAAGGGCGTGAAGCCCAACGTGGTCACATACAACACCCTGATCGACGGCCTGTGCAAGAGCGGCAAGATCGAGGAGGCCCTGAAGCTGTTCAAGGAGATGGAGGAGAAGGGCATCACCCCCAGCGTGGTATGTCTTC
pL_7	PPR3.0	A	G	GAAGACATGGTCACATACACCACACTGATCGACGGACTGTGTAAAGCCGGCAAGGTGGACGAAGCCCTCGAGCTGTTCAAAGAGATGCGGAGCAAGGGCGTGAAGCCCAACGTGGTCACATACACCACCCTGATCGACGGCCTGTGCAAGGCCGGCAAGGTGGATGAGGCCCTGGAGCTGTTCGACGAGATGAAGGAGAGGGGCATCAAGCCCGACGTGGTATGTCTTC
pL_7	PPR3.0	A	U	GAAGACATGGTCACATACACCACACTGATCGACGGACTGTGTAAAGCCGGCAAGGTGGACGAAGCCCTCGAGCTGTTCAAAGAGATGCGGAGCAAGGGCGTGAAGCCCAACGTGGTCACATACAACACCCTGATCGACGGCCTGTGCAAGGCCGGCAGACTGGATGAGGCCGAGGAGCTGCTGGAGGAGATGGAGGAGAAGGGCATCAAGCCCGACGTGGTATGTCTTC
pL_7	PPR3.0	C	A	GAAGACATGGTCACATACAACACCCTGATCGACGGCCTGTGCAAGAGCGGCAAGATCGAGGAGGCCCTGAAGCTGTTCAAGGAGATGGAGGAGAAGGGCATCACCCCCAGCGTGGTCACATACACCACACTGATCGACGGACTGTGTAAAGCCGGCAAGGTGGACGAAGCCCTCGAGCTGTTCAAAGAGATGCGGAGCAAGGGCGTGAAGCCCAACGTGGTATGTCTTC
pL_7	PPR3.0	C	C	GAAGACATGGTCACATACAACACCCTGATCGACGGCCTGTGCAAGAGCGGCAAGATCGAGGAGGCCCTGAAGCTGTTCAAGGAGATGGAGGAGAAGGGCATCACCCCCAGCGTGGTCACATACAACACCCTGATCGACGGCCTGTGCAAGAGCGGCAAGATCGAGGAGGCCCTGAAGCTGTTCAAGGAGATGGAGGAGAAGGGCATCACCCCCAGCGTGGTATGTCTTC
pL_7	PPR3.0	C	G	GAAGACATGGTCACATACAACACCCTGATCGACGGCCTGTGCAAGAGCGGCAAGATCGAGGAGGCCCTGAAGCTGTTCAAGGAGATGGAGGAGAAGGGCATCACCCCCAGCGTGGTCACATACACCACCCTGATCGACGGCCTGTGCAAGGCCGGCAAGGTGGATGAGGCCCTGGAGCTGTTCGACGAGATGAAGGAGAGGGGCATCAAGCCCGACGTGGTATGTCTTC
pL_7	PPR3.0	C	U	GAAGACATGGTCACATACAACACCCTGATCGACGGCCTGTGCAAGAGCGGCAAGATCGAGGAGGCCCTGAAGCTGTTCAAGGAGATGGAGGAGAAGGGCATCACCCCCAGCGTGGTCACATACAACACCCTGATCGACGGCCTGTGCAAGGCCGGCAGACTGGATGAGGCCGAGGAGCTGCTGGAGGAGATGGAGGAGAAGGGCATCAAGCCCGACGTGGTATGTCTTC
pL_7	PPR3.0	G	A	GAAGACATGGTCACATACACCACCCTGATCGACGGCCTGTGCAAGGCCGGCAAAGTGGACGAGGCCCTGGAGCTGTTCGACGAGATGAAGGAGAGGGGCATCAAGCCCGACGTGGTCACATACACCACACTGATCGACGGACTGTGTAAAGCCGGCAAGGTGGACGAAGCCCTCGAGCTGTTCAAAGAGATGCGGAGCAAGGGCGTGAAGCCCAACGTGGTATGTCTTC
pL_7	PPR3.0	G	C	GAAGACATGGTCACATACACCACCCTGATCGACGGCCTGTGCAAGGCCGGCAAAGTGGACGAGGCCCTGGAGCTGTTCGACGAGATGAAGGAGAGGGGCATCAAGCCCGACGTGGTCACATACAACACCCTGATCGACGGCCTGTGCAAGAGCGGCAAGATCGAGGAGGCCCTGAAGCTGTTCAAGGAGATGGAGGAGAAGGGCATCACCCCCAGCGTGGTATGTCTTC
pL_7	PPR3.0	G	G	GAAGACATGGTCACATACACCACCCTGATCGACGGCCTGTGCAAGGCCGGCAAAGTGGACGAGGCCCTGGAGCTGTTCGACGAGATGAAGGAGAGGGGCATCAAGCCCGACGTGGTCACATACACCACCCTGATCGACGGCCTGTGCAAGGCCGGCAAGGTGGATGAGGCCCTGGAGCTGTTCGACGAGATGAAGGAGAGGGGCATCAAGCCCGACGTGGTATGTCTTC
pL_7	PPR3.0	G	U	GAAGACATGGTCACATACACCACCCTGATCGACGGCCTGTGCAAGGCCGGCAAAGTGGACGAGGCCCTGGAGCTGTTCGACGAGATGAAGGAGAGGGGCATCAAGCCCGACGTGGTCACATACAACACCCTGATCGACGGCCTGTGCAAGGCCGGCAGACTGGATGAGGCCGAGGAGCTGCTGGAGGAGATGGAGGAGAAGGGCATCAAGCCCGACGTGGTATGTCTTC
pL_7	PPR3.0	U	A	GAAGACATGGTCACATACAACACCCTGATCGACGGCCTGTGCAAGGCCGGCAGACTGGATGAGGCCGAGGAGCTGCTGGAGGAGATGGAGGAGAAGGGCATCAAGCCCGACGTGGTCACATACACCACACTGATCGACGGACTGTGTAAAGCCGGCAAGGTGGACGAAGCCCTCGAGCTGTTCAAAGAGATGCGGAGCAAGGGCGTGAAGCCCAACGTGGTATGTCTTC
pL_7	PPR3.0	U	C	GAAGACATGGTCACATACAACACCCTGATCGACGGCCTGTGCAAGGCCGGCAGACTGGATGAGGCCGAGGAGCTGCTGGAGGAGATGGAGGAGAAGGGCATCAAGCCCGACGTGGTCACATACAACACCCTGATCGACGGCCTGTGCAAGAGCGGCAAGATCGAGGAGGCCCTGAAGCTGTTCAAGGAGATGGAGGAGAAGGGCATCACCCCCAGCGTGGTATGTCTTC
pL_7	PPR3.0	U	G	GAAGACATGGTCACATACAACACCCTGATCGACGGCCTGTGCAAGGCCGGCAGACTGGATGAGGCCGAGGAGCTGCTGGAGGAGATGGAGGAGAAGGGCATCAAGCCCGACGTGGTCACATACACCACCCTGATCGACGGCCTGTGCAAGGCCGGCAAGGTGGATGAGGCCCTGGAGCTGTTCGACGAGATGAAGGAGAGGGGCATCAAGCCCGACGTGGTATGTCTTC
pL_7	PPR3.0	U	U	GAAGACATGGTCACATACAACACCCTGATCGACGGCCTGTGCAAGGCCGGCAGACTGGATGAGGCCGAGGAGCTGCTGGAGGAGATGGAGGAGAAGGGCATCAAGCCCGACGTGGTCACATACAACACCCTGATCGACGGCCTGTGCAAGGCCGGCAGACTGGATGAGGCCGAGGAGCTGCTGGAGGAGATGGAGGAGAAGGGCATCAAGCCCGACGTGGTATGTCTTC
pL_8	PPR3.0	A	A	GAAGACATTGGTTACATACACCACACTGATCGACGGACTGTGTAAAGCCGGCAAGGTGGACGAAGCCCTCGAGCTGTTCAAAGAGATGCGGAGCAAGGGCGTGAAGCCCAACGTGGTCACATACACCACACTGATCGACGGACTGTGTAAAGCCGGCAAGGTGGACGAAGCCCTCGAGCTGTTCAAAGAGATGCGGAGCAAGGGCGTGAAGCCCAACGTGGATGTCTTC
pL_8	PPR3.0	A	C	GAAGACATTGGTTACATACACCACACTGATCGACGGACTGTGTAAAGCCGGCAAGGTGGACGAAGCCCTCGAGCTGTTCAAAGAGATGCGGAGCAAGGGCGTGAAGCCCAACGTGGTCACATACAACACCCTGATCGACGGCCTGTGCAAGAGCGGCAAGATCGAGGAGGCCCTGAAGCTGTTCAAGGAGATGGAGGAGAAGGGCATCACCCCCAGCGTGGATGTCTTC
pL_8	PPR3.0	A	G	GAAGACATTGGTTACATACACCACACTGATCGACGGACTGTGTAAAGCCGGCAAGGTGGACGAAGCCCTCGAGCTGTTCAAAGAGATGCGGAGCAAGGGCGTGAAGCCCAACGTGGTCACATACACCACCCTGATCGACGGCCTGTGCAAGGCCGGCAAGGTGGATGAGGCCCTGGAGCTGTTCGACGAGATGAAGGAGAGGGGCATCAAGCCCGACGTGGATGTCTTC
pL_8	PPR3.0	A	U	GAAGACATTGGTTACATACACCACACTGATCGACGGACTGTGTAAAGCCGGCAAGGTGGACGAAGCCCTCGAGCTGTTCAAAGAGATGCGGAGCAAGGGCGTGAAGCCCAACGTGGTCACATACAACACCCTGATCGACGGCCTGTGCAAGGCCGGCAGACTGGATGAGGCCGAGGAGCTGCTGGAGGAGATGGAGGAGAAGGGCATCAAGCCCGACGTGGATGTCTTC
pL_8	PPR3.0	C	A	GAAGACATTGGTTACATACAACACCCTGATCGACGGCCTGTGCAAGAGCGGCAAGATCGAGGAGGCCCTGAAGCTGTTCAAGGAGATGGAGGAGAAGGGCATCACCCCCAGCGTGGTCACATACACCACACTGATCGACGGACTGTGTAAAGCCGGCAAGGTGGACGAAGCCCTCGAGCTGTTCAAAGAGATGCGGAGCAAGGGCGTGAAGCCCAACGTGGATGTCTTC
pL_8	PPR3.0	C	C	GAAGACATTGGTTACATACAACACCCTGATCGACGGCCTGTGCAAGAGCGGCAAGATCGAGGAGGCCCTGAAGCTGTTCAAGGAGATGGAGGAGAAGGGCATCACCCCCAGCGTGGTCACATACAACACCCTGATCGACGGCCTGTGCAAGAGCGGCAAGATCGAGGAGGCCCTGAAGCTGTTCAAGGAGATGGAGGAGAAGGGCATCACCCCCAGCGTGGATGTCTTC
pL_8	PPR3.0	C	G	GAAGACATTGGTTACATACAACACCCTGATCGACGGCCTGTGCAAGAGCGGCAAGATCGAGGAGGCCCTGAAGCTGTTCAAGGAGATGGAGGAGAAGGGCATCACCCCCAGCGTGGTCACATACACCACCCTGATCGACGGCCTGTGCAAGGCCGGCAAGGTGGATGAGGCCCTGGAGCTGTTCGACGAGATGAAGGAGAGGGGCATCAAGCCCGACGTGGATGTCTTC
pL_8	PPR3.0	C	U	GAAGACATTGGTTACATACAACACCCTGATCGACGGCCTGTGCAAGAGCGGCAAGATCGAGGAGGCCCTGAAGCTGTTCAAGGAGATGGAGGAGAAGGGCATCACCCCCAGCGTGGTCACATACAACACCCTGATCGACGGCCTGTGCAAGGCCGGCAGACTGGATGAGGCCGAGGAGCTGCTGGAGGAGATGGAGGAGAAGGGCATCAAGCCCGACGTGGATGTCTTC
pL_8	PPR3.0	G	A	GAAGACATTGGTTACATACACCACCCTGATCGACGGCCTGTGCAAGGCCGGCAAAGTGGACGAGGCCCTGGAGCTGTTCGACGAGATGAAGGAGAGGGGCATCAAGCCCGACGTGGTCACATACACCACACTGATCGACGGACTGTGTAAAGCCGGCAAGGTGGACGAAGCCCTCGAGCTGTTCAAAGAGATGCGGAGCAAGGGCGTGAAGCCCAACGTGGATGTCTTC
pL_8	PPR3.0	G	C	GAAGACATTGGTTACATACACCACCCTGATCGACGGCCTGTGCAAGGCCGGCAAAGTGGACGAGGCCCTGGAGCTGTTCGACGAGATGAAGGAGAGGGGCATCAAGCCCGACGTGGTCACATACAACACCCTGATCGACGGCCTGTGCAAGAGCGGCAAGATCGAGGAGGCCCTGAAGCTGTTCAAGGAGATGGAGGAGAAGGGCATCACCCCCAGCGTGGATGTCTTC
pL_8	PPR3.0	G	G	GAAGACATTGGTTACATACACCACCCTGATCGACGGCCTGTGCAAGGCCGGCAAAGTGGACGAGGCCCTGGAGCTGTTCGACGAGATGAAGGAGAGGGGCATCAAGCCCGACGTGGTCACATACACCACCCTGATCGACGGCCTGTGCAAGGCCGGCAAGGTGGATGAGGCCCTGGAGCTGTTCGACGAGATGAAGGAGAGGGGCATCAAGCCCGACGTGGATGTCTTC
pL_8	PPR3.0	G	U	GAAGACATTGGTTACATACACCACCCTGATCGACGGCCTGTGCAAGGCCGGCAAAGTGGACGAGGCCCTGGAGCTGTTCGACGAGATGAAGGAGAGGGGCATCAAGCCCGACGTGGTCACATACAACACCCTGATCGACGGCCTGTGCAAGGCCGGCAGACTGGATGAGGCCGAGGAGCTGCTGGAGGAGATGGAGGAGAAGGGCATCAAGCCCGACGTGGATGTCTTC
pL_8	PPR3.0	U	A	GAAGACATTGGTTACATACAACACCCTGATCGACGGCCTGTGCAAGGCCGGCAGACTGGATGAGGCCGAGGAGCTGCTGGAGGAGATGGAGGAGAAGGGCATCAAGCCCGACGTGGTCACATACACCACACTGATCGACGGACTGTGTAAAGCCGGCAAGGTGGACGAAGCCCTCGAGCTGTTCAAAGAGATGCGGAGCAAGGGCGTGAAGCCCAACGTGGATGTCTTC
pL_8	PPR3.0	U	C	GAAGACATTGGTTACATACAACACCCTGATCGACGGCCTGTGCAAGGCCGGCAGACTGGATGAGGCCGAGGAGCTGCTGGAGGAGATGGAGGAGAAGGGCATCAAGCCCGACGTGGTCACATACAACACCCTGATCGACGGCCTGTGCAAGAGCGGCAAGATCGAGGAGGCCCTGAAGCTGTTCAAGGAGATGGAGGAGAAGGGCATCACCCCCAGCGTGGATGTCTTC
pL_8	PPR3.0	U	G	GAAGACATTGGTTACATACAACACCCTGATCGACGGCCTGTGCAAGGCCGGCAGACTGGATGAGGCCGAGGAGCTGCTGGAGGAGATGGAGGAGAAGGGCATCAAGCCCGACGTGGTCACATACACCACCCTGATCGACGGCCTGTGCAAGGCCGGCAAGGTGGATGAGGCCCTGGAGCTGTTCGACGAGATGAAGGAGAGGGGCATCAAGCCCGACGTGGATGTCTTC
pL_8	PPR3.0	U	U	GAAGACATTGGTTACATACAACACCCTGATCGACGGCCTGTGCAAGGCCGGCAGACTGGATGAGGCCGAGGAGCTGCTGGAGGAGATGGAGGAGAAGGGCATCAAGCCCGACGTGGTCACATACAACACCCTGATCGACGGCCTGTGCAAGGCCGGCAGACTGGATGAGGCCGAGGAGCTGCTGGAGGAGATGGAGGAGAAGGGCATCAAGCCCGACGTGGATGTCTTC
pL_9	PPR3.0	A	A	GAAGACATGTGGTGACATACACAACACTGATCGACGGCCTCTGCAAGGCCGGCAAGGTGGATGAAGCTCTGGAGCTGTTTAAGGAGATGAGATCCAAGGGCGTGAAGCCCAACGTGGTGACCTACACCACACTGATTGACGGACTGTGCAAAGCCGGCAAAGTGGACGAGGCTCTGGAGCTCTTCAAGGAAATGAGGAGCAAGGGCGTCAAGCCCAACGAGCTGACGATGTCTTC
pL_9	PPR3.0	A	C	GAAGACATGTGGTGACATACACAACACTGATCGACGGACTGTGCAAGGCCGGCAAGGTGGATGAGGCTCTGGAACTGTTCAAGGAGATGAGGAGCAAGGGCGTGAAGCCCAACGTGGTGACCTACAACACACTGATCGATGGACTGTGTAAGTCCGGCAAGATCGAGGAGGCTCTGAAGCTGTTTAAGGAGATGGAGGAGAAGGGCATCACCCCTTCCGAGCTGACGATGTCTTC
pL_9	PPR3.0	A	G	GAAGACATGTGGTGACATACACAACACTGATCGACGGACTGTGTAAGGCCGGCAAGGTGGACGAAGCTCTGGAGCTGTTCAAGGAGATGAGAAGCAAGGGCGTGAAGCCCAACGTGGTGACCTACACCACACTGATTGACGGCCTCTGCAAGGCCGGAAAGGTGGATGAGGCTCTGGAACTGTTCGACGAGATGAAGGAGAGGGGCATCAAGCCCGACGAGCTGACGATGTCTTC
pL_9	PPR3.0	A	U	GAAGACATGTGGTGACATACACAACACTGATCGACGGACTGTGCAAGGCCGGCAAGGTGGATGAGGCTCTGGAGCTGTTCAAGGAGATGAGGAGCAAGGGCGTGAAGCCCAACGTGGTGACCTACAACACACTGATCGATGGACTGTGTAAGGCTGGCAGACTGGACGAGGCCGAGGAGCTGCTGGAGGAGATGGAGGAGAAGGGCATCAAGCCCGACGAGCTGACGATGTCTTC
pL_9	PPR3.0	C	A	GAAGACATGTGGTGACATACAATACACTGATCGACGGACTGTGCAAGAGCGGCAAGATCGAGGAGGCTCTGAAACTGTTCAAGGAGATGGAGGAGAAGGGCATCACCCCCAGCGTGGTGACCTACACCACCCTCATCGATGGACTGTGTAAGGCCGGCAAGGTGGACGAAGCTCTGGAGCTGTTTAAGGAGATGAGGTCCAAGGGCGTGAAGCCCAACGAGCTGACGATGTCTTC
pL_9	PPR3.0	C	C	GAAGACATGTGGTGACATACAATACACTGATCGACGGCCTCTGCAAGTCCGGCAAGATTGAGGAAGCTCTGAAGCTGTTTAAAGAGATGGAGGAGAAGGGAATCACCCCCAGCGTGGTGACCTACAACACACTGATCGACGGACTGTGCAAGAGCGGAAAGATCGAAGAGGCCCTCAAGCTCTTCAAGGAGATGGAAGAGAAAGGCATCACACCCAGCGAGCTGACGATGTCTTC
pL_9	PPR3.0	C	G	GAAGACATGTGGTGACATACAATACACTGATCGACGGACTGTGCAAGAGCGGCAAGATCGAGGAGGCTCTGAAGCTGTTCAAGGAGATGGAGGAGAAGGGCATCACCCCCAGCGTGGTGACCTACACCACACTGATCGATGGACTGTGTAAGGCCGGCAAGGTGGATGAGGCTCTGGAGCTGTTCGACGAGATGAAGGAGAGGGGCATCAAGCCCGACGAGCTGACGATGTCTTC
pL_9	PPR3.0	C	U	GAAGACATGTGGTGACATACAACACCCTCATCGACGGACTGTGCAAGAGCGGCAAGATCGAGGAGGCTCTGAAGCTGTTCAAAGAGATGGAGGAGAAGGGCATCACCCCCAGCGTGGTGACCTACAACACACTGATCGACGGACTGTGCAAGGCCGGCAGACTGGACGAAGCCGAGGAGCTGCTGGAGGAGATGGAGGAAAAGGGCATCAAGCCCGACGAGCTGACGATGTCTTC
pL_9	PPR3.0	G	A	GAAGACATGTGGTGACATACACAACACTGATCGACGGCCTCTGCAAGGCCGGCAAAGTGGATGAGGCCCTCGAGCTGTTCGACGAGATGAAGGAGAGAGGCATCAAGCCCGACGTGGTGACCTACACCACACTGATCGACGGACTGTGCAAAGCCGGAAAGGTGGATGAGGCTCTGGAGCTCTTCAAGGAGATGAGGAGCAAGGGCGTGAAACCCAACGAGCTGACGATGTCTTC
pL_9	PPR3.0	G	C	GAAGACATGTGGTGACATACACAACACTGATCGACGGACTGTGCAAGGCTGGCAAGGTGGACGAGGCTCTGGAGCTGTTCGACGAGATGAAGGAGAGAGGCATCAAGCCCGACGTGGTGACCTACAACACACTGATCGATGGACTGTGTAAGAGCGGCAAGATCGAGGAGGCTCTGAAGCTGTTCAAGGAGATGGAGGAGAAGGGCATCACCCCTAGCGAGCTGACGATGTCTTC
pL_9	PPR3.0	G	G	GAAGACATGTGGTGACATACACAACACTGATCGACGGACTCTGTAAGGCCGGCAAGGTGGATGAGGCCCTCGAGCTGTTCGACGAAATGAAGGAGAGAGGAATCAAGCCCGACGTGGTGACCTACACCACCCTCATCGACGGACTGTGCAAGGCCGGCAAAGTGGATGAGGCTCTGGAGCTGTTCGATGAGATGAAAGAGAGGGGCATCAAACCCGACGAGCTGACGATGTCTTC
pL_9	PPR3.0	G	U	GAAGACATGTGGTGACATACACAACACTGATCGACGGACTGTGTAAGGCCGGCAAGGTGGATGAGGCTCTGGAGCTGTTCGACGAGATGAAGGAGAGAGGCATCAAGCCCGACGTGGTGACCTACAACACACTGATTGACGGACTGTGCAAGGCCGGCAGACTGGACGAGGCCGAAGAGCTGCTGGAGGAGATGGAGGAGAAGGGCATTAAGCCCGACGAGCTGACGATGTCTTC
pL_9	PPR3.0	U	A	GAAGACATGTGGTGACATACAATACACTGATCGACGGCCTCTGCAAGGCCGGCAGACTGGATGAGGCCGAGGAGCTGCTGGAGGAGATGGAGGAGAAGGGCATCAAGCCCGACGTGGTGACCTACACCACACTGATTGACGGACTGTGCAAAGCCGGCAAGGTGGATGAGGCTCTGGAGCTGTTCAAGGAGATGAGAAGCAAGGGCGTGAAGCCCAACGAGCTGACGATGTCTTC
pL_9	PPR3.0	U	C	GAAGACATGTGGTGACATACAATACACTGATCGACGGACTGTGTAAGGCCGGCAGACTGGATGAGGCCGAGGAGCTGCTGGAAGAGATGGAGGAGAAGGGCATCAAGCCCGACGTGGTGACCTACAACACACTGATTGACGGACTGTGCAAGAGCGGCAAGATCGAGGAGGCTCTGAAGCTGTTCAAGGAGATGGAGGAAAAGGGCATCACCCCCTCCGAGCTGACGATGTCTTC
pL_9	PPR3.0	U	G	GAAGACATGTGGTGACATACAATACACTGATCGACGGCCTCTGCAAGGCCGGCAGACTGGATGAGGCCGAGGAGCTGCTGGAGGAGATGGAGGAGAAAGGCATCAAGCCCGACGTGGTGACCTACACCACACTGATTGACGGACTGTGCAAAGCCGGCAAGGTGGACGAGGCTCTGGAGCTGTTCGACGAGATGAAGGAGAGGGGCATTAAGCCCGACGAGCTGACGATGTCTTC
pL_9	PPR3.0	U	U	GAAGACATGTGGTGACATACAATACACTGATCGACGGACTGTGTAAGGCCGGCAGACTGGATGAGGCCGAAGAACTGCTGGAGGAGATGGAGGAAAAGGGCATCAAACCCGACGTGGTGACCTACAACACACTGATTGACGGCCTCTGCAAGGCCGGCAGACTGGACGAGGCTGAGGAGCTGCTGGAAGAGATGGAAGAGAAGGGAATCAAGCCCGACGAGCTGACGATGTCTTC
