# Supplementary material for: Construction of a Versatile, Programmable RNA-Binding Protein Using Designer PPR Proteins and Its Application for Splicing Control in Mammalian Cells
Source: Cells. 2022 Nov 8;11(22):3529. doi: 10.3390/cells11223529 (PMC9688318; doi:10.3390/cells11223529)
Supplement: Supplementary file 1 [file cells-11-03529-s001.zip › Table_S2_YY_etal.xlsx]

## Sheet: Sheet1
Table S2 Binding performance of PPR2.0. The RNA secondary structure (DG) was analzyed using RNAfold. The binding affinities by RBP-ELISA and EMSA were shown. Target sequence for designer PPR protein is underlined.
PPR name	RBP-ELISA	Kd(M)	DG	Probe sequence
PPR2.0t1	66377350	3.446e-09	-3.1	GACAUGCGAAUGAACUCUUCCGGGAGACUG
PPR2.0t2	56756700	4e-09	-2.9	GACAUGCGAGAGGAAGCCUGAGAGUGACUG
PPR2.0t3	33482980	5.919e-08	-3.84	GACAUGCCUGAGUCAUAACCAGCCUGACUG
PPR2.0t4	59832120	2.56651e-09	-2.02	GACAUGCGGCAAAAAGAUCACUGUAGACUG
PPR2.0t5	16654520	1.67e-07	-6.36	GACAUGCCAACAUCAGUCUGAUAAGGACUG
PPR2.0t8	46999320	1.947e-09	-1.24	GACAUGCCACUAUUUAAGUUAUCAAGACUG
PPR2.0t11	37809300	6.33e-08	-3.29	GACAUGCGACUCAGGAAUCGGCUCUGACUG
PPR2.0t14	13340770	1.97e-07	-0.14	GACAUGCGCAGAUAAUUAAUAAGAAGACUG
PPR2.0t15	28442270	4.1e-08	-0.34	GACAUGCAAGGAUAAUAUCAAACACGACUG
PPR2.0t19	11932270	1.73e-07	-3.4	GACAUGCGUGAUGUGGAGUUAAGGCGACUG
PPR2.0t23	32739960	1.037e-08	-1.68	GACAUGCCCCAUAGAUGUGACAAGCGACUG
