# Supplementary material for: Construction of a Versatile, Programmable RNA-Binding Protein Using Designer PPR Proteins and Its Application for Splicing Control in Mammalian Cells
Source: Cells. 2022 Nov 8;11(22):3529. doi: 10.3390/cells11223529 (PMC9688318; doi:10.3390/cells11223529)
Supplement: Supplementary file 1 [file cells-11-03529-s001.zip › Table_S3_YY_eta.xlsx]

## Sheet: vx_PPRx
Table S3. designer PPR proteins used in this study
version	Target name	Target sequence	PPR protein sequence	PPR protein sequence (Nucleotide)
SCD	t1	GAAUGAACUCUUCCGGGA	MGNSVVTYTTLIDGLCKAGKLDEALKLFEEMVEKGIKPDVVTYTTLIDGLCKAGKLDEALKLFEEMVEKGIKPNVVTYTTLIDGLCKAGKLDEALKLFEEMVEKGIKPNVVTYNTLIDGLCKAGKLDEALKLFEEMVEKGIKPDVVTYTTLIDGLCKAGKLDEALKLFEEMVEKGIKPDVVTYTTLIDGLCKAGKLDEALKLFEEMVEKGIKPNVVTYTTLIDGLCKAGKLDEALKLFEEMVEKGIKPNVVTYNTLIDGLCKAGKLDEALKLFEEMVEKGIKPSVVTYNTLIDGLCKAGKLDEALKLFEEMVEKGIKPDVVTYNTLIDGLCKAGKLDEALKLFEEMVEKGIKPSVVTYNTLIDGLCKAGKLDEALKLFEEMVEKGIKPDVVTYNTLIDG…	ATGGGAAACTCCGTGGTCACATACACCACGCTGATCGATGGTCTGTGTAAGGCCGGTAAATTAGATGAAGCGCTGAAGTTATTCGAAGAGATGGTTGAAAAAGGTATCAAGCCGGATGTGGTCACATACACCACGCTGATCGATGGTCTGTGTAAGGCCGGCAAATTAGATGAGGCCCTGAAGTTATTCGAAGAGATGGTTGAAAAAGGCATCAAGCCGAACGTGGTCACATACACCACGCTGATCGATGGTCTGTGTAAGGCCGGCAAATTAGATGAGGCCCTGAAGTTATTCGAAGAGATGGTTGAAAAAGGCATCAAGCCGAACGTGGTCACATACAATACGCTGATTGATGGCTTATGTAAAGCGGGTAAGCTGGATGAGGCCTTAAAACTGTTT…
SCD	t2	GAGAGGAAGCCUGAGAGU	MGNSVVTYTTLIDGLCKAGKLDEALKLFEEMVEKGIKPDVVTYTTLIDGLCKAGKLDEALKLFEEMVEKGIKPNVVTYTTLIDGLCKAGKLDEALKLFEEMVEKGIKPDVVTYTTLIDGLCKAGKLDEALKLFEEMVEKGIKPNVVTYTTLIDGLCKAGKLDEALKLFEEMVEKGIKPDVVTYTTLIDGLCKAGKLDEALKLFEEMVEKGIKPDVVTYTTLIDGLCKAGKLDEALKLFEEMVEKGIKPNVVTYTTLIDGLCKAGKLDEALKLFEEMVEKGIKPNVVTYTTLIDGLCKAGKLDEALKLFEEMVEKGIKPDVVTYNTLIDGLCKAGKLDEALKLFEEMVEKGIKPSVVTYNTLIDGLCKAGKLDEALKLFEEMVEKGIKPSVVTYNTLIDG…	ATGGGAAACTCCGTGGTCACATACACCACGCTGATCGATGGTCTGTGTAAGGCCGGTAAATTAGATGAAGCGCTGAAGTTATTCGAAGAGATGGTTGAAAAAGGTATCAAGCCGGATGTGGTCACATACACCACGCTGATCGATGGTCTGTGTAAGGCCGGCAAATTAGATGAGGCCCTGAAGTTATTCGAAGAGATGGTTGAAAAAGGCATCAAGCCGAACGTGGTCACATACACCACGCTGATCGATGGTCTGTGTAAGGCCGGTAAATTAGATGAAGCGCTGAAGTTATTCGAAGAGATGGTTGAAAAAGGTATCAAGCCGGATGTGGTCACATACACCACGCTGATCGATGGTCTGTGTAAGGCCGGCAAATTAGATGAGGCCCTGAAGTTATTC…
SCD	t3	CUGAGUCAUAACCAGCCU	MGNSVVTYNTLIDGLCKAGKLDEALKLFEEMVEKGIKPSVVTYNTLIDGLCKAGKLDEALKLFEEMVEKGIKPDVVTYTTLIDGLCKAGKLDEALKLFEEMVEKGIKPDVVTYTTLIDGLCKAGKLDEALKLFEEMVEKGIKPNVVTYTTLIDGLCKAGKLDEALKLFEEMVEKGIKPDVVTYNTLIDGLCKAGKLDEALKLFEEMVEKGIKPDVVTYNTLIDGLCKAGKLDEALKLFEEMVEKGIKPSVVTYTTLIDGLCKAGKLDEALKLFEEMVEKGIKPNVVTYNTLIDGLCKAGKLDEALKLFEEMVEKGIKPDVVTYTTLIDGLCKAGKLDEALKLFEEMVEKGIKPNVVTYTTLIDGLCKAGKLDEALKLFEEMVEKGIKPNVVTYNTLIDG…	ATGGGAAACTCCGTGGTCACATACAACACCCTGATTGATGGCTTATGCAAAGCGGGTAAGCTGGATGAAGCGTTAAAACTGTTTGAGGAAATGGTGGAGAAGGGTATTAAACCGAGCGTGGTCACATACAATACGCTGATTGATGGCTTATGTAAAGCGGGTAAGCTGGATGAGGCCTTAAAACTGTTTGAGGAAATGGTGGAGAAGGGCATTAAACCGGACGTGGTCACATACACCACGCTGATCGATGGTCTGTGTAAGGCCGGTAAATTAGATGAAGCGCTGAAGTTATTCGAAGAGATGGTTGAAAAAGGTATCAAGCCGGATGTGGTCACATACACCACGCTGATCGATGGTCTGTGTAAGGCCGGCAAATTAGATGAGGCCCTGAAGTTATTC…
SCD	t4	GGCAAAAAGAUCACUGUA	MGNSVVTYTTLIDGLCKAGKLDEALKLFEEMVEKGIKPDVVTYTTLIDGLCKAGKLDEALKLFEEMVEKGIKPDVVTYNTLIDGLCKAGKLDEALKLFEEMVEKGIKPSVVTYTTLIDGLCKAGKLDEALKLFEEMVEKGIKPNVVTYTTLIDGLCKAGKLDEALKLFEEMVEKGIKPNVVTYTTLIDGLCKAGKLDEALKLFEEMVEKGIKPNVVTYTTLIDGLCKAGKLDEALKLFEEMVEKGIKPNVVTYTTLIDGLCKAGKLDEALKLFEEMVEKGIKPNVVTYTTLIDGLCKAGKLDEALKLFEEMVEKGIKPDVVTYTTLIDGLCKAGKLDEALKLFEEMVEKGIKPNVVTYNTLIDGLCKAGKLDEALKLFEEMVEKGIKPDVVTYNTLIDG…	ATGGGAAACTCCGTGGTCACATACACCACGCTGATCGATGGTCTGTGTAAGGCCGGTAAATTAGATGAAGCGCTGAAGTTATTCGAAGAGATGGTTGAAAAAGGTATCAAGCCGGATGTGGTCACATACACCACGCTGATCGATGGTCTGTGTAAGGCCGGTAAATTAGATGAAGCGCTGAAGTTATTCGAAGAGATGGTTGAAAAAGGTATCAAGCCGGACGTGGTCACATACAACACCCTGATTGATGGCTTATGCAAAGCGGGTAAGCTGGATGAAGCGTTAAAACTGTTTGAGGAAATGGTGGAGAAGGGTATTAAACCGAGCGTGGTCACATACACCACGCTGATCGATGGTCTGTGTAAGGCCGGCAAATTAGATGAGGCCCTGAAGTTATTC…
PPR2.0	t1	GAAUGAACUCUUCCGGGA	MGNSVVTYTTLIDGLCKAGKVDEALELFDEMKERGIKPDVVTYTTLIDGLCKAGDVDEALELFKEMRSKGVKPNVVTYTTLIDGLCKAGDVDEALELFKEMRSKGVKPNVVTYNTLIDGLCKAGRLDEAEELLEEMEEKGIKPDVVTYTTLIDGLCKAGKVDEALELFDEMKERGIKPDVVTYTTLIDGLCKAGDVDEALELFKEMRSKGVKPNVVTYTTLIDGLCKAGDVDEALELFKEMRSKGVKPNVVTYNTLIDGLCKSGKIEEALKLFKEMEEKGITPSVVTYNTLIDGLCKAGRLDEAEELLEEMEEKGIKPDVVTYNTLIDGLCKSGKIEEALKLFKEMEEKGITPSVVTYNTLIDGLCKAGRLDEAEELLEEMEEKGIKPDVVTYNTLIDG…	ATGGGAAACTCCGTGGTCACATACACCACCCTGATCGACGGCCTGTGCAAGGCCGGCAAGGTGGACGAAGCCCTGGAGCTGTTCGACGAGATGAAGGAGAGGGGCATCAAGCCCGACGTGGTCACATACACCACACTGATCGACGGACTGTGTAAAGCCGGCGACGTGGACGAAGCCCTCGAGCTGTTCAAAGAGATGCGGAGCAAGGGCGTGAAGCCCAACGTGGTCACATACACCACACTGATCGACGGACTGTGTAAAGCCGGCGACGTGGACGAAGCCCTCGAGCTGTTCAAAGAGATGCGGAGCAAGGGCGTGAAGCCCAACGTGGTCACATACAACACCCTGATCGACGGCCTGTGCAAGGCCGGCAGACTGGACGAGGCCGAAGAGCTGCTG…
PPR2.0	t2	GAGAGGAAGCCUGAGAGU	MGNSVVTYTTLIDGLCKAGKVDEALELFDEMKERGIKPDVVTYTTLIDGLCKAGDVDEALELFKEMRSKGVKPNVVTYTTLIDGLCKAGKVDEALELFDEMKERGIKPDVVTYTTLIDGLCKAGDVDEALELFKEMRSKGVKPNVVTYTTLIDGLCKAGKVDEALELFDEMKERGIKPDVVTYTTLIDGLCKAGKVDEALELFDEMKERGIKPDVVTYTTLIDGLCKAGDVDEALELFKEMRSKGVKPNVVTYTTLIDGLCKAGDVDEALELFKEMRSKGVKPNVVTYTTLIDGLCKAGKVDEALELFDEMKERGIKPDVVTYNTLIDGLCKSGKIEEALKLFKEMEEKGITPSVVTYNTLIDGLCKSGKIEEALKLFKEMEEKGITPSVVTYNTLIDG…	ATGGGAAACTCCGTGGTCACATACACCACCCTGATCGACGGCCTGTGCAAGGCCGGCAAGGTGGATGAGGCCCTGGAGCTGTTCGACGAGATGAAGGAGAGGGGCATCAAGCCCGACGTGGTCACATACACCACACTGATCGACGGACTGTGTAAAGCCGGCGACGTGGACGAAGCCCTCGAGCTGTTCAAAGAGATGCGGAGCAAGGGCGTGAAGCCCAACGTGGTGACATACACCACCCTGATCGACGGCCTGTGCAAGGCCGGCAAAGTGGACGAGGCCCTGGAGCTGTTCGACGAGATGAAGGAGAGGGGCATCAAGCCCGACGTGGTCACATACACCACACTGATCGACGGACTGTGTAAAGCCGGCGACGTGGACGAAGCCCTCGAGCTGTTC…
PPR2.0	t3	CUGAGUCAUAACCAGCCU	MGNSVVTYNTLIDGLCKSGKIEEALKLFKEMEEKGITPSVVTYNTLIDGLCKAGRLDEAEELLEEMEEKGIKPDVVTYTTLIDGLCKAGKVDEALELFDEMKERGIKPDVVTYTTLIDGLCKAGDVDEALELFKEMRSKGVKPNVVTYTTLIDGLCKAGKVDEALELFDEMKERGIKPDVVTYNTLIDGLCKAGRLDEAEELLEEMEEKGIKPDVVTYNTLIDGLCKSGKIEEALKLFKEMEEKGITPSVVTYTTLIDGLCKAGDVDEALELFKEMRSKGVKPNVVTYNTLIDGLCKAGRLDEAEELLEEMEEKGIKPDVVTYTTLIDGLCKAGDVDEALELFKEMRSKGVKPNVVTYTTLIDGLCKAGDVDEALELFKEMRSKGVKPNVVTYNTLIDG…	ATGGGAAACTCCGTGGTCACATACAACACCCTGATCGACGGCCTGTGCAAGAGCGGCAAGATCGAGGAGGCCCTGAAGCTGTTCAAGGAGATGGAGGAGAAGGGCATCACCCCCAGCGTGGTCACATACAACACCCTGATCGACGGCCTGTGCAAGGCCGGCAGACTGGATGAGGCCGAGGAGCTGCTGGAGGAGATGGAGGAGAAGGGCATCAAGCCCGACGTGGTGACATACACCACCCTGATCGACGGCCTGTGCAAGGCCGGCAAAGTGGACGAGGCCCTGGAGCTGTTCGACGAGATGAAGGAGAGGGGCATCAAGCCCGACGTGGTCACATACACCACACTGATCGACGGACTGTGTAAAGCCGGCGACGTGGACGAAGCCCTCGAGCTGTTC…
PPR2.0	t4	GGCAAAAAGAUCACUGUA	MGNSVVTYTTLIDGLCKAGKVDEALELFDEMKERGIKPDVVTYTTLIDGLCKAGKVDEALELFDEMKERGIKPDVVTYNTLIDGLCKSGKIEEALKLFKEMEEKGITPSVVTYTTLIDGLCKAGDVDEALELFKEMRSKGVKPNVVTYTTLIDGLCKAGDVDEALELFKEMRSKGVKPNVVTYTTLIDGLCKAGDVDEALELFKEMRSKGVKPNVVTYTTLIDGLCKAGDVDEALELFKEMRSKGVKPNVVTYTTLIDGLCKAGDVDEALELFKEMRSKGVKPNVVTYTTLIDGLCKAGKVDEALELFDEMKERGIKPDVVTYTTLIDGLCKAGDVDEALELFKEMRSKGVKPNVVTYNTLIDGLCKAGRLDEAEELLEEMEEKGIKPDVVTYNTLIDG…	ATGGGAAACTCCGTGGTCACATACACCACCCTGATCGACGGCCTGTGCAAGGCCGGCAAGGTGGACGAAGCCCTGGAGCTGTTCGACGAGATGAAGGAGAGGGGCATCAAGCCCGACGTGGTCACATACACCACCCTGATCGACGGCCTGTGCAAGGCCGGCAAGGTGGATGAGGCCCTGGAGCTGTTCGACGAGATGAAGGAGAGGGGCATCAAGCCCGACGTGGTCACATACAACACCCTGATCGACGGCCTGTGCAAGAGCGGCAAGATCGAGGAGGCCCTGAAGCTGTTCAAGGAGATGGAGGAGAAGGGCATCACCCCCAGCGTGGTCACATACACCACACTGATCGACGGACTGTGTAAAGCCGGCGACGTGGACGAAGCCCTCGAGCTGTTC…
PPR2.0	t5	CAACAUCAGUCUGAUAAG	MGNSVVTYNTLIDGLCKSGKIEEALKLFKEMEEKGITPSVVTYTTLIDGLCKAGDVDEALELFKEMRSKGVKPNVVTYTTLIDGLCKAGDVDEALELFKEMRSKGVKPNVVTYNTLIDGLCKSGKIEEALKLFKEMEEKGITPSVVTYTTLIDGLCKAGDVDEALELFKEMRSKGVKPNVVTYNTLIDGLCKAGRLDEAEELLEEMEEKGIKPDVVTYNTLIDGLCKSGKIEEALKLFKEMEEKGITPSVVTYTTLIDGLCKAGDVDEALELFKEMRSKGVKPNVVTYTTLIDGLCKAGKVDEALELFDEMKERGIKPDVVTYNTLIDGLCKAGRLDEAEELLEEMEEKGIKPDVVTYNTLIDGLCKSGKIEEALKLFKEMEEKGITPSVVTYNTLIDG…	ATGGGAAACTCCGTGGTCACATACAACACCCTGATCGACGGCCTGTGCAAGAGCGGCAAGATCGAGGAGGCCCTGAAGCTGTTCAAGGAGATGGAGGAGAAGGGCATCACCCCCAGCGTGGTCACATACACCACACTGATCGACGGACTGTGTAAAGCCGGCGACGTGGACGAAGCCCTCGAGCTGTTCAAAGAGATGCGGAGCAAGGGCGTGAAGCCCAACGTGGTGACATACACCACACTGATCGACGGACTGTGTAAAGCCGGCGACGTGGACGAAGCCCTCGAGCTGTTCAAAGAGATGCGGAGCAAGGGCGTGAAGCCCAACGTGGTCACATACAACACCCTGATCGACGGCCTGTGCAAGAGCGGCAAGATCGAGGAGGCCCTGAAGCTGTTC…
PPR2.0	t6	CACAAUGUGGCCGAGGAC	MGNSVVTYNTLIDGLCKSGKIEEALKLFKEMEEKGITPSVVTYTTLIDGLCKAGDVDEALELFKEMRSKGVKPNVVTYNTLIDGLCKSGKIEEALKLFKEMEEKGITPSVVTYTTLIDGLCKAGDVDEALELFKEMRSKGVKPNVVTYTTLIDGLCKAGDVDEALELFKEMRSKGVKPNVVTYNTLIDGLCKAGRLDEAEELLEEMEEKGIKPDVVTYTTLIDGLCKAGKVDEALELFDEMKERGIKPDVVTYNTLIDGLCKAGRLDEAEELLEEMEEKGIKPDVVTYTTLIDGLCKAGKVDEALELFDEMKERGIKPDVVTYTTLIDGLCKAGKVDEALELFDEMKERGIKPDVVTYNTLIDGLCKSGKIEEALKLFKEMEEKGITPSVVTYNTLIDG…	ATGGGAAACTCCGTGGTCACATACAACACCCTGATCGACGGCCTGTGCAAGAGCGGCAAGATCGAGGAGGCCCTGAAGCTGTTCAAGGAGATGGAGGAGAAGGGCATCACCCCCAGCGTGGTCACATACACCACACTGATCGACGGACTGTGTAAAGCCGGCGACGTGGACGAAGCCCTCGAGCTGTTCAAAGAGATGCGGAGCAAGGGCGTGAAGCCCAACGTGGTCACATACAACACCCTGATCGACGGCCTGTGCAAGAGCGGCAAGATCGAGGAGGCCCTGAAGCTGTTCAAGGAGATGGAGGAGAAGGGCATCACCCCCAGCGTGGTCACATACACCACACTGATCGACGGACTGTGTAAAGCCGGCGACGTGGACGAAGCCCTCGAGCTGTTC…
PPR2.0	t7	AAGCCAGUUUUCAUUUUG	MGNSVVTYTTLIDGLCKAGDVDEALELFKEMRSKGVKPNVVTYTTLIDGLCKAGDVDEALELFKEMRSKGVKPNVVTYTTLIDGLCKAGKVDEALELFDEMKERGIKPDVVTYNTLIDGLCKSGKIEEALKLFKEMEEKGITPSVVTYNTLIDGLCKSGKIEEALKLFKEMEEKGITPSVVTYTTLIDGLCKAGDVDEALELFKEMRSKGVKPNVVTYTTLIDGLCKAGKVDEALELFDEMKERGIKPDVVTYNTLIDGLCKAGRLDEAEELLEEMEEKGIKPDVVTYNTLIDGLCKAGRLDEAEELLEEMEEKGIKPDVVTYNTLIDGLCKAGRLDEAEELLEEMEEKGIKPDVVTYNTLIDGLCKAGRLDEAEELLEEMEEKGIKPDVVTYNTLIDG…	ATGGGAAACTCCGTGGTCACATACACCACACTGATCGACGGACTGTGTAAAGCCGGCGACGTGGACGAAGCCCTCGAGCTGTTCAAAGAGATGCGGAGCAAGGGCGTGAAGCCCAACGTGGTCACATACACCACACTGATCGACGGACTGTGTAAAGCCGGCGACGTGGACGAAGCCCTCGAGCTGTTCAAAGAGATGCGGAGCAAGGGCGTGAAGCCCAACGTGGTCACATACACCACCCTGATCGACGGCCTGTGCAAGGCCGGCAAAGTGGACGAGGCCCTGGAGCTGTTCGACGAGATGAAGGAGAGGGGCATCAAGCCCGACGTGGTCACATACAACACCCTGATCGACGGCCTGTGCAAGAGCGGCAAGATCGAGGAGGCCCTGAAGCTGTTC…
PPR2.0	t8	CACUAUUUAAGUUAUCAA	MGNSVVTYNTLIDGLCKSGKIEEALKLFKEMEEKGITPSVVTYTTLIDGLCKAGDVDEALELFKEMRSKGVKPNVVTYNTLIDGLCKSGKIEEALKLFKEMEEKGITPSVVTYNTLIDGLCKAGRLDEAEELLEEMEEKGIKPDVVTYTTLIDGLCKAGDVDEALELFKEMRSKGVKPNVVTYNTLIDGLCKAGRLDEAEELLEEMEEKGIKPDVVTYNTLIDGLCKAGRLDEAEELLEEMEEKGIKPDVVTYNTLIDGLCKAGRLDEAEELLEEMEEKGIKPDVVTYTTLIDGLCKAGDVDEALELFKEMRSKGVKPNVVTYTTLIDGLCKAGDVDEALELFKEMRSKGVKPNVVTYTTLIDGLCKAGKVDEALELFDEMKERGIKPDVVTYNTLIDG…	ATGGGAAACTCCGTGGTCACATACAACACCCTGATCGACGGCCTGTGCAAGAGCGGCAAGATCGAGGAGGCCCTGAAGCTGTTCAAGGAGATGGAGGAGAAGGGCATCACCCCCAGCGTGGTCACATACACCACACTGATCGACGGACTGTGTAAAGCCGGCGACGTGGACGAAGCCCTCGAGCTGTTCAAAGAGATGCGGAGCAAGGGCGTGAAGCCCAACGTGGTCACATACAACACCCTGATCGACGGCCTGTGCAAGAGCGGCAAGATCGAGGAGGCCCTGAAGCTGTTCAAGGAGATGGAGGAGAAGGGCATCACCCCCAGCGTGGTCACATACAACACCCTGATCGACGGCCTGTGCAAGGCCGGCAGACTGGACGAGGCCGAAGAGCTGCTG…
PPR2.0	t9	CAAACUUUCACUUUGAAA	MGNSVVTYNTLIDGLCKSGKIEEALKLFKEMEEKGITPSVVTYTTLIDGLCKAGDVDEALELFKEMRSKGVKPNVVTYTTLIDGLCKAGDVDEALELFKEMRSKGVKPNVVTYTTLIDGLCKAGDVDEALELFKEMRSKGVKPNVVTYNTLIDGLCKSGKIEEALKLFKEMEEKGITPSVVTYNTLIDGLCKAGRLDEAEELLEEMEEKGIKPDVVTYNTLIDGLCKAGRLDEAEELLEEMEEKGIKPDVVTYNTLIDGLCKAGRLDEAEELLEEMEEKGIKPDVVTYNTLIDGLCKSGKIEEALKLFKEMEEKGITPSVVTYTTLIDGLCKAGDVDEALELFKEMRSKGVKPNVVTYNTLIDGLCKSGKIEEALKLFKEMEEKGITPSVVTYNTLIDG…	ATGGGAAACTCCGTGGTCACATACAACACCCTGATCGACGGCCTGTGCAAGAGCGGCAAGATCGAGGAGGCCCTGAAGCTGTTCAAGGAGATGGAGGAGAAGGGCATCACCCCCAGCGTGGTCACATACACCACACTGATCGACGGACTGTGTAAAGCCGGCGACGTGGACGAAGCCCTCGAGCTGTTCAAAGAGATGCGGAGCAAGGGCGTGAAGCCCAACGTGGTCACATACACCACACTGATCGACGGACTGTGTAAAGCCGGCGACGTGGACGAAGCCCTCGAGCTGTTCAAAGAGATGCGGAGCAAGGGCGTGAAGCCCAACGTGGTCACATACACCACACTGATCGACGGACTGTGTAAAGCCGGCGACGTGGACGAAGCCCTCGAGCTGTTC…
PPR2.0	t10	GGUGGUGAGGCCCUGGGC	MGNSVVTYTTLIDGLCKAGKVDEALELFDEMKERGIKPDVVTYTTLIDGLCKAGKVDEALELFDEMKERGIKPDVVTYNTLIDGLCKAGRLDEAEELLEEMEEKGIKPDVVTYTTLIDGLCKAGKVDEALELFDEMKERGIKPDVVTYTTLIDGLCKAGKVDEALELFDEMKERGIKPDVVTYNTLIDGLCKAGRLDEAEELLEEMEEKGIKPDVVTYTTLIDGLCKAGKVDEALELFDEMKERGIKPDVVTYTTLIDGLCKAGDVDEALELFKEMRSKGVKPNVVTYTTLIDGLCKAGKVDEALELFDEMKERGIKPDVVTYTTLIDGLCKAGKVDEALELFDEMKERGIKPDVVTYNTLIDGLCKSGKIEEALKLFKEMEEKGITPSVVTYNTLIDG…	ATGGGAAACTCCGTGGTCACATACACCACCCTGATCGACGGCCTGTGCAAGGCCGGCAAGGTGGATGAGGCCCTGGAGCTGTTCGACGAGATGAAGGAGAGGGGCATCAAGCCCGACGTGGTCACATACACCACCCTGATCGACGGCCTGTGCAAGGCCGGCAAGGTGGATGAGGCCCTGGAGCTGTTCGACGAGATGAAGGAGAGGGGCATCAAGCCCGACGTGGTGACATACAACACCCTGATCGACGGCCTGTGCAAGGCCGGCAGACTGGATGAGGCCGAGGAGCTGCTGGAGGAGATGGAGGAGAAGGGCATCAAGCCCGACGTGGTCACATACACCACCCTGATCGACGGCCTGTGCAAGGCCGGCAAGGTGGATGAGGCCCTGGAGCTGTTC…
PPR2.0	t11	GACUCAGGAAUCGGCUCU	MGNSVVTYTTLIDGLCKAGKVDEALELFDEMKERGIKPDVVTYTTLIDGLCKAGDVDEALELFKEMRSKGVKPNVVTYNTLIDGLCKSGKIEEALKLFKEMEEKGITPSVVTYNTLIDGLCKAGRLDEAEELLEEMEEKGIKPDVVTYNTLIDGLCKSGKIEEALKLFKEMEEKGITPSVVTYTTLIDGLCKAGDVDEALELFKEMRSKGVKPNVVTYTTLIDGLCKAGKVDEALELFDEMKERGIKPDVVTYTTLIDGLCKAGKVDEALELFDEMKERGIKPDVVTYTTLIDGLCKAGDVDEALELFKEMRSKGVKPNVVTYTTLIDGLCKAGDVDEALELFKEMRSKGVKPNVVTYNTLIDGLCKAGRLDEAEELLEEMEEKGIKPDVVTYNTLIDG…	ATGGGAAACTCCGTGGTCACATACACCACCCTGATCGACGGCCTGTGCAAGGCCGGCAAGGTGGATGAGGCCCTGGAGCTGTTCGACGAGATGAAGGAGAGGGGCATCAAGCCCGACGTGGTCACATACACCACACTGATCGACGGACTGTGTAAAGCCGGCGACGTGGACGAAGCCCTCGAGCTGTTCAAAGAGATGCGGAGCAAGGGCGTGAAGCCCAACGTGGTGACATACAACACCCTGATCGACGGCCTGTGCAAGAGCGGCAAGATCGAGGAGGCCCTGAAGCTGTTCAAGGAGATGGAGGAGAAGGGCATCACCCCCAGCGTGGTCACATACAACACCCTGATCGACGGCCTGTGCAAGGCCGGCAGACTGGATGAGGCCGAGGAGCTGCTG…
PPR2.0	t12	CAACAUCAAAGACACCAU	MGNSVVTYNTLIDGLCKSGKIEEALKLFKEMEEKGITPSVVTYTTLIDGLCKAGDVDEALELFKEMRSKGVKPNVVTYTTLIDGLCKAGDVDEALELFKEMRSKGVKPNVVTYNTLIDGLCKSGKIEEALKLFKEMEEKGITPSVVTYTTLIDGLCKAGDVDEALELFKEMRSKGVKPNVVTYNTLIDGLCKAGRLDEAEELLEEMEEKGIKPDVVTYNTLIDGLCKSGKIEEALKLFKEMEEKGITPSVVTYTTLIDGLCKAGDVDEALELFKEMRSKGVKPNVVTYTTLIDGLCKAGDVDEALELFKEMRSKGVKPNVVTYTTLIDGLCKAGDVDEALELFKEMRSKGVKPNVVTYTTLIDGLCKAGKVDEALELFDEMKERGIKPDVVTYTTLIDG…	ATGGGAAACTCCGTGGTCACATACAACACCCTGATCGACGGCCTGTGCAAGAGCGGCAAGATCGAGGAGGCCCTGAAGCTGTTCAAGGAGATGGAGGAGAAGGGCATCACCCCCAGCGTGGTCACATACACCACACTGATCGACGGACTGTGTAAAGCCGGCGACGTGGACGAAGCCCTCGAGCTGTTCAAAGAGATGCGGAGCAAGGGCGTGAAGCCCAACGTGGTGACATACACCACACTGATCGACGGACTGTGTAAAGCCGGCGACGTGGACGAAGCCCTCGAGCTGTTCAAAGAGATGCGGAGCAAGGGCGTGAAGCCCAACGTGGTCACATACAACACCCTGATCGACGGCCTGTGCAAGAGCGGCAAGATCGAGGAGGCCCTGAAGCTGTTC…
PPR2.0	t13	GUCAGAGGGUUCUGGAUU	MGNSVVTYTTLIDGLCKAGKVDEALELFDEMKERGIKPDVVTYNTLIDGLCKAGRLDEAEELLEEMEEKGIKPDVVTYNTLIDGLCKSGKIEEALKLFKEMEEKGITPSVVTYTTLIDGLCKAGDVDEALELFKEMRSKGVKPNVVTYTTLIDGLCKAGKVDEALELFDEMKERGIKPDVVTYTTLIDGLCKAGDVDEALELFKEMRSKGVKPNVVTYTTLIDGLCKAGKVDEALELFDEMKERGIKPDVVTYTTLIDGLCKAGKVDEALELFDEMKERGIKPDVVTYTTLIDGLCKAGKVDEALELFDEMKERGIKPDVVTYNTLIDGLCKAGRLDEAEELLEEMEEKGIKPDVVTYNTLIDGLCKAGRLDEAEELLEEMEEKGIKPDVVTYNTLIDG…	ATGGGAAACTCCGTGGTCACATACACCACCCTGATCGACGGCCTGTGCAAGGCCGGCAAGGTGGATGAGGCCCTGGAGCTGTTCGACGAGATGAAGGAGAGGGGCATCAAGCCCGACGTGGTCACATACAACACCCTGATCGACGGCCTGTGCAAGGCCGGCAGACTGGATGAGGCCGAGGAGCTGCTGGAGGAGATGGAGGAGAAGGGCATCAAGCCCGACGTGGTGACATACAACACCCTGATCGACGGCCTGTGCAAGAGCGGCAAGATCGAGGAGGCCCTGAAGCTGTTCAAGGAGATGGAGGAGAAGGGCATCACCCCCAGCGTGGTCACATACACCACACTGATCGACGGACTGTGTAAAGCCGGCGACGTGGACGAAGCCCTCGAGCTGTTC…
PPR2.0	t14	GCAGAUAAUUAAUAAGAA	MGNSVVTYTTLIDGLCKAGKVDEALELFDEMKERGIKPDVVTYNTLIDGLCKSGKIEEALKLFKEMEEKGITPSVVTYTTLIDGLCKAGDVDEALELFKEMRSKGVKPNVVTYTTLIDGLCKAGKVDEALELFDEMKERGIKPDVVTYTTLIDGLCKAGDVDEALELFKEMRSKGVKPNVVTYNTLIDGLCKAGRLDEAEELLEEMEEKGIKPDVVTYTTLIDGLCKAGDVDEALELFKEMRSKGVKPNVVTYTTLIDGLCKAGDVDEALELFKEMRSKGVKPNVVTYNTLIDGLCKAGRLDEAEELLEEMEEKGIKPDVVTYNTLIDGLCKAGRLDEAEELLEEMEEKGIKPDVVTYTTLIDGLCKAGDVDEALELFKEMRSKGVKPNVVTYTTLIDG…	ATGGGAAACTCCGTGGTCACATACACCACCCTGATCGACGGCCTGTGCAAGGCCGGCAAGGTGGATGAGGCCCTGGAGCTGTTCGACGAGATGAAGGAGAGGGGCATCAAGCCCGACGTGGTCACATACAACACCCTGATCGACGGCCTGTGCAAGAGCGGCAAGATCGAGGAGGCCCTGAAGCTGTTCAAGGAGATGGAGGAGAAGGGCATCACCCCCAGCGTGGTGACATACACCACACTGATCGACGGACTGTGTAAAGCCGGCGACGTGGACGAAGCCCTCGAGCTGTTCAAAGAGATGCGGAGCAAGGGCGTGAAGCCCAACGTGGTCACATACACCACCCTGATCGACGGCCTGTGCAAGGCCGGCAAGGTGGATGAGGCCCTGGAGCTGTTC…
PPR2.0	t15	AAGGAUAAUAUCAAACAC	MGNSVVTYTTLIDGLCKAGDVDEALELFKEMRSKGVKPNVVTYTTLIDGLCKAGDVDEALELFKEMRSKGVKPNVVTYTTLIDGLCKAGKVDEALELFDEMKERGIKPDVVTYTTLIDGLCKAGKVDEALELFDEMKERGIKPDVVTYTTLIDGLCKAGDVDEALELFKEMRSKGVKPNVVTYNTLIDGLCKAGRLDEAEELLEEMEEKGIKPDVVTYTTLIDGLCKAGDVDEALELFKEMRSKGVKPNVVTYTTLIDGLCKAGDVDEALELFKEMRSKGVKPNVVTYNTLIDGLCKAGRLDEAEELLEEMEEKGIKPDVVTYTTLIDGLCKAGDVDEALELFKEMRSKGVKPNVVTYNTLIDGLCKAGRLDEAEELLEEMEEKGIKPDVVTYNTLIDG…	ATGGGAAACTCCGTGGTCACATACACCACACTGATCGACGGACTGTGTAAAGCCGGCGACGTGGACGAAGCCCTCGAGCTGTTCAAAGAGATGCGGAGCAAGGGCGTGAAGCCCAACGTGGTCACATACACCACACTGATCGACGGACTGTGTAAAGCCGGCGACGTGGACGAAGCCCTCGAGCTGTTCAAAGAGATGCGGAGCAAGGGCGTGAAGCCCAACGTGGTGACATACACCACCCTGATCGACGGCCTGTGCAAGGCCGGCAAAGTGGACGAGGCCCTGGAGCTGTTCGACGAGATGAAGGAGAGGGGCATCAAGCCCGACGTGGTCACATACACCACCCTGATCGACGGCCTGTGCAAGGCCGGCAAGGTGGATGAGGCCCTGGAGCTGTTC…
PPR2.0	t16	UUAUCAGACUGAUGUUGA	MGNSVVTYNTLIDGLCKAGRLDEAEELLEEMEEKGIKPDVVTYNTLIDGLCKAGRLDEAEELLEEMEEKGIKPDVVTYTTLIDGLCKAGDVDEALELFKEMRSKGVKPNVVTYNTLIDGLCKAGRLDEAEELLEEMEEKGIKPDVVTYNTLIDGLCKSGKIEEALKLFKEMEEKGITPSVVTYTTLIDGLCKAGDVDEALELFKEMRSKGVKPNVVTYTTLIDGLCKAGKVDEALELFDEMKERGIKPDVVTYTTLIDGLCKAGDVDEALELFKEMRSKGVKPNVVTYNTLIDGLCKSGKIEEALKLFKEMEEKGITPSVVTYNTLIDGLCKAGRLDEAEELLEEMEEKGIKPDVVTYTTLIDGLCKAGKVDEALELFDEMKERGIKPDVVTYTTLIDG…	ATGGGAAACTCCGTGGTCACATACAACACCCTGATCGACGGCCTGTGCAAGGCCGGCAGACTGGATGAGGCCGAGGAGCTGCTGGAGGAGATGGAGGAGAAGGGCATCAAGCCCGACGTGGTCACATACAACACCCTGATCGACGGCCTGTGCAAGGCCGGCAGACTGGATGAGGCCGAGGAGCTGCTGGAGGAGATGGAGGAGAAGGGCATCAAGCCCGACGTGGTGACATACACCACACTGATCGACGGACTGTGTAAAGCCGGCGACGTGGACGAAGCCCTCGAGCTGTTCAAAGAGATGCGGAGCAAGGGCGTGAAGCCCAACGTGGTCACATACAACACCCTGATCGACGGCCTGTGCAAGGCCGGCAGACTGGATGAGGCCGAGGAGCTGCTG…
PPR2.0	t17	GGUUAGAGAUACAGUGUG	MGNSVVTYTTLIDGLCKAGKVDEALELFDEMKERGIKPDVVTYTTLIDGLCKAGKVDEALELFDEMKERGIKPDVVTYNTLIDGLCKAGRLDEAEELLEEMEEKGIKPDVVTYNTLIDGLCKAGRLDEAEELLEEMEEKGIKPDVVTYTTLIDGLCKAGDVDEALELFKEMRSKGVKPNVVTYTTLIDGLCKAGKVDEALELFDEMKERGIKPDVVTYTTLIDGLCKAGDVDEALELFKEMRSKGVKPNVVTYTTLIDGLCKAGKVDEALELFDEMKERGIKPDVVTYTTLIDGLCKAGDVDEALELFKEMRSKGVKPNVVTYNTLIDGLCKAGRLDEAEELLEEMEEKGIKPDVVTYTTLIDGLCKAGDVDEALELFKEMRSKGVKPNVVTYNTLIDG…	ATGGGAAACTCCGTGGTCACATACACCACCCTGATCGACGGCCTGTGCAAGGCCGGCAAGGTGGACGAAGCCCTGGAGCTGTTCGACGAGATGAAGGAGAGGGGCATCAAGCCCGACGTGGTCACATACACCACCCTGATCGACGGCCTGTGCAAGGCCGGCAAGGTGGATGAGGCCCTGGAGCTGTTCGACGAGATGAAGGAGAGGGGCATCAAGCCCGACGTGGTCACATACAACACCCTGATCGACGGCCTGTGCAAGGCCGGCAGACTGGATGAGGCCGAGGAGCTGCTGGAGGAGATGGAGGAGAAGGGCATCAAGCCCGACGTGGTCACATACAACACCCTGATCGACGGCCTGTGCAAGGCCGGCAGACTGGACGAGGCCGAAGAGCTGCTG…
PPR2.0	t18	GUGGGGGUGGUAGGAAAU	MGNSVVTYTTLIDGLCKAGKVDEALELFDEMKERGIKPDVVTYNTLIDGLCKAGRLDEAEELLEEMEEKGIKPDVVTYTTLIDGLCKAGKVDEALELFDEMKERGIKPDVVTYTTLIDGLCKAGKVDEALELFDEMKERGIKPDVVTYTTLIDGLCKAGKVDEALELFDEMKERGIKPDVVTYTTLIDGLCKAGKVDEALELFDEMKERGIKPDVVTYTTLIDGLCKAGKVDEALELFDEMKERGIKPDVVTYNTLIDGLCKAGRLDEAEELLEEMEEKGIKPDVVTYTTLIDGLCKAGKVDEALELFDEMKERGIKPDVVTYTTLIDGLCKAGKVDEALELFDEMKERGIKPDVVTYNTLIDGLCKAGRLDEAEELLEEMEEKGIKPDVVTYTTLIDG…	ATGGGAAACTCCGTGGTCACATACACCACCCTGATCGACGGCCTGTGCAAGGCCGGCAAGGTGGACGAAGCCCTGGAGCTGTTCGACGAGATGAAGGAGAGGGGCATCAAGCCCGACGTGGTCACATACAACACCCTGATCGACGGCCTGTGCAAGGCCGGCAGACTGGATGAGGCCGAGGAGCTGCTGGAGGAGATGGAGGAGAAGGGCATCAAGCCCGACGTGGTCACATACACCACCCTGATCGACGGCCTGTGCAAGGCCGGCAAAGTGGACGAGGCCCTGGAGCTGTTCGACGAGATGAAGGAGAGGGGCATCAAGCCCGACGTGGTCACATACACCACCCTGATCGACGGCCTGTGCAAGGCCGGCAAGGTGGACGAAGCCCTGGAGCTGTTC…
PPR2.0	t19	GUGAUGUGGAGUUAAGGC	MGNSVVTYTTLIDGLCKAGKVDEALELFDEMKERGIKPDVVTYNTLIDGLCKAGRLDEAEELLEEMEEKGIKPDVVTYTTLIDGLCKAGKVDEALELFDEMKERGIKPDVVTYTTLIDGLCKAGDVDEALELFKEMRSKGVKPNVVTYNTLIDGLCKAGRLDEAEELLEEMEEKGIKPDVVTYTTLIDGLCKAGKVDEALELFDEMKERGIKPDVVTYNTLIDGLCKAGRLDEAEELLEEMEEKGIKPDVVTYTTLIDGLCKAGKVDEALELFDEMKERGIKPDVVTYTTLIDGLCKAGKVDEALELFDEMKERGIKPDVVTYTTLIDGLCKAGDVDEALELFKEMRSKGVKPNVVTYTTLIDGLCKAGKVDEALELFDEMKERGIKPDVVTYNTLIDG…	ATGGGAAACTCCGTGGTCACATACACCACCCTGATCGACGGCCTGTGCAAGGCCGGCAAGGTGGACGAAGCCCTGGAGCTGTTCGACGAGATGAAGGAGAGGGGCATCAAGCCCGACGTGGTCACATACAACACCCTGATCGACGGCCTGTGCAAGGCCGGCAGACTGGATGAGGCCGAGGAGCTGCTGGAGGAGATGGAGGAGAAGGGCATCAAGCCCGACGTGGTCACATACACCACCCTGATCGACGGCCTGTGCAAGGCCGGCAAAGTGGACGAGGCCCTGGAGCTGTTCGACGAGATGAAGGAGAGGGGCATCAAGCCCGACGTGGTCACATACACCACACTGATCGACGGACTGTGTAAAGCCGGCGACGTGGACGAAGCCCTCGAGCTGTTC…
PPR2.0	t20	GGAAGAGUGUCUGGAGCA	MGNSVVTYTTLIDGLCKAGKVDEALELFDEMKERGIKPDVVTYTTLIDGLCKAGKVDEALELFDEMKERGIKPDVVTYTTLIDGLCKAGDVDEALELFKEMRSKGVKPNVVTYTTLIDGLCKAGDVDEALELFKEMRSKGVKPNVVTYTTLIDGLCKAGKVDEALELFDEMKERGIKPDVVTYTTLIDGLCKAGDVDEALELFKEMRSKGVKPNVVTYTTLIDGLCKAGKVDEALELFDEMKERGIKPDVVTYNTLIDGLCKAGRLDEAEELLEEMEEKGIKPDVVTYTTLIDGLCKAGKVDEALELFDEMKERGIKPDVVTYNTLIDGLCKAGRLDEAEELLEEMEEKGIKPDVVTYNTLIDGLCKSGKIEEALKLFKEMEEKGITPSVVTYNTLIDG…	ATGGGAAACTCCGTGGTCACATACACCACCCTGATCGACGGCCTGTGCAAGGCCGGCAAGGTGGACGAAGCCCTGGAGCTGTTCGACGAGATGAAGGAGAGGGGCATCAAGCCCGACGTGGTCACATACACCACCCTGATCGACGGCCTGTGCAAGGCCGGCAAGGTGGATGAGGCCCTGGAGCTGTTCGACGAGATGAAGGAGAGGGGCATCAAGCCCGACGTGGTCACATACACCACACTGATCGACGGACTGTGTAAAGCCGGCGACGTGGACGAAGCCCTCGAGCTGTTCAAAGAGATGCGGAGCAAGGGCGTGAAGCCCAACGTGGTCACATACACCACACTGATCGACGGACTGTGTAAAGCCGGCGACGTGGACGAAGCCCTCGAGCTGTTC…
PPR2.0	t21	UGAUGAUGAUGAUGAUGA	MGNSVVTYNTLIDGLCKAGRLDEAEELLEEMEEKGIKPDVVTYTTLIDGLCKAGKVDEALELFDEMKERGIKPDVVTYTTLIDGLCKAGDVDEALELFKEMRSKGVKPNVVTYNTLIDGLCKAGRLDEAEELLEEMEEKGIKPDVVTYTTLIDGLCKAGKVDEALELFDEMKERGIKPDVVTYTTLIDGLCKAGDVDEALELFKEMRSKGVKPNVVTYNTLIDGLCKAGRLDEAEELLEEMEEKGIKPDVVTYTTLIDGLCKAGKVDEALELFDEMKERGIKPDVVTYTTLIDGLCKAGDVDEALELFKEMRSKGVKPNVVTYNTLIDGLCKAGRLDEAEELLEEMEEKGIKPDVVTYTTLIDGLCKAGKVDEALELFDEMKERGIKPDVVTYTTLIDG…	ATGGGAAACTCCGTGGTCACATACAACACCCTGATCGACGGCCTGTGCAAGGCCGGCAGACTGGATGAGGCCGAGGAGCTGCTGGAGGAGATGGAGGAGAAGGGCATCAAGCCCGACGTGGTCACATACACCACCCTGATCGACGGCCTGTGCAAGGCCGGCAAGGTGGATGAGGCCCTGGAGCTGTTCGACGAGATGAAGGAGAGGGGCATCAAGCCCGACGTGGTGACATACACCACACTGATCGACGGACTGTGTAAAGCCGGCGACGTGGACGAAGCCCTCGAGCTGTTCAAAGAGATGCGGAGCAAGGGCGTGAAGCCCAACGTGGTCACATACAACACCCTGATCGACGGCCTGTGCAAGGCCGGCAGACTGGATGAGGCCGAGGAGCTGCTG…
PPR2.0	t22	UCUUUGCCAUUUCCCAUA	MGNSVVTYNTLIDGLCKAGRLDEAEELLEEMEEKGIKPDVVTYNTLIDGLCKSGKIEEALKLFKEMEEKGITPSVVTYNTLIDGLCKAGRLDEAEELLEEMEEKGIKPDVVTYNTLIDGLCKAGRLDEAEELLEEMEEKGIKPDVVTYNTLIDGLCKAGRLDEAEELLEEMEEKGIKPDVVTYTTLIDGLCKAGKVDEALELFDEMKERGIKPDVVTYNTLIDGLCKSGKIEEALKLFKEMEEKGITPSVVTYNTLIDGLCKSGKIEEALKLFKEMEEKGITPSVVTYTTLIDGLCKAGDVDEALELFKEMRSKGVKPNVVTYNTLIDGLCKAGRLDEAEELLEEMEEKGIKPDVVTYNTLIDGLCKAGRLDEAEELLEEMEEKGIKPDVVTYNTLIDG…	ATGGGAAACTCCGTGGTCACATACAACACCCTGATCGACGGCCTGTGCAAGGCCGGCAGACTGGATGAGGCCGAGGAGCTGCTGGAGGAGATGGAGGAGAAGGGCATCAAGCCCGACGTGGTCACATACAACACCCTGATCGACGGCCTGTGCAAGAGCGGCAAGATCGAGGAGGCCCTGAAGCTGTTCAAGGAGATGGAGGAGAAGGGCATCACCCCCAGCGTGGTGACATACAACACCCTGATCGACGGCCTGTGCAAGGCCGGCAGACTGGATGAGGCCGAGGAGCTGCTGGAGGAGATGGAGGAGAAGGGCATCAAGCCCGACGTGGTCACATACAACACCCTGATCGACGGCCTGTGCAAGGCCGGCAGACTGGATGAGGCCGAGGAGCTGCTG…
PPR2.0	t23	CCCAUAGAUGUGACAAGC	MGNSVVTYNTLIDGLCKSGKIEEALKLFKEMEEKGITPSVVTYNTLIDGLCKSGKIEEALKLFKEMEEKGITPSVVTYNTLIDGLCKSGKIEEALKLFKEMEEKGITPSVVTYTTLIDGLCKAGDVDEALELFKEMRSKGVKPNVVTYNTLIDGLCKAGRLDEAEELLEEMEEKGIKPDVVTYTTLIDGLCKAGDVDEALELFKEMRSKGVKPNVVTYTTLIDGLCKAGKVDEALELFDEMKERGIKPDVVTYTTLIDGLCKAGDVDEALELFKEMRSKGVKPNVVTYNTLIDGLCKAGRLDEAEELLEEMEEKGIKPDVVTYTTLIDGLCKAGKVDEALELFDEMKERGIKPDVVTYNTLIDGLCKAGRLDEAEELLEEMEEKGIKPDVVTYTTLIDG…	ATGGGAAACTCCGTGGTCACATACAACACCCTGATCGACGGCCTGTGCAAGAGCGGCAAGATCGAGGAGGCCCTGAAGCTGTTCAAGGAGATGGAGGAGAAGGGCATCACCCCCAGCGTGGTCACATACAACACCCTGATCGACGGCCTGTGCAAGAGCGGCAAGATCGAGGAGGCCCTGAAGCTGTTCAAGGAGATGGAGGAGAAGGGCATCACCCCCAGCGTGGTGACATACAACACCCTGATCGACGGCCTGTGCAAGAGCGGCAAGATCGAGGAGGCCCTGAAGCTGTTCAAGGAGATGGAGGAGAAGGGCATCACCCCCAGCGTGGTCACATACACCACACTGATCGACGGACTGTGTAAAGCCGGCGACGTGGACGAAGCCCTCGAGCTGTTC…
PPR2.0	t24	GGCGGGGCACUGUGCGUG	MGNSVVTYTTLIDGLCKAGKVDEALELFDEMKERGIKPDVVTYTTLIDGLCKAGKVDEALELFDEMKERGIKPDVVTYNTLIDGLCKSGKIEEALKLFKEMEEKGITPSVVTYTTLIDGLCKAGKVDEALELFDEMKERGIKPDVVTYTTLIDGLCKAGKVDEALELFDEMKERGIKPDVVTYTTLIDGLCKAGKVDEALELFDEMKERGIKPDVVTYTTLIDGLCKAGKVDEALELFDEMKERGIKPDVVTYNTLIDGLCKSGKIEEALKLFKEMEEKGITPSVVTYTTLIDGLCKAGDVDEALELFKEMRSKGVKPNVVTYNTLIDGLCKSGKIEEALKLFKEMEEKGITPSVVTYNTLIDGLCKAGRLDEAEELLEEMEEKGIKPDVVTYTTLIDG…	ATGGGAAACTCCGTGGTCACATACACCACCCTGATCGACGGCCTGTGCAAGGCCGGCAAGGTGGACGAAGCCCTGGAGCTGTTCGACGAGATGAAGGAGAGGGGCATCAAGCCCGACGTGGTCACATACACCACCCTGATCGACGGCCTGTGCAAGGCCGGCAAGGTGGATGAGGCCCTGGAGCTGTTCGACGAGATGAAGGAGAGGGGCATCAAGCCCGACGTGGTCACATACAACACCCTGATCGACGGCCTGTGCAAGAGCGGCAAGATCGAGGAGGCCCTGAAGCTGTTCAAGGAGATGGAGGAGAAGGGCATCACCCCCAGCGTGGTCACATACACCACCCTGATCGACGGCCTGTGCAAGGCCGGCAAGGTGGACGAAGCCCTGGAGCTGTTC…
PPR2.0	t25	GUGAAGGUGACAGCAGUC	MGNSVVTYTTLIDGLCKAGKVDEALELFDEMKERGIKPDVVTYNTLIDGLCKAGRLDEAEELLEEMEEKGIKPDVVTYTTLIDGLCKAGKVDEALELFDEMKERGIKPDVVTYTTLIDGLCKAGDVDEALELFKEMRSKGVKPNVVTYTTLIDGLCKAGDVDEALELFKEMRSKGVKPNVVTYTTLIDGLCKAGKVDEALELFDEMKERGIKPDVVTYTTLIDGLCKAGKVDEALELFDEMKERGIKPDVVTYNTLIDGLCKAGRLDEAEELLEEMEEKGIKPDVVTYTTLIDGLCKAGKVDEALELFDEMKERGIKPDVVTYTTLIDGLCKAGDVDEALELFKEMRSKGVKPNVVTYNTLIDGLCKSGKIEEALKLFKEMEEKGITPSVVTYTTLIDG…	ATGGGAAACTCCGTGGTCACATACACCACCCTGATCGACGGCCTGTGCAAGGCCGGCAAGGTGGACGAAGCCCTGGAGCTGTTCGACGAGATGAAGGAGAGGGGCATCAAGCCCGACGTGGTCACATACAACACCCTGATCGACGGCCTGTGCAAGGCCGGCAGACTGGATGAGGCCGAGGAGCTGCTGGAGGAGATGGAGGAGAAGGGCATCAAGCCCGACGTGGTCACATACACCACCCTGATCGACGGCCTGTGCAAGGCCGGCAAAGTGGACGAGGCCCTGGAGCTGTTCGACGAGATGAAGGAGAGGGGCATCAAGCCCGACGTGGTCACATACACCACACTGATCGACGGACTGTGTAAAGCCGGCGACGTGGACGAAGCCCTCGAGCTGTTC…
PPR2.0	t26	CGGGCCUCCGGUGUUCUG	MGNSVVTYNTLIDGLCKSGKIEEALKLFKEMEEKGITPSVVTYTTLIDGLCKAGKVDEALELFDEMKERGIKPDVVTYTTLIDGLCKAGKVDEALELFDEMKERGIKPDVVTYTTLIDGLCKAGKVDEALELFDEMKERGIKPDVVTYNTLIDGLCKSGKIEEALKLFKEMEEKGITPSVVTYNTLIDGLCKSGKIEEALKLFKEMEEKGITPSVVTYNTLIDGLCKAGRLDEAEELLEEMEEKGIKPDVVTYNTLIDGLCKSGKIEEALKLFKEMEEKGITPSVVTYNTLIDGLCKSGKIEEALKLFKEMEEKGITPSVVTYTTLIDGLCKAGKVDEALELFDEMKERGIKPDVVTYTTLIDGLCKAGKVDEALELFDEMKERGIKPDVVTYNTLIDG…	ATGGGAAACTCCGTGGTCACATACAACACCCTGATCGACGGCCTGTGCAAGAGCGGCAAGATCGAGGAGGCCCTGAAGCTGTTCAAGGAGATGGAGGAGAAGGGCATCACCCCCAGCGTGGTCACATACACCACCCTGATCGACGGCCTGTGCAAGGCCGGCAAGGTGGATGAGGCCCTGGAGCTGTTCGACGAGATGAAGGAGAGGGGCATCAAGCCCGACGTGGTCACATACACCACCCTGATCGACGGCCTGTGCAAGGCCGGCAAAGTGGACGAGGCCCTGGAGCTGTTCGACGAGATGAAGGAGAGGGGCATCAAGCCCGACGTGGTCACATACACCACCCTGATCGACGGCCTGTGCAAGGCCGGCAAGGTGGACGAAGCCCTGGAGCTGTTC…
PPR2.0	t27	CUUAUCAGACUGAUGUUG	MGNSVVTYNTLIDGLCKSGKIEEALKLFKEMEEKGITPSVVTYNTLIDGLCKAGRLDEAEELLEEMEEKGIKPDVVTYNTLIDGLCKAGRLDEAEELLEEMEEKGIKPDVVTYTTLIDGLCKAGDVDEALELFKEMRSKGVKPNVVTYNTLIDGLCKAGRLDEAEELLEEMEEKGIKPDVVTYNTLIDGLCKSGKIEEALKLFKEMEEKGITPSVVTYTTLIDGLCKAGDVDEALELFKEMRSKGVKPNVVTYTTLIDGLCKAGKVDEALELFDEMKERGIKPDVVTYTTLIDGLCKAGDVDEALELFKEMRSKGVKPNVVTYNTLIDGLCKSGKIEEALKLFKEMEEKGITPSVVTYNTLIDGLCKAGRLDEAEELLEEMEEKGIKPDVVTYTTLIDG…	ATGGGAAACTCCGTGGTCACATACAACACCCTGATCGACGGCCTGTGCAAGAGCGGCAAGATCGAGGAGGCCCTGAAGCTGTTCAAGGAGATGGAGGAGAAGGGCATCACCCCCAGCGTGGTCACATACAACACCCTGATCGACGGCCTGTGCAAGGCCGGCAGACTGGATGAGGCCGAGGAGCTGCTGGAGGAGATGGAGGAGAAGGGCATCAAGCCCGACGTGGTGACATACAACACCCTGATCGACGGCCTGTGCAAGGCCGGCAGACTGGATGAGGCCGAGGAGCTGCTGGAGGAGATGGAGGAGAAGGGCATCAAGCCCGACGTGGTCACATACACCACACTGATCGACGGACTGTGTAAAGCCGGCGACGTGGACGAAGCCCTCGAGCTGTTC…
PPR2.0	t28	ACGUGGAUGAAGUUGGUG	MGNSVVTYTTLIDGLCKAGDVDEALELFKEMRSKGVKPNVVTYNTLIDGLCKSGKIEEALKLFKEMEEKGITPSVVTYTTLIDGLCKAGKVDEALELFDEMKERGIKPDVVTYNTLIDGLCKAGRLDEAEELLEEMEEKGIKPDVVTYTTLIDGLCKAGKVDEALELFDEMKERGIKPDVVTYTTLIDGLCKAGKVDEALELFDEMKERGIKPDVVTYTTLIDGLCKAGDVDEALELFKEMRSKGVKPNVVTYNTLIDGLCKAGRLDEAEELLEEMEEKGIKPDVVTYTTLIDGLCKAGKVDEALELFDEMKERGIKPDVVTYTTLIDGLCKAGDVDEALELFKEMRSKGVKPNVVTYTTLIDGLCKAGDVDEALELFKEMRSKGVKPNVVTYTTLIDG…	ATGGGAAACTCCGTGGTCACATACACCACACTGATCGACGGACTGTGTAAAGCCGGCGACGTGGACGAAGCCCTCGAGCTGTTCAAAGAGATGCGGAGCAAGGGCGTGAAGCCCAACGTGGTCACATACAACACCCTGATCGACGGCCTGTGCAAGAGCGGCAAGATCGAGGAGGCCCTGAAGCTGTTCAAGGAGATGGAGGAGAAGGGCATCACCCCCAGCGTGGTGACATACACCACCCTGATCGACGGCCTGTGCAAGGCCGGCAAAGTGGACGAGGCCCTGGAGCTGTTCGACGAGATGAAGGAGAGGGGCATCAAGCCCGACGTGGTCACATACAACACCCTGATCGACGGCCTGTGCAAGGCCGGCAGACTGGATGAGGCCGAGGAGCTGCTG…
PPR2.0	t29	AGCUUAUCAGACUGAUGU	MGNSVVTYTTLIDGLCKAGDVDEALELFKEMRSKGVKPNVVTYTTLIDGLCKAGKVDEALELFDEMKERGIKPDVVTYNTLIDGLCKSGKIEEALKLFKEMEEKGITPSVVTYNTLIDGLCKAGRLDEAEELLEEMEEKGIKPDVVTYNTLIDGLCKAGRLDEAEELLEEMEEKGIKPDVVTYTTLIDGLCKAGDVDEALELFKEMRSKGVKPNVVTYNTLIDGLCKAGRLDEAEELLEEMEEKGIKPDVVTYNTLIDGLCKSGKIEEALKLFKEMEEKGITPSVVTYTTLIDGLCKAGDVDEALELFKEMRSKGVKPNVVTYTTLIDGLCKAGKVDEALELFDEMKERGIKPDVVTYTTLIDGLCKAGDVDEALELFKEMRSKGVKPNVVTYNTLIDG…	ATGGGAAACTCCGTGGTCACATACACCACACTGATCGACGGACTGTGTAAAGCCGGCGACGTGGACGAAGCCCTCGAGCTGTTCAAAGAGATGCGGAGCAAGGGCGTGAAGCCCAACGTGGTCACATACACCACCCTGATCGACGGCCTGTGCAAGGCCGGCAAGGTGGATGAGGCCCTGGAGCTGTTCGACGAGATGAAGGAGAGGGGCATCAAGCCCGACGTGGTGACATACAACACCCTGATCGACGGCCTGTGCAAGAGCGGCAAGATCGAGGAGGCCCTGAAGCTGTTCAAGGAGATGGAGGAGAAGGGCATCACCCCCAGCGTGGTCACATACAACACCCTGATCGACGGCCTGTGCAAGGCCGGCAGACTGGATGAGGCCGAGGAGCTGCTG…
PPR2.0	t30	GCUUAUCAGACUGAUGUU	MGNSVVTYTTLIDGLCKAGKVDEALELFDEMKERGIKPDVVTYNTLIDGLCKSGKIEEALKLFKEMEEKGITPSVVTYNTLIDGLCKAGRLDEAEELLEEMEEKGIKPDVVTYNTLIDGLCKAGRLDEAEELLEEMEEKGIKPDVVTYTTLIDGLCKAGDVDEALELFKEMRSKGVKPNVVTYNTLIDGLCKAGRLDEAEELLEEMEEKGIKPDVVTYNTLIDGLCKSGKIEEALKLFKEMEEKGITPSVVTYTTLIDGLCKAGDVDEALELFKEMRSKGVKPNVVTYTTLIDGLCKAGKVDEALELFDEMKERGIKPDVVTYTTLIDGLCKAGDVDEALELFKEMRSKGVKPNVVTYNTLIDGLCKSGKIEEALKLFKEMEEKGITPSVVTYNTLIDG…	ATGGGAAACTCCGTGGTCACATACACCACCCTGATCGACGGCCTGTGCAAGGCCGGCAAGGTGGATGAGGCCCTGGAGCTGTTCGACGAGATGAAGGAGAGGGGCATCAAGCCCGACGTGGTCACATACAACACCCTGATCGACGGCCTGTGCAAGAGCGGCAAGATCGAGGAGGCCCTGAAGCTGTTCAAGGAGATGGAGGAGAAGGGCATCACCCCCAGCGTGGTGACATACAACACCCTGATCGACGGCCTGTGCAAGGCCGGCAGACTGGATGAGGCCGAGGAGCTGCTGGAGGAGATGGAGGAGAAGGGCATCAAGCCCGACGTGGTCACATACAACACCCTGATCGACGGCCTGTGCAAGGCCGGCAGACTGGATGAGGCCGAGGAGCTGCTG…
PPR2.0	t31	CAUGUUCGAAUUCGUUUU	MGNSVVTYNTLIDGLCKSGKIEEALKLFKEMEEKGITPSVVTYTTLIDGLCKAGDVDEALELFKEMRSKGVKPNVVTYNTLIDGLCKAGRLDEAEELLEEMEEKGIKPDVVTYTTLIDGLCKAGKVDEALELFDEMKERGIKPDVVTYNTLIDGLCKAGRLDEAEELLEEMEEKGIKPDVVTYNTLIDGLCKAGRLDEAEELLEEMEEKGIKPDVVTYNTLIDGLCKSGKIEEALKLFKEMEEKGITPSVVTYTTLIDGLCKAGKVDEALELFDEMKERGIKPDVVTYTTLIDGLCKAGDVDEALELFKEMRSKGVKPNVVTYTTLIDGLCKAGDVDEALELFKEMRSKGVKPNVVTYNTLIDGLCKAGRLDEAEELLEEMEEKGIKPDVVTYNTLIDG…	ATGGGAAACTCCGTGGTCACATACAACACCCTGATCGACGGCCTGTGCAAGAGCGGCAAGATCGAGGAGGCCCTGAAGCTGTTCAAGGAGATGGAGGAGAAGGGCATCACCCCCAGCGTGGTCACATACACCACACTGATCGACGGACTGTGTAAAGCCGGCGACGTGGACGAAGCCCTCGAGCTGTTCAAAGAGATGCGGAGCAAGGGCGTGAAGCCCAACGTGGTCACATACAACACCCTGATCGACGGCCTGTGCAAGGCCGGCAGACTGGATGAGGCCGAGGAGCTGCTGGAGGAGATGGAGGAGAAGGGCATCAAGCCCGACGTGGTCACATACACCACCCTGATCGACGGCCTGTGCAAGGCCGGCAAGGTGGACGAAGCCCTGGAGCTGTTC…
PPR2.0	t32	UGCUGGGCAAGGUGAACG	MGNSVVTYNTLIDGLCKAGRLDEAEELLEEMEEKGIKPDVVTYTTLIDGLCKAGKVDEALELFDEMKERGIKPDVVTYNTLIDGLCKSGKIEEALKLFKEMEEKGITPSVVTYNTLIDGLCKAGRLDEAEELLEEMEEKGIKPDVVTYTTLIDGLCKAGKVDEALELFDEMKERGIKPDVVTYTTLIDGLCKAGKVDEALELFDEMKERGIKPDVVTYTTLIDGLCKAGKVDEALELFDEMKERGIKPDVVTYNTLIDGLCKSGKIEEALKLFKEMEEKGITPSVVTYTTLIDGLCKAGDVDEALELFKEMRSKGVKPNVVTYTTLIDGLCKAGDVDEALELFKEMRSKGVKPNVVTYTTLIDGLCKAGKVDEALELFDEMKERGIKPDVVTYTTLIDG…	ATGGGAAACTCCGTGGTCACATACAACACCCTGATCGACGGCCTGTGCAAGGCCGGCAGACTGGATGAGGCCGAGGAGCTGCTGGAGGAGATGGAGGAGAAGGGCATCAAGCCCGACGTGGTCACATACACCACCCTGATCGACGGCCTGTGCAAGGCCGGCAAGGTGGATGAGGCCCTGGAGCTGTTCGACGAGATGAAGGAGAGGGGCATCAAGCCCGACGTGGTGACATACAACACCCTGATCGACGGCCTGTGCAAGAGCGGCAAGATCGAGGAGGCCCTGAAGCTGTTCAAGGAGATGGAGGAGAAGGGCATCACCCCCAGCGTGGTCACATACAACACCCTGATCGACGGCCTGTGCAAGGCCGGCAGACTGGATGAGGCCGAGGAGCTGCTG…
PPR2.0	t33	UAGCUUAUCAGACUGAUG	MGNSVVTYNTLIDGLCKAGRLDEAEELLEEMEEKGIKPDVVTYTTLIDGLCKAGDVDEALELFKEMRSKGVKPNVVTYTTLIDGLCKAGKVDEALELFDEMKERGIKPDVVTYNTLIDGLCKSGKIEEALKLFKEMEEKGITPSVVTYNTLIDGLCKAGRLDEAEELLEEMEEKGIKPDVVTYNTLIDGLCKAGRLDEAEELLEEMEEKGIKPDVVTYTTLIDGLCKAGDVDEALELFKEMRSKGVKPNVVTYNTLIDGLCKAGRLDEAEELLEEMEEKGIKPDVVTYNTLIDGLCKSGKIEEALKLFKEMEEKGITPSVVTYTTLIDGLCKAGDVDEALELFKEMRSKGVKPNVVTYTTLIDGLCKAGKVDEALELFDEMKERGIKPDVVTYTTLIDG…	ATGGGAAACTCCGTGGTCACATACAACACCCTGATCGACGGCCTGTGCAAGGCCGGCAGACTGGATGAGGCCGAGGAGCTGCTGGAGGAGATGGAGGAGAAGGGCATCAAGCCCGACGTGGTCACATACACCACACTGATCGACGGACTGTGTAAAGCCGGCGACGTGGACGAAGCCCTCGAGCTGTTCAAAGAGATGCGGAGCAAGGGCGTGAAGCCCAACGTGGTGACATACACCACCCTGATCGACGGCCTGTGCAAGGCCGGCAAAGTGGACGAGGCCCTGGAGCTGTTCGACGAGATGAAGGAGAGGGGCATCAAGCCCGACGTGGTCACATACAACACCCTGATCGACGGCCTGTGCAAGAGCGGCAAGATCGAGGAGGCCCTGAAGCTGTTC…
PPR2.0	t34	UUUUAUUGUGCUAUGGCA	MGNSVVTYNTLIDGLCKAGRLDEAEELLEEMEEKGIKPDVVTYNTLIDGLCKAGRLDEAEELLEEMEEKGIKPDVVTYNTLIDGLCKAGRLDEAEELLEEMEEKGIKPDVVTYNTLIDGLCKAGRLDEAEELLEEMEEKGIKPDVVTYTTLIDGLCKAGDVDEALELFKEMRSKGVKPNVVTYNTLIDGLCKAGRLDEAEELLEEMEEKGIKPDVVTYNTLIDGLCKAGRLDEAEELLEEMEEKGIKPDVVTYTTLIDGLCKAGKVDEALELFDEMKERGIKPDVVTYNTLIDGLCKAGRLDEAEELLEEMEEKGIKPDVVTYTTLIDGLCKAGKVDEALELFDEMKERGIKPDVVTYNTLIDGLCKSGKIEEALKLFKEMEEKGITPSVVTYNTLIDG…	ATGGGAAACTCCGTGGTCACATACAACACCCTGATCGACGGCCTGTGCAAGGCCGGCAGACTGGACGAAGCCGAGGAGCTGCTGGAGGAGATGGAGGAGAAGGGCATCAAGCCCGACGTGGTCACATACAACACCCTGATCGACGGCCTGTGCAAGGCCGGCAGACTGGATGAGGCCGAGGAGCTGCTGGAGGAGATGGAGGAGAAGGGCATCAAGCCCGACGTGGTCACATACAACACCCTGATCGACGGCCTGTGCAAGGCCGGCAGACTGGATGAGGCCGAGGAGCTGCTGGAGGAGATGGAGGAGAAGGGCATCAAGCCCGACGTGGTCACATACAACACCCTGATCGACGGCCTGTGCAAGGCCGGCAGACTGGACGAGGCCGAAGAGCTGCTG…
PPR2.0	t35	UCCUCACCGGUGACUGGU	MGNSVVTYNTLIDGLCKAGRLDEAEELLEEMEEKGIKPDVVTYNTLIDGLCKSGKIEEALKLFKEMEEKGITPSVVTYNTLIDGLCKSGKIEEALKLFKEMEEKGITPSVVTYNTLIDGLCKAGRLDEAEELLEEMEEKGIKPDVVTYNTLIDGLCKSGKIEEALKLFKEMEEKGITPSVVTYTTLIDGLCKAGDVDEALELFKEMRSKGVKPNVVTYNTLIDGLCKSGKIEEALKLFKEMEEKGITPSVVTYNTLIDGLCKSGKIEEALKLFKEMEEKGITPSVVTYTTLIDGLCKAGKVDEALELFDEMKERGIKPDVVTYTTLIDGLCKAGKVDEALELFDEMKERGIKPDVVTYNTLIDGLCKAGRLDEAEELLEEMEEKGIKPDVVTYTTLIDG…	ATGGGAAACTCCGTGGTCACATACAACACCCTGATCGACGGCCTGTGCAAGGCCGGCAGACTGGACGAAGCCGAGGAGCTGCTGGAGGAGATGGAGGAGAAGGGCATCAAGCCCGACGTGGTCACATACAACACCCTGATCGACGGCCTGTGCAAGAGCGGCAAGATCGAGGAGGCCCTGAAGCTGTTCAAGGAGATGGAGGAGAAGGGCATCACCCCCAGCGTGGTCACATACAACACCCTGATCGACGGCCTGTGCAAGAGCGGCAAGATCGAGGAGGCCCTGAAGCTGTTCAAGGAGATGGAGGAGAAGGGCATCACCCCCAGCGTGGTCACATACAACACCCTGATCGACGGCCTGTGCAAGGCCGGCAGACTGGACGAGGCCGAAGAGCTGCTG…
PPR2.0	t36	UGUUUUGGUUAAUAAAAC	MGNSVVTYNTLIDGLCKAGRLDEAEELLEEMEEKGIKPDVVTYTTLIDGLCKAGKVDEALELFDEMKERGIKPDVVTYNTLIDGLCKAGRLDEAEELLEEMEEKGIKPDVVTYNTLIDGLCKAGRLDEAEELLEEMEEKGIKPDVVTYNTLIDGLCKAGRLDEAEELLEEMEEKGIKPDVVTYNTLIDGLCKAGRLDEAEELLEEMEEKGIKPDVVTYTTLIDGLCKAGKVDEALELFDEMKERGIKPDVVTYTTLIDGLCKAGKVDEALELFDEMKERGIKPDVVTYNTLIDGLCKAGRLDEAEELLEEMEEKGIKPDVVTYNTLIDGLCKAGRLDEAEELLEEMEEKGIKPDVVTYTTLIDGLCKAGDVDEALELFKEMRSKGVKPNVVTYTTLIDG…	ATGGGAAACTCCGTGGTCACATACAACACCCTGATCGACGGCCTGTGCAAGGCCGGCAGACTGGACGAAGCCGAGGAGCTGCTGGAGGAGATGGAGGAGAAGGGCATCAAGCCCGACGTGGTCACATACACCACCCTGATCGACGGCCTGTGCAAGGCCGGCAAGGTGGATGAGGCCCTGGAGCTGTTCGACGAGATGAAGGAGAGGGGCATCAAGCCCGACGTGGTCACATACAACACCCTGATCGACGGCCTGTGCAAGGCCGGCAGACTGGATGAGGCCGAGGAGCTGCTGGAGGAGATGGAGGAGAAGGGCATCAAGCCCGACGTGGTCACATACAACACCCTGATCGACGGCCTGTGCAAGGCCGGCAGACTGGACGAGGCCGAAGAGCTGCTG…
PPR2.0	t37	CCUGUUAUGUGUGUGAUU	MGNSVVTYNTLIDGLCKSGKIEEALKLFKEMEEKGITPSVVTYNTLIDGLCKSGKIEEALKLFKEMEEKGITPSVVTYNTLIDGLCKAGRLDEAEELLEEMEEKGIKPDVVTYTTLIDGLCKAGKVDEALELFDEMKERGIKPDVVTYNTLIDGLCKAGRLDEAEELLEEMEEKGIKPDVVTYNTLIDGLCKAGRLDEAEELLEEMEEKGIKPDVVTYTTLIDGLCKAGDVDEALELFKEMRSKGVKPNVVTYNTLIDGLCKAGRLDEAEELLEEMEEKGIKPDVVTYTTLIDGLCKAGKVDEALELFDEMKERGIKPDVVTYNTLIDGLCKAGRLDEAEELLEEMEEKGIKPDVVTYTTLIDGLCKAGKVDEALELFDEMKERGIKPDVVTYNTLIDG…	ATGGGAAACTCCGTGGTCACATACAACACCCTGATCGACGGCCTGTGCAAGAGCGGCAAGATCGAGGAGGCCCTGAAGCTGTTCAAGGAGATGGAGGAGAAGGGCATCACCCCCAGCGTGGTCACATACAACACCCTGATCGACGGCCTGTGCAAGAGCGGCAAGATCGAGGAGGCCCTGAAGCTGTTCAAGGAGATGGAGGAGAAGGGCATCACCCCCAGCGTGGTGACATACAACACCCTGATCGACGGCCTGTGCAAGGCCGGCAGACTGGATGAGGCCGAGGAGCTGCTGGAGGAGATGGAGGAGAAGGGCATCAAGCCCGACGTGGTCACATACACCACCCTGATCGACGGCCTGTGCAAGGCCGGCAAGGTGGATGAGGCCCTGGAGCTGTTC…
PPR2.0	t38	CUGAGAGUUGGCAUGAAU	MGNSVVTYNTLIDGLCKSGKIEEALKLFKEMEEKGITPSVVTYNTLIDGLCKAGRLDEAEELLEEMEEKGIKPDVVTYTTLIDGLCKAGKVDEALELFDEMKERGIKPDVVTYTTLIDGLCKAGDVDEALELFKEMRSKGVKPNVVTYTTLIDGLCKAGKVDEALELFDEMKERGIKPDVVTYTTLIDGLCKAGDVDEALELFKEMRSKGVKPNVVTYTTLIDGLCKAGKVDEALELFDEMKERGIKPDVVTYNTLIDGLCKAGRLDEAEELLEEMEEKGIKPDVVTYNTLIDGLCKAGRLDEAEELLEEMEEKGIKPDVVTYTTLIDGLCKAGKVDEALELFDEMKERGIKPDVVTYTTLIDGLCKAGKVDEALELFDEMKERGIKPDVVTYNTLIDG…	ATGGGAAACTCCGTGGTCACATACAACACCCTGATCGACGGCCTGTGCAAGAGCGGCAAGATCGAGGAGGCCCTGAAGCTGTTCAAGGAGATGGAGGAGAAGGGCATCACCCCCAGCGTGGTCACATACAACACCCTGATCGACGGCCTGTGCAAGGCCGGCAGACTGGATGAGGCCGAGGAGCTGCTGGAGGAGATGGAGGAGAAGGGCATCAAGCCCGACGTGGTGACATACACCACCCTGATCGACGGCCTGTGCAAGGCCGGCAAAGTGGACGAGGCCCTGGAGCTGTTCGACGAGATGAAGGAGAGGGGCATCAAGCCCGACGTGGTCACATACACCACACTGATCGACGGACTGTGTAAAGCCGGCGACGTGGACGAAGCCCTCGAGCTGTTC…
PPR2.0	t39	CAACCAUGCAUCUUGGAA	MGNSVVTYNTLIDGLCKSGKIEEALKLFKEMEEKGITPSVVTYTTLIDGLCKAGDVDEALELFKEMRSKGVKPNVVTYTTLIDGLCKAGDVDEALELFKEMRSKGVKPNVVTYNTLIDGLCKSGKIEEALKLFKEMEEKGITPSVVTYNTLIDGLCKSGKIEEALKLFKEMEEKGITPSVVTYTTLIDGLCKAGDVDEALELFKEMRSKGVKPNVVTYNTLIDGLCKAGRLDEAEELLEEMEEKGIKPDVVTYTTLIDGLCKAGKVDEALELFDEMKERGIKPDVVTYNTLIDGLCKSGKIEEALKLFKEMEEKGITPSVVTYTTLIDGLCKAGDVDEALELFKEMRSKGVKPNVVTYNTLIDGLCKAGRLDEAEELLEEMEEKGIKPDVVTYNTLIDG…	ATGGGAAACTCCGTGGTCACATACAACACCCTGATCGACGGCCTGTGCAAGAGCGGCAAGATCGAGGAGGCCCTGAAGCTGTTCAAGGAGATGGAGGAGAAGGGCATCACCCCCAGCGTGGTCACATACACCACACTGATCGACGGACTGTGTAAAGCCGGCGACGTGGACGAAGCCCTCGAGCTGTTCAAAGAGATGCGGAGCAAGGGCGTGAAGCCCAACGTGGTGACATACACCACACTGATCGACGGACTGTGTAAAGCCGGCGACGTGGACGAAGCCCTCGAGCTGTTCAAAGAGATGCGGAGCAAGGGCGTGAAGCCCAACGTGGTCACATACAACACCCTGATCGACGGCCTGTGCAAGAGCGGCAAGATCGAGGAGGCCCTGAAGCTGTTC…
PPR2.0	t40	GUGCUGAUUCCUAGACUU	MGNSVVTYTTLIDGLCKAGKVDEALELFDEMKERGIKPDVVTYNTLIDGLCKAGRLDEAEELLEEMEEKGIKPDVVTYTTLIDGLCKAGKVDEALELFDEMKERGIKPDVVTYNTLIDGLCKSGKIEEALKLFKEMEEKGITPSVVTYNTLIDGLCKAGRLDEAEELLEEMEEKGIKPDVVTYTTLIDGLCKAGKVDEALELFDEMKERGIKPDVVTYTTLIDGLCKAGDVDEALELFKEMRSKGVKPNVVTYNTLIDGLCKAGRLDEAEELLEEMEEKGIKPDVVTYNTLIDGLCKAGRLDEAEELLEEMEEKGIKPDVVTYNTLIDGLCKSGKIEEALKLFKEMEEKGITPSVVTYNTLIDGLCKSGKIEEALKLFKEMEEKGITPSVVTYNTLIDG…	ATGGGAAACTCCGTGGTCACATACACCACCCTGATCGACGGCCTGTGCAAGGCCGGCAAGGTGGATGAGGCCCTGGAGCTGTTCGACGAGATGAAGGAGAGGGGCATCAAGCCCGACGTGGTCACATACAACACCCTGATCGACGGCCTGTGCAAGGCCGGCAGACTGGATGAGGCCGAGGAGCTGCTGGAGGAGATGGAGGAGAAGGGCATCAAGCCCGACGTGGTGACATACACCACCCTGATCGACGGCCTGTGCAAGGCCGGCAAAGTGGACGAGGCCCTGGAGCTGTTCGACGAGATGAAGGAGAGGGGCATCAAGCCCGACGTGGTCACATACAACACCCTGATCGACGGCCTGTGCAAGAGCGGCAAGATCGAGGAGGCCCTGAAGCTGTTC…
PPR2.0	t41	CGCUGAGCUGCUGCCUGG	MGNSVVTYNTLIDGLCKSGKIEEALKLFKEMEEKGITPSVVTYTTLIDGLCKAGKVDEALELFDEMKERGIKPDVVTYNTLIDGLCKSGKIEEALKLFKEMEEKGITPSVVTYNTLIDGLCKAGRLDEAEELLEEMEEKGIKPDVVTYTTLIDGLCKAGKVDEALELFDEMKERGIKPDVVTYTTLIDGLCKAGDVDEALELFKEMRSKGVKPNVVTYTTLIDGLCKAGKVDEALELFDEMKERGIKPDVVTYNTLIDGLCKSGKIEEALKLFKEMEEKGITPSVVTYNTLIDGLCKAGRLDEAEELLEEMEEKGIKPDVVTYTTLIDGLCKAGKVDEALELFDEMKERGIKPDVVTYNTLIDGLCKSGKIEEALKLFKEMEEKGITPSVVTYNTLIDG…	ATGGGAAACTCCGTGGTCACATACAACACCCTGATCGACGGCCTGTGCAAGAGCGGCAAGATCGAGGAGGCCCTGAAGCTGTTCAAGGAGATGGAGGAGAAGGGCATCACCCCCAGCGTGGTCACATACACCACCCTGATCGACGGCCTGTGCAAGGCCGGCAAGGTGGATGAGGCCCTGGAGCTGTTCGACGAGATGAAGGAGAGGGGCATCAAGCCCGACGTGGTCACATACAACACCCTGATCGACGGCCTGTGCAAGAGCGGCAAGATCGAGGAGGCCCTGAAGCTGTTCAAGGAGATGGAGGAGAAGGGCATCACCCCCAGCGTGGTCACATACAACACCCTGATCGACGGCCTGTGCAAGGCCGGCAGACTGGACGAGGCCGAAGAGCTGCTG…
PPR2.0	t42	UGUGCUAUGGCAAAUCUG	MGNSVVTYNTLIDGLCKAGRLDEAEELLEEMEEKGIKPDVVTYTTLIDGLCKAGKVDEALELFDEMKERGIKPDVVTYNTLIDGLCKAGRLDEAEELLEEMEEKGIKPDVVTYTTLIDGLCKAGKVDEALELFDEMKERGIKPDVVTYNTLIDGLCKSGKIEEALKLFKEMEEKGITPSVVTYNTLIDGLCKAGRLDEAEELLEEMEEKGIKPDVVTYTTLIDGLCKAGDVDEALELFKEMRSKGVKPNVVTYNTLIDGLCKAGRLDEAEELLEEMEEKGIKPDVVTYTTLIDGLCKAGKVDEALELFDEMKERGIKPDVVTYTTLIDGLCKAGKVDEALELFDEMKERGIKPDVVTYNTLIDGLCKSGKIEEALKLFKEMEEKGITPSVVTYTTLIDG…	ATGGGAAACTCCGTGGTCACATACAACACCCTGATCGACGGCCTGTGCAAGGCCGGCAGACTGGACGAAGCCGAGGAGCTGCTGGAGGAGATGGAGGAGAAGGGCATCAAGCCCGACGTGGTCACATACACCACCCTGATCGACGGCCTGTGCAAGGCCGGCAAGGTGGATGAGGCCCTGGAGCTGTTCGACGAGATGAAGGAGAGGGGCATCAAGCCCGACGTGGTCACATACAACACCCTGATCGACGGCCTGTGCAAGGCCGGCAGACTGGATGAGGCCGAGGAGCTGCTGGAGGAGATGGAGGAGAAGGGCATCAAGCCCGACGTGGTCACATACACCACCCTGATCGACGGCCTGTGCAAGGCCGGCAAGGTGGACGAAGCCCTGGAGCTGTTC…
PPR2.0	t43	UUGUUUGCUUUGCUAAAG	MGNSVVTYNTLIDGLCKAGRLDEAEELLEEMEEKGIKPDVVTYNTLIDGLCKAGRLDEAEELLEEMEEKGIKPDVVTYTTLIDGLCKAGKVDEALELFDEMKERGIKPDVVTYNTLIDGLCKAGRLDEAEELLEEMEEKGIKPDVVTYNTLIDGLCKAGRLDEAEELLEEMEEKGIKPDVVTYNTLIDGLCKAGRLDEAEELLEEMEEKGIKPDVVTYTTLIDGLCKAGKVDEALELFDEMKERGIKPDVVTYNTLIDGLCKSGKIEEALKLFKEMEEKGITPSVVTYNTLIDGLCKAGRLDEAEELLEEMEEKGIKPDVVTYNTLIDGLCKAGRLDEAEELLEEMEEKGIKPDVVTYNTLIDGLCKAGRLDEAEELLEEMEEKGIKPDVVTYTTLIDG…	ATGGGAAACTCCGTGGTCACATACAACACCCTGATCGACGGCCTGTGCAAGGCCGGCAGACTGGACGAAGCCGAGGAGCTGCTGGAGGAGATGGAGGAGAAGGGCATCAAGCCCGACGTGGTCACATACAACACCCTGATCGACGGCCTGTGCAAGGCCGGCAGACTGGATGAGGCCGAGGAGCTGCTGGAGGAGATGGAGGAGAAGGGCATCAAGCCCGACGTGGTCACATACACCACCCTGATCGACGGCCTGTGCAAGGCCGGCAAAGTGGACGAGGCCCTGGAGCTGTTCGACGAGATGAAGGAGAGGGGCATCAAGCCCGACGTGGTCACATACAACACCCTGATCGACGGCCTGTGCAAGGCCGGCAGACTGGACGAGGCCGAAGAGCTGCTG…
PPR2.0	t44	ACGUCCCGGGAGGCGGCA	MGNSVVTYTTLIDGLCKAGDVDEALELFKEMRSKGVKPNVVTYNTLIDGLCKSGKIEEALKLFKEMEEKGITPSVVTYTTLIDGLCKAGKVDEALELFDEMKERGIKPDVVTYNTLIDGLCKAGRLDEAEELLEEMEEKGIKPDVVTYNTLIDGLCKSGKIEEALKLFKEMEEKGITPSVVTYNTLIDGLCKSGKIEEALKLFKEMEEKGITPSVVTYNTLIDGLCKSGKIEEALKLFKEMEEKGITPSVVTYTTLIDGLCKAGKVDEALELFDEMKERGIKPDVVTYTTLIDGLCKAGKVDEALELFDEMKERGIKPDVVTYTTLIDGLCKAGKVDEALELFDEMKERGIKPDVVTYTTLIDGLCKAGDVDEALELFKEMRSKGVKPNVVTYTTLIDG…	ATGGGAAACTCCGTGGTCACATACACCACACTGATCGACGGACTGTGTAAAGCCGGCGACGTGGACGAAGCCCTCGAGCTGTTCAAAGAGATGCGGAGCAAGGGCGTGAAGCCCAACGTGGTCACATACAACACCCTGATCGACGGCCTGTGCAAGAGCGGCAAGATCGAGGAGGCCCTGAAGCTGTTCAAGGAGATGGAGGAGAAGGGCATCACCCCCAGCGTGGTGACATACACCACCCTGATCGACGGCCTGTGCAAGGCCGGCAAAGTGGACGAGGCCCTGGAGCTGTTCGACGAGATGAAGGAGAGGGGCATCAAGCCCGACGTGGTCACATACAACACCCTGATCGACGGCCTGTGCAAGGCCGGCAGACTGGATGAGGCCGAGGAGCTGCTG…
PPR2.0	t45	CGUGUGGAUCGGCGGCUC	MGNSVVTYNTLIDGLCKSGKIEEALKLFKEMEEKGITPSVVTYTTLIDGLCKAGKVDEALELFDEMKERGIKPDVVTYNTLIDGLCKAGRLDEAEELLEEMEEKGIKPDVVTYTTLIDGLCKAGKVDEALELFDEMKERGIKPDVVTYNTLIDGLCKAGRLDEAEELLEEMEEKGIKPDVVTYTTLIDGLCKAGKVDEALELFDEMKERGIKPDVVTYTTLIDGLCKAGKVDEALELFDEMKERGIKPDVVTYTTLIDGLCKAGDVDEALELFKEMRSKGVKPNVVTYNTLIDGLCKAGRLDEAEELLEEMEEKGIKPDVVTYNTLIDGLCKSGKIEEALKLFKEMEEKGITPSVVTYTTLIDGLCKAGKVDEALELFDEMKERGIKPDVVTYTTLIDG…	ATGGGAAACTCCGTGGTCACATACAACACCCTGATCGACGGCCTGTGCAAGAGCGGCAAGATCGAGGAGGCCCTGAAGCTGTTCAAGGAGATGGAGGAGAAGGGCATCACCCCCAGCGTGGTCACATACACCACCCTGATCGACGGCCTGTGCAAGGCCGGCAAGGTGGATGAGGCCCTGGAGCTGTTCGACGAGATGAAGGAGAGGGGCATCAAGCCCGACGTGGTCACATACAACACCCTGATCGACGGCCTGTGCAAGGCCGGCAGACTGGATGAGGCCGAGGAGCTGCTGGAGGAGATGGAGGAGAAGGGCATCAAGCCCGACGTGGTCACATACACCACCCTGATCGACGGCCTGTGCAAGGCCGGCAAGGTGGACGAAGCCCTGGAGCTGTTC…
PPR2.0	t46	UCCAGGCUGUGCUAUCCC	MGNSVVTYNTLIDGLCKAGRLDEAEELLEEMEEKGIKPDVVTYNTLIDGLCKSGKIEEALKLFKEMEEKGITPSVVTYNTLIDGLCKSGKIEEALKLFKEMEEKGITPSVVTYTTLIDGLCKAGDVDEALELFKEMRSKGVKPNVVTYTTLIDGLCKAGKVDEALELFDEMKERGIKPDVVTYTTLIDGLCKAGKVDEALELFDEMKERGIKPDVVTYNTLIDGLCKSGKIEEALKLFKEMEEKGITPSVVTYNTLIDGLCKAGRLDEAEELLEEMEEKGIKPDVVTYTTLIDGLCKAGKVDEALELFDEMKERGIKPDVVTYNTLIDGLCKAGRLDEAEELLEEMEEKGIKPDVVTYTTLIDGLCKAGKVDEALELFDEMKERGIKPDVVTYNTLIDG…	ATGGGAAACTCCGTGGTCACATACAACACCCTGATCGACGGCCTGTGCAAGGCCGGCAGACTGGACGAAGCCGAGGAGCTGCTGGAGGAGATGGAGGAGAAGGGCATCAAGCCCGACGTGGTCACATACAACACCCTGATCGACGGCCTGTGCAAGAGCGGCAAGATCGAGGAGGCCCTGAAGCTGTTCAAGGAGATGGAGGAGAAGGGCATCACCCCCAGCGTGGTCACATACAACACCCTGATCGACGGCCTGTGCAAGAGCGGCAAGATCGAGGAGGCCCTGAAGCTGTTCAAGGAGATGGAGGAGAAGGGCATCACCCCCAGCGTGGTCACATACACCACACTGATCGACGGACTGTGTAAAGCCGGCGACGTGGACGAAGCCCTCGAGCTGTTC…
PPR2.0	t47	UCAGGAUUUAAAAACUGG	MGNSVVTYNTLIDGLCKAGRLDEAEELLEEMEEKGIKPDVVTYNTLIDGLCKSGKIEEALKLFKEMEEKGITPSVVTYTTLIDGLCKAGDVDEALELFKEMRSKGVKPNVVTYTTLIDGLCKAGKVDEALELFDEMKERGIKPDVVTYTTLIDGLCKAGKVDEALELFDEMKERGIKPDVVTYTTLIDGLCKAGDVDEALELFKEMRSKGVKPNVVTYNTLIDGLCKAGRLDEAEELLEEMEEKGIKPDVVTYNTLIDGLCKAGRLDEAEELLEEMEEKGIKPDVVTYNTLIDGLCKAGRLDEAEELLEEMEEKGIKPDVVTYTTLIDGLCKAGDVDEALELFKEMRSKGVKPNVVTYTTLIDGLCKAGDVDEALELFKEMRSKGVKPNVVTYTTLIDG…	ATGGGAAACTCCGTGGTCACATACAACACCCTGATCGACGGCCTGTGCAAGGCCGGCAGACTGGACGAAGCCGAGGAGCTGCTGGAGGAGATGGAGGAGAAGGGCATCAAGCCCGACGTGGTCACATACAACACCCTGATCGACGGCCTGTGCAAGAGCGGCAAGATCGAGGAGGCCCTGAAGCTGTTCAAGGAGATGGAGGAGAAGGGCATCACCCCCAGCGTGGTCACATACACCACACTGATCGACGGACTGTGTAAAGCCGGCGACGTGGACGAAGCCCTCGAGCTGTTCAAAGAGATGCGGAGCAAGGGCGTGAAGCCCAACGTGGTCACATACACCACCCTGATCGACGGCCTGTGCAAGGCCGGCAAGGTGGACGAAGCCCTGGAGCTGTTC…
PPR2.0	t48	UCUAGAAUCCUAAAGGCA	MGNSVVTYNTLIDGLCKAGRLDEAEELLEEMEEKGIKPDVVTYNTLIDGLCKSGKIEEALKLFKEMEEKGITPSVVTYNTLIDGLCKAGRLDEAEELLEEMEEKGIKPDVVTYTTLIDGLCKAGDVDEALELFKEMRSKGVKPNVVTYTTLIDGLCKAGKVDEALELFDEMKERGIKPDVVTYTTLIDGLCKAGDVDEALELFKEMRSKGVKPNVVTYTTLIDGLCKAGDVDEALELFKEMRSKGVKPNVVTYNTLIDGLCKAGRLDEAEELLEEMEEKGIKPDVVTYNTLIDGLCKSGKIEEALKLFKEMEEKGITPSVVTYNTLIDGLCKSGKIEEALKLFKEMEEKGITPSVVTYNTLIDGLCKAGRLDEAEELLEEMEEKGIKPDVVTYTTLIDG…	ATGGGAAACTCCGTGGTCACATACAACACCCTGATCGACGGCCTGTGCAAGGCCGGCAGACTGGATGAGGCCGAGGAGCTGCTGGAGGAGATGGAGGAGAAGGGCATCAAGCCCGACGTGGTCACATACAACACCCTGATCGACGGCCTGTGCAAGAGCGGCAAGATCGAGGAGGCCCTGAAGCTGTTCAAGGAGATGGAGGAGAAGGGCATCACCCCCAGCGTGGTGACATACAACACCCTGATCGACGGCCTGTGCAAGGCCGGCAGACTGGATGAGGCCGAGGAGCTGCTGGAGGAGATGGAGGAGAAGGGCATCAAGCCCGACGTGGTCACATACACCACACTGATCGACGGACTGTGTAAAGCCGGCGACGTGGACGAAGCCCTCGAGCTGTTC…
PPR2.0	t49	UUGUGGCCUUUUUCUCCU	MGNSVVTYNTLIDGLCKAGRLDEAEELLEEMEEKGIKPDVVTYNTLIDGLCKAGRLDEAEELLEEMEEKGIKPDVVTYTTLIDGLCKAGKVDEALELFDEMKERGIKPDVVTYNTLIDGLCKAGRLDEAEELLEEMEEKGIKPDVVTYTTLIDGLCKAGKVDEALELFDEMKERGIKPDVVTYTTLIDGLCKAGKVDEALELFDEMKERGIKPDVVTYNTLIDGLCKSGKIEEALKLFKEMEEKGITPSVVTYNTLIDGLCKSGKIEEALKLFKEMEEKGITPSVVTYNTLIDGLCKAGRLDEAEELLEEMEEKGIKPDVVTYNTLIDGLCKAGRLDEAEELLEEMEEKGIKPDVVTYNTLIDGLCKAGRLDEAEELLEEMEEKGIKPDVVTYNTLIDG…	ATGGGAAACTCCGTGGTCACATACAACACCCTGATCGACGGCCTGTGCAAGGCCGGCAGACTGGACGAAGCCGAGGAGCTGCTGGAGGAGATGGAGGAGAAGGGCATCAAGCCCGACGTGGTCACATACAACACCCTGATCGACGGCCTGTGCAAGGCCGGCAGACTGGATGAGGCCGAGGAGCTGCTGGAGGAGATGGAGGAGAAGGGCATCAAGCCCGACGTGGTCACATACACCACCCTGATCGACGGCCTGTGCAAGGCCGGCAAAGTGGACGAGGCCCTGGAGCTGTTCGACGAGATGAAGGAGAGGGGCATCAAGCCCGACGTGGTCACATACAACACCCTGATCGACGGCCTGTGCAAGGCCGGCAGACTGGACGAGGCCGAAGAGCTGCTG…
PPR2.0	t50	UGGUGUAUCUUGUCUUUA	MGNSVVTYNTLIDGLCKAGRLDEAEELLEEMEEKGIKPDVVTYTTLIDGLCKAGKVDEALELFDEMKERGIKPDVVTYTTLIDGLCKAGKVDEALELFDEMKERGIKPDVVTYNTLIDGLCKAGRLDEAEELLEEMEEKGIKPDVVTYTTLIDGLCKAGKVDEALELFDEMKERGIKPDVVTYNTLIDGLCKAGRLDEAEELLEEMEEKGIKPDVVTYTTLIDGLCKAGDVDEALELFKEMRSKGVKPNVVTYNTLIDGLCKAGRLDEAEELLEEMEEKGIKPDVVTYNTLIDGLCKSGKIEEALKLFKEMEEKGITPSVVTYNTLIDGLCKAGRLDEAEELLEEMEEKGIKPDVVTYNTLIDGLCKAGRLDEAEELLEEMEEKGIKPDVVTYTTLIDG…	ATGGGAAACTCCGTGGTCACATACAACACCCTGATCGACGGCCTGTGCAAGGCCGGCAGACTGGACGAAGCCGAGGAGCTGCTGGAGGAGATGGAGGAGAAGGGCATCAAGCCCGACGTGGTCACATACACCACCCTGATCGACGGCCTGTGCAAGGCCGGCAAGGTGGATGAGGCCCTGGAGCTGTTCGACGAGATGAAGGAGAGGGGCATCAAGCCCGACGTGGTCACATACACCACCCTGATCGACGGCCTGTGCAAGGCCGGCAAAGTGGACGAGGCCCTGGAGCTGTTCGACGAGATGAAGGAGAGGGGCATCAAGCCCGACGTGGTCACATACAACACCCTGATCGACGGCCTGTGCAAGGCCGGCAGACTGGACGAGGCCGAAGAGCTGCTG…
PPR2.0	t51	GAUAUCGCCGCGCUCGUC	MGNSVVTYTTLIDGLCKAGKVDEALELFDEMKERGIKPDVVTYTTLIDGLCKAGDVDEALELFKEMRSKGVKPNVVTYNTLIDGLCKAGRLDEAEELLEEMEEKGIKPDVVTYTTLIDGLCKAGDVDEALELFKEMRSKGVKPNVVTYNTLIDGLCKAGRLDEAEELLEEMEEKGIKPDVVTYNTLIDGLCKSGKIEEALKLFKEMEEKGITPSVVTYTTLIDGLCKAGKVDEALELFDEMKERGIKPDVVTYNTLIDGLCKSGKIEEALKLFKEMEEKGITPSVVTYNTLIDGLCKSGKIEEALKLFKEMEEKGITPSVVTYTTLIDGLCKAGKVDEALELFDEMKERGIKPDVVTYNTLIDGLCKSGKIEEALKLFKEMEEKGITPSVVTYTTLIDG…	ATGGGAAACTCCGTGGTCACATACACCACCCTGATCGACGGCCTGTGCAAGGCCGGCAAGGTGGACGAAGCCCTGGAGCTGTTCGACGAGATGAAGGAGAGGGGCATCAAGCCCGACGTGGTCACATACACCACACTGATCGACGGACTGTGTAAAGCCGGCGACGTGGACGAAGCCCTCGAGCTGTTCAAAGAGATGCGGAGCAAGGGCGTGAAGCCCAACGTGGTCACATACAACACCCTGATCGACGGCCTGTGCAAGGCCGGCAGACTGGATGAGGCCGAGGAGCTGCTGGAGGAGATGGAGGAGAAGGGCATCAAGCCCGACGTGGTCACATACACCACACTGATCGACGGACTGTGTAAAGCCGGCGACGTGGACGAAGCCCTCGAGCTGTTC…
PPR2.0	t52	ACAACGGCUCCGGCAUGU	MGNSVVTYTTLIDGLCKAGDVDEALELFKEMRSKGVKPNVVTYNTLIDGLCKSGKIEEALKLFKEMEEKGITPSVVTYTTLIDGLCKAGDVDEALELFKEMRSKGVKPNVVTYTTLIDGLCKAGDVDEALELFKEMRSKGVKPNVVTYNTLIDGLCKSGKIEEALKLFKEMEEKGITPSVVTYTTLIDGLCKAGKVDEALELFDEMKERGIKPDVVTYTTLIDGLCKAGKVDEALELFDEMKERGIKPDVVTYNTLIDGLCKSGKIEEALKLFKEMEEKGITPSVVTYNTLIDGLCKAGRLDEAEELLEEMEEKGIKPDVVTYNTLIDGLCKSGKIEEALKLFKEMEEKGITPSVVTYNTLIDGLCKSGKIEEALKLFKEMEEKGITPSVVTYTTLIDG…	ATGGGAAACTCCGTGGTCACATACACCACACTGATCGACGGACTGTGTAAAGCCGGCGACGTGGACGAAGCCCTCGAGCTGTTCAAAGAGATGCGGAGCAAGGGCGTGAAGCCCAACGTGGTCACATACAACACCCTGATCGACGGCCTGTGCAAGAGCGGCAAGATCGAGGAGGCCCTGAAGCTGTTCAAGGAGATGGAGGAGAAGGGCATCACCCCCAGCGTGGTCACATACACCACACTGATCGACGGACTGTGTAAAGCCGGCGACGTGGACGAAGCCCTCGAGCTGTTCAAAGAGATGCGGAGCAAGGGCGTGAAGCCCAACGTGGTCACATACACCACACTGATCGACGGACTGTGTAAAGCCGGCGACGTGGACGAAGCCCTCGAGCTGTTC…
PPR2.0	t53	AGCCAUACUAUUUAUGUG	MGNSVVTYTTLIDGLCKAGDVDEALELFKEMRSKGVKPNVVTYTTLIDGLCKAGKVDEALELFDEMKERGIKPDVVTYNTLIDGLCKSGKIEEALKLFKEMEEKGITPSVVTYNTLIDGLCKSGKIEEALKLFKEMEEKGITPSVVTYTTLIDGLCKAGDVDEALELFKEMRSKGVKPNVVTYNTLIDGLCKAGRLDEAEELLEEMEEKGIKPDVVTYTTLIDGLCKAGDVDEALELFKEMRSKGVKPNVVTYNTLIDGLCKSGKIEEALKLFKEMEEKGITPSVVTYNTLIDGLCKAGRLDEAEELLEEMEEKGIKPDVVTYTTLIDGLCKAGDVDEALELFKEMRSKGVKPNVVTYNTLIDGLCKAGRLDEAEELLEEMEEKGIKPDVVTYNTLIDG…	ATGGGAAACTCCGTGGTCACATACACCACACTGATCGACGGACTGTGTAAAGCCGGCGACGTGGACGAAGCCCTCGAGCTGTTCAAAGAGATGCGGAGCAAGGGCGTGAAGCCCAACGTGGTCACATACACCACCCTGATCGACGGCCTGTGCAAGGCCGGCAAGGTGGATGAGGCCCTGGAGCTGTTCGACGAGATGAAGGAGAGGGGCATCAAGCCCGACGTGGTGACATACAACACCCTGATCGACGGCCTGTGCAAGAGCGGCAAGATCGAGGAGGCCCTGAAGCTGTTCAAGGAGATGGAGGAGAAGGGCATCACCCCCAGCGTGGTCACATACAACACCCTGATCGACGGCCTGTGCAAGAGCGGCAAGATCGAGGAGGCCCTGAAGCTGTTC…
PPR2.0	t54	UGAAAGCGAAAGUAAAGC	MGNSVVTYNTLIDGLCKAGRLDEAEELLEEMEEKGIKPDVVTYTTLIDGLCKAGKVDEALELFDEMKERGIKPDVVTYTTLIDGLCKAGDVDEALELFKEMRSKGVKPNVVTYTTLIDGLCKAGDVDEALELFKEMRSKGVKPNVVTYTTLIDGLCKAGDVDEALELFKEMRSKGVKPNVVTYTTLIDGLCKAGKVDEALELFDEMKERGIKPDVVTYNTLIDGLCKSGKIEEALKLFKEMEEKGITPSVVTYTTLIDGLCKAGKVDEALELFDEMKERGIKPDVVTYTTLIDGLCKAGDVDEALELFKEMRSKGVKPNVVTYTTLIDGLCKAGDVDEALELFKEMRSKGVKPNVVTYTTLIDGLCKAGDVDEALELFKEMRSKGVKPNVVTYTTLIDG…	ATGGGAAACTCCGTGGTCACATACAACACCCTGATCGACGGCCTGTGCAAGGCCGGCAGACTGGACGAAGCCGAGGAGCTGCTGGAGGAGATGGAGGAGAAGGGCATCAAGCCCGACGTGGTCACATACACCACCCTGATCGACGGCCTGTGCAAGGCCGGCAAGGTGGATGAGGCCCTGGAGCTGTTCGACGAGATGAAGGAGAGGGGCATCAAGCCCGACGTGGTCACATACACCACACTGATCGACGGACTGTGTAAAGCCGGCGACGTGGACGAAGCCCTCGAGCTGTTCAAAGAGATGCGGAGCAAGGGCGTGAAGCCCAACGTGGTCACATACACCACACTGATCGACGGACTGTGTAAAGCCGGCGACGTGGACGAAGCCCTCGAGCTGTTC…
PPR2.0	t55	CUGGAUCUUAGCAACGUC	MGNSVVTYNTLIDGLCKSGKIEEALKLFKEMEEKGITPSVVTYNTLIDGLCKAGRLDEAEELLEEMEEKGIKPDVVTYTTLIDGLCKAGKVDEALELFDEMKERGIKPDVVTYTTLIDGLCKAGKVDEALELFDEMKERGIKPDVVTYTTLIDGLCKAGDVDEALELFKEMRSKGVKPNVVTYNTLIDGLCKAGRLDEAEELLEEMEEKGIKPDVVTYNTLIDGLCKSGKIEEALKLFKEMEEKGITPSVVTYNTLIDGLCKAGRLDEAEELLEEMEEKGIKPDVVTYNTLIDGLCKAGRLDEAEELLEEMEEKGIKPDVVTYTTLIDGLCKAGDVDEALELFKEMRSKGVKPNVVTYTTLIDGLCKAGKVDEALELFDEMKERGIKPDVVTYNTLIDG…	ATGGGAAACTCCGTGGTCACATACAACACCCTGATCGACGGCCTGTGCAAGAGCGGCAAGATCGAGGAGGCCCTGAAGCTGTTCAAGGAGATGGAGGAGAAGGGCATCACCCCCAGCGTGGTCACATACAACACCCTGATCGACGGCCTGTGCAAGGCCGGCAGACTGGATGAGGCCGAGGAGCTGCTGGAGGAGATGGAGGAGAAGGGCATCAAGCCCGACGTGGTGACATACACCACCCTGATCGACGGCCTGTGCAAGGCCGGCAAAGTGGACGAGGCCCTGGAGCTGTTCGACGAGATGAAGGAGAGGGGCATCAAGCCCGACGTGGTCACATACACCACCCTGATCGACGGCCTGTGCAAGGCCGGCAAGGTGGATGAGGCCCTGGAGCTGTTC…
PPR2.0	t56	GUCUAUUUUCCCACCCUU	MGNSVVTYTTLIDGLCKAGKVDEALELFDEMKERGIKPDVVTYNTLIDGLCKAGRLDEAEELLEEMEEKGIKPDVVTYNTLIDGLCKSGKIEEALKLFKEMEEKGITPSVVTYNTLIDGLCKAGRLDEAEELLEEMEEKGIKPDVVTYTTLIDGLCKAGDVDEALELFKEMRSKGVKPNVVTYNTLIDGLCKAGRLDEAEELLEEMEEKGIKPDVVTYNTLIDGLCKAGRLDEAEELLEEMEEKGIKPDVVTYNTLIDGLCKAGRLDEAEELLEEMEEKGIKPDVVTYNTLIDGLCKAGRLDEAEELLEEMEEKGIKPDVVTYNTLIDGLCKSGKIEEALKLFKEMEEKGITPSVVTYNTLIDGLCKSGKIEEALKLFKEMEEKGITPSVVTYNTLIDG…	ATGGGAAACTCCGTGGTCACATACACCACCCTGATCGACGGCCTGTGCAAGGCCGGCAAGGTGGATGAGGCCCTGGAGCTGTTCGACGAGATGAAGGAGAGGGGCATCAAGCCCGACGTGGTCACATACAACACCCTGATCGACGGCCTGTGCAAGGCCGGCAGACTGGATGAGGCCGAGGAGCTGCTGGAGGAGATGGAGGAGAAGGGCATCAAGCCCGACGTGGTGACATACAACACCCTGATCGACGGCCTGTGCAAGAGCGGCAAGATCGAGGAGGCCCTGAAGCTGTTCAAGGAGATGGAGGAGAAGGGCATCACCCCCAGCGTGGTCACATACAACACCCTGATCGACGGCCTGTGCAAGGCCGGCAGACTGGATGAGGCCGAGGAGCTGCTG…
PPR2.0	t57	UUGGUAUCAAGGUUACAA	MGNSVVTYNTLIDGLCKAGRLDEAEELLEEMEEKGIKPDVVTYNTLIDGLCKAGRLDEAEELLEEMEEKGIKPDVVTYTTLIDGLCKAGKVDEALELFDEMKERGIKPDVVTYTTLIDGLCKAGKVDEALELFDEMKERGIKPDVVTYNTLIDGLCKAGRLDEAEELLEEMEEKGIKPDVVTYTTLIDGLCKAGDVDEALELFKEMRSKGVKPNVVTYNTLIDGLCKAGRLDEAEELLEEMEEKGIKPDVVTYNTLIDGLCKSGKIEEALKLFKEMEEKGITPSVVTYTTLIDGLCKAGDVDEALELFKEMRSKGVKPNVVTYTTLIDGLCKAGDVDEALELFKEMRSKGVKPNVVTYTTLIDGLCKAGKVDEALELFDEMKERGIKPDVVTYTTLIDG…	ATGGGAAACTCCGTGGTCACATACAACACCCTGATCGACGGCCTGTGCAAGGCCGGCAGACTGGATGAGGCCGAGGAGCTGCTGGAGGAGATGGAGGAGAAGGGCATCAAGCCCGACGTGGTCACATACAACACCCTGATCGACGGCCTGTGCAAGGCCGGCAGACTGGATGAGGCCGAGGAGCTGCTGGAGGAGATGGAGGAGAAGGGCATCAAGCCCGACGTGGTGACATACACCACCCTGATCGACGGCCTGTGCAAGGCCGGCAAAGTGGACGAGGCCCTGGAGCTGTTCGACGAGATGAAGGAGAGGGGCATCAAGCCCGACGTGGTCACATACACCACCCTGATCGACGGCCTGTGCAAGGCCGGCAAGGTGGATGAGGCCCTGGAGCTGTTC…
PPR2.0	t58	GCUCGUGGAGACCAUCUU	MGNSVVTYTTLIDGLCKAGKVDEALELFDEMKERGIKPDVVTYNTLIDGLCKSGKIEEALKLFKEMEEKGITPSVVTYNTLIDGLCKAGRLDEAEELLEEMEEKGIKPDVVTYNTLIDGLCKSGKIEEALKLFKEMEEKGITPSVVTYTTLIDGLCKAGKVDEALELFDEMKERGIKPDVVTYNTLIDGLCKAGRLDEAEELLEEMEEKGIKPDVVTYTTLIDGLCKAGKVDEALELFDEMKERGIKPDVVTYTTLIDGLCKAGKVDEALELFDEMKERGIKPDVVTYTTLIDGLCKAGDVDEALELFKEMRSKGVKPNVVTYTTLIDGLCKAGKVDEALELFDEMKERGIKPDVVTYTTLIDGLCKAGDVDEALELFKEMRSKGVKPNVVTYNTLIDG…	ATGGGAAACTCCGTGGTCACATACACCACCCTGATCGACGGCCTGTGCAAGGCCGGCAAGGTGGACGAAGCCCTGGAGCTGTTCGACGAGATGAAGGAGAGGGGCATCAAGCCCGACGTGGTCACATACAACACCCTGATCGACGGCCTGTGCAAGAGCGGCAAGATCGAGGAGGCCCTGAAGCTGTTCAAGGAGATGGAGGAGAAGGGCATCACCCCCAGCGTGGTCACATACAACACCCTGATCGACGGCCTGTGCAAGGCCGGCAGACTGGATGAGGCCGAGGAGCTGCTGGAGGAGATGGAGGAGAAGGGCATCAAGCCCGACGTGGTCACATACAACACCCTGATCGACGGCCTGTGCAAGAGCGGCAAGATCGAGGAGGCCCTGAAGCTGTTC…
PPR2.0	t59	GGAGCGAGCAUCCCCCAA	MGNSVVTYTTLIDGLCKAGKVDEALELFDEMKERGIKPDVVTYTTLIDGLCKAGKVDEALELFDEMKERGIKPDVVTYTTLIDGLCKAGDVDEALELFKEMRSKGVKPNVVTYTTLIDGLCKAGKVDEALELFDEMKERGIKPDVVTYNTLIDGLCKSGKIEEALKLFKEMEEKGITPSVVTYTTLIDGLCKAGKVDEALELFDEMKERGIKPDVVTYTTLIDGLCKAGDVDEALELFKEMRSKGVKPNVVTYTTLIDGLCKAGKVDEALELFDEMKERGIKPDVVTYNTLIDGLCKSGKIEEALKLFKEMEEKGITPSVVTYTTLIDGLCKAGDVDEALELFKEMRSKGVKPNVVTYNTLIDGLCKAGRLDEAEELLEEMEEKGIKPDVVTYNTLIDG…	ATGGGAAACTCCGTGGTCACATACACCACCCTGATCGACGGCCTGTGCAAGGCCGGCAAGGTGGACGAAGCCCTGGAGCTGTTCGACGAGATGAAGGAGAGGGGCATCAAGCCCGACGTGGTCACATACACCACCCTGATCGACGGCCTGTGCAAGGCCGGCAAGGTGGATGAGGCCCTGGAGCTGTTCGACGAGATGAAGGAGAGGGGCATCAAGCCCGACGTGGTCACATACACCACACTGATCGACGGACTGTGTAAAGCCGGCGACGTGGACGAAGCCCTCGAGCTGTTCAAAGAGATGCGGAGCAAGGGCGTGAAGCCCAACGTGGTCACATACACCACCCTGATCGACGGCCTGTGCAAGGCCGGCAAGGTGGACGAAGCCCTGGAGCTGTTC…
PPR2.0	t60	CUUUUUUCUGGCUACCAA	MGNSVVTYNTLIDGLCKSGKIEEALKLFKEMEEKGITPSVVTYNTLIDGLCKAGRLDEAEELLEEMEEKGIKPDVVTYNTLIDGLCKAGRLDEAEELLEEMEEKGIKPDVVTYNTLIDGLCKAGRLDEAEELLEEMEEKGIKPDVVTYNTLIDGLCKAGRLDEAEELLEEMEEKGIKPDVVTYNTLIDGLCKAGRLDEAEELLEEMEEKGIKPDVVTYNTLIDGLCKAGRLDEAEELLEEMEEKGIKPDVVTYNTLIDGLCKSGKIEEALKLFKEMEEKGITPSVVTYNTLIDGLCKAGRLDEAEELLEEMEEKGIKPDVVTYTTLIDGLCKAGKVDEALELFDEMKERGIKPDVVTYTTLIDGLCKAGKVDEALELFDEMKERGIKPDVVTYNTLIDG…	ATGGGAAACTCCGTGGTCACATACAACACCCTGATCGACGGCCTGTGCAAGAGCGGCAAGATCGAGGAGGCCCTGAAGCTGTTCAAGGAGATGGAGGAGAAGGGCATCACCCCCAGCGTGGTCACATACAACACCCTGATCGACGGCCTGTGCAAGGCCGGCAGACTGGATGAGGCCGAGGAGCTGCTGGAGGAGATGGAGGAGAAGGGCATCAAGCCCGACGTGGTGACATACAACACCCTGATCGACGGCCTGTGCAAGGCCGGCAGACTGGATGAGGCCGAGGAGCTGCTGGAGGAGATGGAGGAGAAGGGCATCAAGCCCGACGTGGTCACATACAACACCCTGATCGACGGCCTGTGCAAGGCCGGCAGACTGGATGAGGCCGAGGAGCTGCTG…
PPR2.0	t61	CUCCUCCUGAGCGCAAGU	MGNSVVTYNTLIDGLCKSGKIEEALKLFKEMEEKGITPSVVTYNTLIDGLCKAGRLDEAEELLEEMEEKGIKPDVVTYNTLIDGLCKSGKIEEALKLFKEMEEKGITPSVVTYNTLIDGLCKSGKIEEALKLFKEMEEKGITPSVVTYNTLIDGLCKAGRLDEAEELLEEMEEKGIKPDVVTYNTLIDGLCKSGKIEEALKLFKEMEEKGITPSVVTYNTLIDGLCKSGKIEEALKLFKEMEEKGITPSVVTYNTLIDGLCKAGRLDEAEELLEEMEEKGIKPDVVTYTTLIDGLCKAGKVDEALELFDEMKERGIKPDVVTYTTLIDGLCKAGDVDEALELFKEMRSKGVKPNVVTYTTLIDGLCKAGKVDEALELFDEMKERGIKPDVVTYNTLIDG…	ATGGGAAACTCCGTGGTCACATACAACACCCTGATCGACGGCCTGTGCAAGAGCGGCAAGATCGAGGAGGCCCTGAAGCTGTTCAAGGAGATGGAGGAGAAGGGCATCACCCCCAGCGTGGTCACATACAACACCCTGATCGACGGCCTGTGCAAGGCCGGCAGACTGGATGAGGCCGAGGAGCTGCTGGAGGAGATGGAGGAGAAGGGCATCAAGCCCGACGTGGTCACATACAACACCCTGATCGACGGCCTGTGCAAGAGCGGCAAGATCGAGGAGGCCCTGAAGCTGTTCAAGGAGATGGAGGAGAAGGGCATCACCCCCAGCGTGGTCACATACAACACCCTGATCGACGGCCTGTGCAAGAGCGGCAAGATCGAGGAGGCCCTGAAGCTGTTC…
PPR2.0	t62	CGCCUCUGGCCGUACCAC	MGNSVVTYNTLIDGLCKSGKIEEALKLFKEMEEKGITPSVVTYTTLIDGLCKAGKVDEALELFDEMKERGIKPDVVTYNTLIDGLCKSGKIEEALKLFKEMEEKGITPSVVTYNTLIDGLCKSGKIEEALKLFKEMEEKGITPSVVTYNTLIDGLCKAGRLDEAEELLEEMEEKGIKPDVVTYNTLIDGLCKSGKIEEALKLFKEMEEKGITPSVVTYNTLIDGLCKAGRLDEAEELLEEMEEKGIKPDVVTYTTLIDGLCKAGKVDEALELFDEMKERGIKPDVVTYTTLIDGLCKAGKVDEALELFDEMKERGIKPDVVTYNTLIDGLCKSGKIEEALKLFKEMEEKGITPSVVTYNTLIDGLCKSGKIEEALKLFKEMEEKGITPSVVTYTTLIDG…	ATGGGAAACTCCGTGGTCACATACAACACCCTGATCGACGGCCTGTGCAAGAGCGGCAAGATCGAGGAGGCCCTGAAGCTGTTCAAGGAGATGGAGGAGAAGGGCATCACCCCCAGCGTGGTCACATACACCACCCTGATCGACGGCCTGTGCAAGGCCGGCAAGGTGGATGAGGCCCTGGAGCTGTTCGACGAGATGAAGGAGAGGGGCATCAAGCCCGACGTGGTCACATACAACACCCTGATCGACGGCCTGTGCAAGAGCGGCAAGATCGAGGAGGCCCTGAAGCTGTTCAAGGAGATGGAGGAGAAGGGCATCACCCCCAGCGTGGTCACATACAACACCCTGATCGACGGCCTGTGCAAGAGCGGCAAGATCGAGGAGGCCCTGAAGCTGTTC…
PPR2.0	t63	GCAGCAGCAGCAGCAGCA	MGNSVVTYTTLIDGLCKAGKVDEALELFDEMKERGIKPDVVTYNTLIDGLCKSGKIEEALKLFKEMEEKGITPSVVTYTTLIDGLCKAGDVDEALELFKEMRSKGVKPNVVTYTTLIDGLCKAGKVDEALELFDEMKERGIKPDVVTYNTLIDGLCKSGKIEEALKLFKEMEEKGITPSVVTYTTLIDGLCKAGDVDEALELFKEMRSKGVKPNVVTYTTLIDGLCKAGKVDEALELFDEMKERGIKPDVVTYNTLIDGLCKSGKIEEALKLFKEMEEKGITPSVVTYTTLIDGLCKAGDVDEALELFKEMRSKGVKPNVVTYTTLIDGLCKAGKVDEALELFDEMKERGIKPDVVTYNTLIDGLCKSGKIEEALKLFKEMEEKGITPSVVTYTTLIDG…	ATGGGAAACTCCGTGGTCACATACACCACCCTGATCGACGGCCTGTGCAAGGCCGGCAAGGTGGATGAGGCCCTGGAGCTGTTCGACGAGATGAAGGAGAGGGGCATCAAGCCCGACGTGGTCACATACAACACCCTGATCGACGGCCTGTGCAAGAGCGGCAAGATCGAGGAGGCCCTGAAGCTGTTCAAGGAGATGGAGGAGAAGGGCATCACCCCCAGCGTGGTGACATACACCACACTGATCGACGGACTGTGTAAAGCCGGCGACGTGGACGAAGCCCTCGAGCTGTTCAAAGAGATGCGGAGCAAGGGCGTGAAGCCCAACGTGGTCACATACACCACCCTGATCGACGGCCTGTGCAAGGCCGGCAAGGTGGATGAGGCCCTGGAGCTGTTC…
PPR2.0	t64	GCGCCUAUAGCACUCGAA	MGNSVVTYTTLIDGLCKAGKVDEALELFDEMKERGIKPDVVTYNTLIDGLCKSGKIEEALKLFKEMEEKGITPSVVTYTTLIDGLCKAGKVDEALELFDEMKERGIKPDVVTYNTLIDGLCKSGKIEEALKLFKEMEEKGITPSVVTYNTLIDGLCKSGKIEEALKLFKEMEEKGITPSVVTYNTLIDGLCKAGRLDEAEELLEEMEEKGIKPDVVTYTTLIDGLCKAGDVDEALELFKEMRSKGVKPNVVTYNTLIDGLCKAGRLDEAEELLEEMEEKGIKPDVVTYTTLIDGLCKAGDVDEALELFKEMRSKGVKPNVVTYTTLIDGLCKAGKVDEALELFDEMKERGIKPDVVTYNTLIDGLCKSGKIEEALKLFKEMEEKGITPSVVTYTTLIDG…	ATGGGAAACTCCGTGGTCACATACACCACCCTGATCGACGGCCTGTGCAAGGCCGGCAAGGTGGATGAGGCCCTGGAGCTGTTCGACGAGATGAAGGAGAGGGGCATCAAGCCCGACGTGGTCACATACAACACCCTGATCGACGGCCTGTGCAAGAGCGGCAAGATCGAGGAGGCCCTGAAGCTGTTCAAGGAGATGGAGGAGAAGGGCATCACCCCCAGCGTGGTGACATACACCACCCTGATCGACGGCCTGTGCAAGGCCGGCAAAGTGGACGAGGCCCTGGAGCTGTTCGACGAGATGAAGGAGAGGGGCATCAAGCCCGACGTGGTCACATACAACACCCTGATCGACGGCCTGTGCAAGAGCGGCAAGATCGAGGAGGCCCTGAAGCTGTTC…
PPR2.0	t65	UUCACACUCGAAGAUUUC	MGNSVVTYNTLIDGLCKAGRLDEAEELLEEMEEKGIKPDVVTYNTLIDGLCKAGRLDEAEELLEEMEEKGIKPDVVTYNTLIDGLCKSGKIEEALKLFKEMEEKGITPSVVTYTTLIDGLCKAGDVDEALELFKEMRSKGVKPNVVTYNTLIDGLCKSGKIEEALKLFKEMEEKGITPSVVTYTTLIDGLCKAGDVDEALELFKEMRSKGVKPNVVTYNTLIDGLCKSGKIEEALKLFKEMEEKGITPSVVTYNTLIDGLCKAGRLDEAEELLEEMEEKGIKPDVVTYNTLIDGLCKSGKIEEALKLFKEMEEKGITPSVVTYTTLIDGLCKAGKVDEALELFDEMKERGIKPDVVTYTTLIDGLCKAGDVDEALELFKEMRSKGVKPNVVTYTTLIDG…	ATGGGAAACTCCGTGGTCACATACAACACCCTGATCGACGGCCTGTGCAAGGCCGGCAGACTGGACGAAGCCGAGGAGCTGCTGGAGGAGATGGAGGAGAAGGGCATCAAGCCCGACGTGGTCACATACAACACCCTGATCGACGGCCTGTGCAAGGCCGGCAGACTGGATGAGGCCGAGGAGCTGCTGGAGGAGATGGAGGAGAAGGGCATCAAGCCCGACGTGGTCACATACAACACCCTGATCGACGGCCTGTGCAAGAGCGGCAAGATCGAGGAGGCCCTGAAGCTGTTCAAGGAGATGGAGGAGAAGGGCATCACCCCCAGCGTGGTCACATACACCACACTGATCGACGGACTGTGTAAAGCCGGCGACGTGGACGAAGCCCTCGAGCTGTTC…
PPR2.0	t66	AGCAGCAGCAGCAGCAGC	MGNSVVTYTTLIDGLCKAGDVDEALELFKEMRSKGVKPNVVTYTTLIDGLCKAGKVDEALELFDEMKERGIKPDVVTYNTLIDGLCKSGKIEEALKLFKEMEEKGITPSVVTYTTLIDGLCKAGDVDEALELFKEMRSKGVKPNVVTYTTLIDGLCKAGKVDEALELFDEMKERGIKPDVVTYNTLIDGLCKSGKIEEALKLFKEMEEKGITPSVVTYTTLIDGLCKAGDVDEALELFKEMRSKGVKPNVVTYTTLIDGLCKAGKVDEALELFDEMKERGIKPDVVTYNTLIDGLCKSGKIEEALKLFKEMEEKGITPSVVTYTTLIDGLCKAGDVDEALELFKEMRSKGVKPNVVTYTTLIDGLCKAGKVDEALELFDEMKERGIKPDVVTYNTLIDG…	ATGGGAAACTCCGTGGTCACATACACCACACTGATCGACGGACTGTGTAAAGCCGGCGACGTGGACGAAGCCCTCGAGCTGTTCAAAGAGATGCGGAGCAAGGGCGTGAAGCCCAACGTGGTCACATACACCACCCTGATCGACGGCCTGTGCAAGGCCGGCAAGGTGGATGAGGCCCTGGAGCTGTTCGACGAGATGAAGGAGAGGGGCATCAAGCCCGACGTGGTGACATACAACACCCTGATCGACGGCCTGTGCAAGAGCGGCAAGATCGAGGAGGCCCTGAAGCTGTTCAAGGAGATGGAGGAGAAGGGCATCACCCCCAGCGTGGTCACATACACCACACTGATCGACGGACTGTGTAAAGCCGGCGACGTGGACGAAGCCCTCGAGCTGTTC…
PPR2.0	t67	GGGGUAAACUGGGGUCGC	MGNSVVTYTTLIDGLCKAGKVDEALELFDEMKERGIKPDVVTYTTLIDGLCKAGKVDEALELFDEMKERGIKPDVVTYTTLIDGLCKAGKVDEALELFDEMKERGIKPDVVTYTTLIDGLCKAGKVDEALELFDEMKERGIKPDVVTYNTLIDGLCKAGRLDEAEELLEEMEEKGIKPDVVTYTTLIDGLCKAGDVDEALELFKEMRSKGVKPNVVTYTTLIDGLCKAGDVDEALELFKEMRSKGVKPNVVTYTTLIDGLCKAGDVDEALELFKEMRSKGVKPNVVTYNTLIDGLCKSGKIEEALKLFKEMEEKGITPSVVTYNTLIDGLCKAGRLDEAEELLEEMEEKGIKPDVVTYTTLIDGLCKAGKVDEALELFDEMKERGIKPDVVTYTTLIDG…	ATGGGAAACTCCGTGGTCACATACACCACCCTGATCGACGGCCTGTGCAAGGCCGGCAAGGTGGACGAAGCCCTGGAGCTGTTCGACGAGATGAAGGAGAGGGGCATCAAGCCCGACGTGGTCACATACACCACCCTGATCGACGGCCTGTGCAAGGCCGGCAAGGTGGATGAGGCCCTGGAGCTGTTCGACGAGATGAAGGAGAGGGGCATCAAGCCCGACGTGGTCACATACACCACCCTGATCGACGGCCTGTGCAAGGCCGGCAAAGTGGACGAGGCCCTGGAGCTGTTCGACGAGATGAAGGAGAGGGGCATCAAGCCCGACGTGGTCACATACACCACCCTGATCGACGGCCTGTGCAAGGCCGGCAAGGTGGACGAAGCCCTGGAGCTGTTC…
PPR2.0	t68	UUUGUUUCAGAAUCUCGG	MGNSVVTYNTLIDGLCKAGRLDEAEELLEEMEEKGIKPDVVTYNTLIDGLCKAGRLDEAEELLEEMEEKGIKPDVVTYNTLIDGLCKAGRLDEAEELLEEMEEKGIKPDVVTYTTLIDGLCKAGKVDEALELFDEMKERGIKPDVVTYNTLIDGLCKAGRLDEAEELLEEMEEKGIKPDVVTYNTLIDGLCKAGRLDEAEELLEEMEEKGIKPDVVTYNTLIDGLCKAGRLDEAEELLEEMEEKGIKPDVVTYNTLIDGLCKSGKIEEALKLFKEMEEKGITPSVVTYTTLIDGLCKAGDVDEALELFKEMRSKGVKPNVVTYTTLIDGLCKAGKVDEALELFDEMKERGIKPDVVTYTTLIDGLCKAGDVDEALELFKEMRSKGVKPNVVTYTTLIDG…	ATGGGAAACTCCGTGGTCACATACAACACCCTGATCGACGGCCTGTGCAAGGCCGGCAGACTGGACGAAGCCGAGGAGCTGCTGGAGGAGATGGAGGAGAAGGGCATCAAGCCCGACGTGGTCACATACAACACCCTGATCGACGGCCTGTGCAAGGCCGGCAGACTGGATGAGGCCGAGGAGCTGCTGGAGGAGATGGAGGAGAAGGGCATCAAGCCCGACGTGGTCACATACAACACCCTGATCGACGGCCTGTGCAAGGCCGGCAGACTGGATGAGGCCGAGGAGCTGCTGGAGGAGATGGAGGAGAAGGGCATCAAGCCCGACGTGGTCACATACACCACCCTGATCGACGGCCTGTGCAAGGCCGGCAAGGTGGACGAAGCCCTGGAGCTGTTC…
PPR2.0	t69	CGAUGGCUCUUCUCCACU	MGNSVVTYNTLIDGLCKSGKIEEALKLFKEMEEKGITPSVVTYTTLIDGLCKAGKVDEALELFDEMKERGIKPDVVTYTTLIDGLCKAGDVDEALELFKEMRSKGVKPNVVTYNTLIDGLCKAGRLDEAEELLEEMEEKGIKPDVVTYTTLIDGLCKAGKVDEALELFDEMKERGIKPDVVTYTTLIDGLCKAGKVDEALELFDEMKERGIKPDVVTYNTLIDGLCKSGKIEEALKLFKEMEEKGITPSVVTYNTLIDGLCKAGRLDEAEELLEEMEEKGIKPDVVTYNTLIDGLCKSGKIEEALKLFKEMEEKGITPSVVTYNTLIDGLCKAGRLDEAEELLEEMEEKGIKPDVVTYNTLIDGLCKAGRLDEAEELLEEMEEKGIKPDVVTYNTLIDG…	ATGGGAAACTCCGTGGTCACATACAACACCCTGATCGACGGCCTGTGCAAGAGCGGCAAGATCGAGGAGGCCCTGAAGCTGTTCAAGGAGATGGAGGAGAAGGGCATCACCCCCAGCGTGGTCACATACACCACCCTGATCGACGGCCTGTGCAAGGCCGGCAAGGTGGATGAGGCCCTGGAGCTGTTCGACGAGATGAAGGAGAGGGGCATCAAGCCCGACGTGGTCACATACACCACACTGATCGACGGACTGTGTAAAGCCGGCGACGTGGACGAAGCCCTCGAGCTGTTCAAAGAGATGCGGAGCAAGGGCGTGAAGCCCAACGTGGTCACATACAACACCCTGATCGACGGCCTGTGCAAGGCCGGCAGACTGGACGAGGCCGAAGAGCTGCTG…
PPR2.0	t70	CCAGUCCAAGUGUGGCUC	MGNSVVTYNTLIDGLCKSGKIEEALKLFKEMEEKGITPSVVTYNTLIDGLCKSGKIEEALKLFKEMEEKGITPSVVTYTTLIDGLCKAGDVDEALELFKEMRSKGVKPNVVTYTTLIDGLCKAGKVDEALELFDEMKERGIKPDVVTYNTLIDGLCKAGRLDEAEELLEEMEEKGIKPDVVTYNTLIDGLCKSGKIEEALKLFKEMEEKGITPSVVTYNTLIDGLCKSGKIEEALKLFKEMEEKGITPSVVTYTTLIDGLCKAGDVDEALELFKEMRSKGVKPNVVTYTTLIDGLCKAGDVDEALELFKEMRSKGVKPNVVTYTTLIDGLCKAGKVDEALELFDEMKERGIKPDVVTYNTLIDGLCKAGRLDEAEELLEEMEEKGIKPDVVTYTTLIDG…	ATGGGAAACTCCGTGGTCACATACAACACCCTGATCGACGGCCTGTGCAAGAGCGGCAAGATCGAGGAGGCCCTGAAGCTGTTCAAGGAGATGGAGGAGAAGGGCATCACCCCCAGCGTGGTCACATACAACACCCTGATCGACGGCCTGTGCAAGAGCGGCAAGATCGAGGAGGCCCTGAAGCTGTTCAAGGAGATGGAGGAGAAGGGCATCACCCCCAGCGTGGTGACATACACCACACTGATCGACGGACTGTGTAAAGCCGGCGACGTGGACGAAGCCCTCGAGCTGTTCAAAGAGATGCGGAGCAAGGGCGTGAAGCCCAACGTGGTCACATACACCACCCTGATCGACGGCCTGTGCAAGGCCGGCAAGGTGGATGAGGCCCTGGAGCTGTTC…
PPR2.0	t71	CAGCAGCAGCAGCAGCAG	MGNSVVTYNTLIDGLCKSGKIEEALKLFKEMEEKGITPSVVTYTTLIDGLCKAGDVDEALELFKEMRSKGVKPNVVTYTTLIDGLCKAGKVDEALELFDEMKERGIKPDVVTYNTLIDGLCKSGKIEEALKLFKEMEEKGITPSVVTYTTLIDGLCKAGDVDEALELFKEMRSKGVKPNVVTYTTLIDGLCKAGKVDEALELFDEMKERGIKPDVVTYNTLIDGLCKSGKIEEALKLFKEMEEKGITPSVVTYTTLIDGLCKAGDVDEALELFKEMRSKGVKPNVVTYTTLIDGLCKAGKVDEALELFDEMKERGIKPDVVTYNTLIDGLCKSGKIEEALKLFKEMEEKGITPSVVTYTTLIDGLCKAGDVDEALELFKEMRSKGVKPNVVTYTTLIDG…	ATGGGAAACTCCGTGGTCACATACAACACCCTGATCGACGGCCTGTGCAAGAGCGGCAAGATCGAGGAGGCCCTGAAGCTGTTCAAGGAGATGGAGGAGAAGGGCATCACCCCCAGCGTGGTCACATACACCACACTGATCGACGGACTGTGTAAAGCCGGCGACGTGGACGAAGCCCTCGAGCTGTTCAAAGAGATGCGGAGCAAGGGCGTGAAGCCCAACGTGGTGACATACACCACCCTGATCGACGGCCTGTGCAAGGCCGGCAAAGTGGACGAGGCCCTGGAGCTGTTCGACGAGATGAAGGAGAGGGGCATCAAGCCCGACGTGGTCACATACAACACCCTGATCGACGGCCTGTGCAAGAGCGGCAAGATCGAGGAGGCCCTGAAGCTGTTC…
SCD	sp1	UGCCCCACAGCUUUAAGG	MGNSVVTYNTLIDGLCKAGKLDEALKLFEEMVEKGIKPDVVTYTTLIDGLCKAGKLDEALKLFEEMVEKGIKPDVVTYNTLIDGLCKAGKLDEALKLFEEMVEKGIKPSVVTYNTLIDGLCKAGKLDEALKLFEEMVEKGIKPSVVTYNTLIDGLCKAGKLDEALKLFEEMVEKGIKPSVVTYNTLIDGLCKAGKLDEALKLFEEMVEKGIKPSVVTYTTLIDGLCKAGKLDEALKLFEEMVEKGIKPNVVTYNTLIDGLCKAGKLDEALKLFEEMVEKGIKPSVVTYTTLIDGLCKAGKLDEALKLFEEMVEKGIKPNVVTYTTLIDGLCKAGKLDEALKLFEEMVEKGIKPDVVTYNTLIDGLCKAGKLDEALKLFEEMVEKGIKPSVVTYNTLIDG…	ATGGGAAACTCCGTGGTCACATACAATACGCTGATTGATGGCTTATGTAAAGCGGGTAAGCTGGATGAGGCCTTAAAACTGTTTGAGGAAATGGTGGAGAAGGGCATTAAACCGGATGTGGTCACATACACCACGCTGATCGATGGTCTGTGTAAGGCCGGTAAATTAGATGAAGCGCTGAAGTTATTCGAAGAGATGGTTGAAAAAGGTATCAAGCCGGACGTGGTCACATACAACACCCTGATTGATGGCTTATGCAAAGCGGGTAAGCTGGATGAAGCGTTAAAACTGTTTGAGGAAATGGTGGAGAAGGGTATTAAACCGAGCGTGGTCACATACAACACCCTGATTGATGGCTTATGCAAAGCGGGTAAGCTGGATGAAGCGTTAAAACTGTTT…
SCD	sp2	GCUAACCUCUGCGCUUCU	MGNSVVTYTTLIDGLCKAGKLDEALKLFEEMVEKGIKPDVVTYNTLIDGLCKAGKLDEALKLFEEMVEKGIKPSVVTYNTLIDGLCKAGKLDEALKLFEEMVEKGIKPDVVTYTTLIDGLCKAGKLDEALKLFEEMVEKGIKPNVVTYTTLIDGLCKAGKLDEALKLFEEMVEKGIKPNVVTYNTLIDGLCKAGKLDEALKLFEEMVEKGIKPSVVTYNTLIDGLCKAGKLDEALKLFEEMVEKGIKPSVVTYNTLIDGLCKAGKLDEALKLFEEMVEKGIKPDVVTYNTLIDGLCKAGKLDEALKLFEEMVEKGIKPSVVTYNTLIDGLCKAGKLDEALKLFEEMVEKGIKPDVVTYTTLIDGLCKAGKLDEALKLFEEMVEKGIKPDVVTYNTLIDG…	ATGGGAAACTCCGTGGTCACATACACCACGCTGATCGATGGTCTGTGTAAGGCCGGTAAATTAGATGAAGCGCTGAAGTTATTCGAAGAGATGGTTGAAAAAGGTATCAAGCCGGATGTGGTCACATACAACACCCTGATTGATGGCTTATGCAAAGCGGGTAAGCTGGATGAAGCGTTAAAACTGTTTGAGGAAATGGTGGAGAAGGGTATTAAACCGAGCGTGGTCACATACAATACGCTGATTGATGGCTTATGTAAAGCGGGTAAGCTGGATGAGGCCTTAAAACTGTTTGAGGAAATGGTGGAGAAGGGCATTAAACCGGATGTGGTCACATACACCACGCTGATCGATGGTCTGTGTAAGGCCGGCAAATTAGATGAGGCCCTGAAGTTATTC…
SCD	sp3	GCUUCUUCCCUUCCCUCC	MGNSVVTYTTLIDGLCKAGKLDEALKLFEEMVEKGIKPDVVTYNTLIDGLCKAGKLDEALKLFEEMVEKGIKPSVVTYNTLIDGLCKAGKLDEALKLFEEMVEKGIKPDVVTYNTLIDGLCKAGKLDEALKLFEEMVEKGIKPDVVTYNTLIDGLCKAGKLDEALKLFEEMVEKGIKPSVVTYNTLIDGLCKAGKLDEALKLFEEMVEKGIKPDVVTYNTLIDGLCKAGKLDEALKLFEEMVEKGIKPDVVTYNTLIDGLCKAGKLDEALKLFEEMVEKGIKPSVVTYNTLIDGLCKAGKLDEALKLFEEMVEKGIKPSVVTYNTLIDGLCKAGKLDEALKLFEEMVEKGIKPSVVTYNTLIDGLCKAGKLDEALKLFEEMVEKGIKPDVVTYNTLIDG…	ATGGGAAACTCCGTGGTCACATACACCACGCTGATCGATGGTCTGTGTAAGGCCGGTAAATTAGATGAAGCGCTGAAGTTATTCGAAGAGATGGTTGAAAAAGGTATCAAGCCGGATGTGGTCACATACAACACCCTGATTGATGGCTTATGCAAAGCGGGTAAGCTGGATGAAGCGTTAAAACTGTTTGAGGAAATGGTGGAGAAGGGTATTAAACCGAGCGTGGTCACATACAATACGCTGATTGATGGCTTATGTAAAGCGGGTAAGCTGGATGAGGCCTTAAAACTGTTTGAGGAAATGGTGGAGAAGGGCATTAAACCGGATGTGGTCACATACAATACGCTGATTGATGGCTTATGTAAAGCGGGTAAGCTGGATGAGGCCTTAAAACTGTTT…
SCD	sp4	CCCUCCUCCCUGGCUCAG	MGNSVVTYNTLIDGLCKAGKLDEALKLFEEMVEKGIKPSVVTYNTLIDGLCKAGKLDEALKLFEEMVEKGIKPSVVTYNTLIDGLCKAGKLDEALKLFEEMVEKGIKPSVVTYNTLIDGLCKAGKLDEALKLFEEMVEKGIKPDVVTYNTLIDGLCKAGKLDEALKLFEEMVEKGIKPSVVTYNTLIDGLCKAGKLDEALKLFEEMVEKGIKPSVVTYNTLIDGLCKAGKLDEALKLFEEMVEKGIKPDVVTYNTLIDGLCKAGKLDEALKLFEEMVEKGIKPSVVTYNTLIDGLCKAGKLDEALKLFEEMVEKGIKPSVVTYNTLIDGLCKAGKLDEALKLFEEMVEKGIKPSVVTYNTLIDGLCKAGKLDEALKLFEEMVEKGIKPDVVTYTTLIDG…	ATGGGAAACTCCGTGGTCACATACAACACCCTGATTGATGGCTTATGCAAAGCGGGTAAGCTGGATGAAGCGTTAAAACTGTTTGAGGAAATGGTGGAGAAGGGTATTAAACCGAGCGTGGTCACATACAACACCCTGATTGATGGCTTATGCAAAGCGGGTAAGCTGGATGAAGCGTTAAAACTGTTTGAGGAAATGGTGGAGAAGGGTATTAAACCGAGCGTGGTCACATACAACACCCTGATTGATGGCTTATGCAAAGCGGGTAAGCTGGATGAAGCGTTAAAACTGTTTGAGGAAATGGTGGAGAAGGGTATTAAACCGAGCGTGGTCACATACAATACGCTGATTGATGGCTTATGTAAAGCGGGTAAGCTGGATGAGGCCTTAAAACTGTTT…
SCD	sp5	GCUCAGGAUCCAGGCGAU	MGNSVVTYTTLIDGLCKAGKLDEALKLFEEMVEKGIKPDVVTYNTLIDGLCKAGKLDEALKLFEEMVEKGIKPSVVTYNTLIDGLCKAGKLDEALKLFEEMVEKGIKPDVVTYNTLIDGLCKAGKLDEALKLFEEMVEKGIKPSVVTYTTLIDGLCKAGKLDEALKLFEEMVEKGIKPNVVTYTTLIDGLCKAGKLDEALKLFEEMVEKGIKPDVVTYTTLIDGLCKAGKLDEALKLFEEMVEKGIKPDVVTYTTLIDGLCKAGKLDEALKLFEEMVEKGIKPNVVTYNTLIDGLCKAGKLDEALKLFEEMVEKGIKPDVVTYNTLIDGLCKAGKLDEALKLFEEMVEKGIKPSVVTYNTLIDGLCKAGKLDEALKLFEEMVEKGIKPSVVTYTTLIDG…	ATGGGAAACTCCGTGGTCACATACACCACGCTGATCGATGGTCTGTGTAAGGCCGGTAAATTAGATGAAGCGCTGAAGTTATTCGAAGAGATGGTTGAAAAAGGTATCAAGCCGGATGTGGTCACATACAACACCCTGATTGATGGCTTATGCAAAGCGGGTAAGCTGGATGAAGCGTTAAAACTGTTTGAGGAAATGGTGGAGAAGGGTATTAAACCGAGCGTGGTCACATACAATACGCTGATTGATGGCTTATGTAAAGCGGGTAAGCTGGATGAGGCCTTAAAACTGTTTGAGGAAATGGTGGAGAAGGGCATTAAACCGGATGTGGTCACATACAACACCCTGATTGATGGCTTATGCAAAGCGGGTAAGCTGGATGAAGCGTTAAAACTGTTT…
SCD	sp6	GGCGAUAUCCGGAAGAAU	MGNSVVTYTTLIDGLCKAGKLDEALKLFEEMVEKGIKPDVVTYTTLIDGLCKAGKLDEALKLFEEMVEKGIKPDVVTYNTLIDGLCKAGKLDEALKLFEEMVEKGIKPSVVTYTTLIDGLCKAGKLDEALKLFEEMVEKGIKPDVVTYTTLIDGLCKAGKLDEALKLFEEMVEKGIKPNVVTYNTLIDGLCKAGKLDEALKLFEEMVEKGIKPDVVTYTTLIDGLCKAGKLDEALKLFEEMVEKGIKPNVVTYNTLIDGLCKAGKLDEALKLFEEMVEKGIKPDVVTYNTLIDGLCKAGKLDEALKLFEEMVEKGIKPSVVTYNTLIDGLCKAGKLDEALKLFEEMVEKGIKPSVVTYTTLIDGLCKAGKLDEALKLFEEMVEKGIKPDVVTYTTLIDG…	ATGGGAAACTCCGTGGTCACATACACCACGCTGATCGATGGTCTGTGTAAGGCCGGTAAATTAGATGAAGCGCTGAAGTTATTCGAAGAGATGGTTGAAAAAGGTATCAAGCCGGATGTGGTCACATACACCACGCTGATCGATGGTCTGTGTAAGGCCGGTAAATTAGATGAAGCGCTGAAGTTATTCGAAGAGATGGTTGAAAAAGGTATCAAGCCGGACGTGGTCACATACAACACCCTGATTGATGGCTTATGCAAAGCGGGTAAGCTGGATGAAGCGTTAAAACTGTTTGAGGAAATGGTGGAGAAGGGTATTAAACCGAGCGTGGTCACATACACCACGCTGATCGATGGTCTGTGTAAGGCCGGTAAATTAGATGAAGCGCTGAAGTTATTC…
PPR2.0	sp1	UGCCCCACAGCUUUAAGG	MGNSVVTYNTLIDGLCKAGRLDEAEELLEEMEEKGIKPDVVTYTTLIDGLCKAGKVDEALELFDEMKERGIKPDVVTYNTLIDGLCKSGKIEEALKLFKEMEEKGITPSVVTYNTLIDGLCKSGKIEEALKLFKEMEEKGITPSVVTYNTLIDGLCKSGKIEEALKLFKEMEEKGITPSVVTYNTLIDGLCKSGKIEEALKLFKEMEEKGITPSVVTYTTLIDGLCKAGDVDEALELFKEMRSKGVKPNVVTYNTLIDGLCKSGKIEEALKLFKEMEEKGITPSVVTYTTLIDGLCKAGDVDEALELFKEMRSKGVKPNVVTYTTLIDGLCKAGKVDEALELFDEMKERGIKPDVVTYNTLIDGLCKSGKIEEALKLFKEMEEKGITPSVVTYNTLIDG…	ATGGGAAACTCCGTGGTCACATACAACACCCTGATCGACGGCCTGTGCAAGGCCGGCAGACTGGATGAGGCCGAGGAGCTGCTGGAGGAGATGGAGGAGAAGGGCATCAAGCCCGACGTGGTCACATACACCACCCTGATCGACGGCCTGTGCAAGGCCGGCAAGGTGGATGAGGCCCTGGAGCTGTTCGACGAGATGAAGGAGAGGGGCATCAAGCCCGACGTGGTCACATACAACACCCTGATCGACGGCCTGTGCAAGAGCGGCAAGATCGAGGAGGCCCTGAAGCTGTTCAAGGAGATGGAGGAGAAGGGCATCACCCCCAGCGTGGTCACATACAACACCCTGATCGACGGCCTGTGCAAGAGCGGCAAGATCGAGGAGGCCCTGAAGCTGTTC…
PPR2.0	sp2	GCUAACCUCUGCGCUUCU	MGNSVVTYTTLIDGLCKAGKVDEALELFDEMKERGIKPDVVTYNTLIDGLCKSGKIEEALKLFKEMEEKGITPSVVTYNTLIDGLCKAGRLDEAEELLEEMEEKGIKPDVVTYTTLIDGLCKAGDVDEALELFKEMRSKGVKPNVVTYTTLIDGLCKAGDVDEALELFKEMRSKGVKPNVVTYNTLIDGLCKSGKIEEALKLFKEMEEKGITPSVVTYNTLIDGLCKSGKIEEALKLFKEMEEKGITPSVVTYNTLIDGLCKAGRLDEAEELLEEMEEKGIKPDVVTYNTLIDGLCKSGKIEEALKLFKEMEEKGITPSVVTYNTLIDGLCKAGRLDEAEELLEEMEEKGIKPDVVTYTTLIDGLCKAGKVDEALELFDEMKERGIKPDVVTYNTLIDG…	ATGGGAAACTCCGTGGTCACATACACCACCCTGATCGACGGCCTGTGCAAGGCCGGCAAAGTGGACGAGGCCCTGGAGCTGTTCGACGAGATGAAGGAGAGGGGCATCAAGCCCGACGTGGTCACATACAACACCCTGATCGACGGCCTGTGCAAGAGCGGCAAGATCGAGGAGGCCCTGAAGCTGTTCAAGGAGATGGAGGAGAAGGGCATCACCCCCAGCGTGGTCACATACAACACCCTGATCGACGGCCTGTGCAAGGCCGGCAGACTGGATGAGGCCGAGGAGCTGCTGGAGGAGATGGAGGAGAAGGGCATCAAGCCCGACGTGGTCACATACACCACACTGATCGACGGACTGTGTAAAGCCGGCGACGTGGACGAAGCCCTCGAGCTGTTC…
PPR2.0	sp3	GCUUCUUCCCUUCCCUCC	MGNSVVTYTTLIDGLCKAGKVDEALELFDEMKERGIKPDVVTYNTLIDGLCKSGKIEEALKLFKEMEEKGITPSVVTYNTLIDGLCKAGRLDEAEELLEEMEEKGIKPDVVTYNTLIDGLCKAGRLDEAEELLEEMEEKGIKPDVVTYNTLIDGLCKSGKIEEALKLFKEMEEKGITPSVVTYNTLIDGLCKAGRLDEAEELLEEMEEKGIKPDVVTYNTLIDGLCKAGRLDEAEELLEEMEEKGIKPDVVTYNTLIDGLCKSGKIEEALKLFKEMEEKGITPSVVTYNTLIDGLCKSGKIEEALKLFKEMEEKGITPSVVTYNTLIDGLCKSGKIEEALKLFKEMEEKGITPSVVTYNTLIDGLCKAGRLDEAEELLEEMEEKGIKPDVVTYNTLIDG…	ATGGGAAACTCCGTGGTCACATACACCACCCTGATCGACGGCCTGTGCAAGGCCGGCAAAGTGGACGAGGCCCTGGAGCTGTTCGACGAGATGAAGGAGAGGGGCATCAAGCCCGACGTGGTCACATACAACACCCTGATCGACGGCCTGTGCAAGAGCGGCAAGATCGAGGAGGCCCTGAAGCTGTTCAAGGAGATGGAGGAGAAGGGCATCACCCCCAGCGTGGTCACATACAACACCCTGATCGACGGCCTGTGCAAGGCCGGCAGACTGGATGAGGCCGAGGAGCTGCTGGAGGAGATGGAGGAGAAGGGCATCAAGCCCGACGTGGTCACATACAACACCCTGATCGACGGCCTGTGCAAGGCCGGCAGACTGGATGAGGCCGAGGAGCTGCTG…
PPR2.0	sp4	CCCUCCUCCCUGGCUCAG	MGNSVVTYNTLIDGLCKSGKIEEALKLFKEMEEKGITPSVVTYNTLIDGLCKSGKIEEALKLFKEMEEKGITPSVVTYNTLIDGLCKSGKIEEALKLFKEMEEKGITPSVVTYNTLIDGLCKAGRLDEAEELLEEMEEKGIKPDVVTYNTLIDGLCKSGKIEEALKLFKEMEEKGITPSVVTYNTLIDGLCKSGKIEEALKLFKEMEEKGITPSVVTYNTLIDGLCKAGRLDEAEELLEEMEEKGIKPDVVTYNTLIDGLCKSGKIEEALKLFKEMEEKGITPSVVTYNTLIDGLCKSGKIEEALKLFKEMEEKGITPSVVTYNTLIDGLCKSGKIEEALKLFKEMEEKGITPSVVTYNTLIDGLCKAGRLDEAEELLEEMEEKGIKPDVVTYTTLIDG…	ATGGGAAACTCCGTGGTCACATACAACACCCTGATCGACGGCCTGTGCAAGAGCGGCAAGATCGAGGAGGCCCTGAAGCTGTTCAAGGAGATGGAGGAGAAGGGCATCACCCCCAGCGTGGTCACATACAACACCCTGATCGACGGCCTGTGCAAGAGCGGCAAGATCGAGGAGGCCCTGAAGCTGTTCAAGGAGATGGAGGAGAAGGGCATCACCCCCAGCGTGGTCACATACAACACCCTGATCGACGGCCTGTGCAAGAGCGGCAAGATCGAGGAGGCCCTGAAGCTGTTCAAGGAGATGGAGGAGAAGGGCATCACCCCCAGCGTGGTCACATACAACACCCTGATCGACGGCCTGTGCAAGGCCGGCAGACTGGATGAGGCCGAGGAGCTGCTG…
PPR2.0	sp5	GCUCAGGAUCCAGGCGAU	MGNSVVTYTTLIDGLCKAGKVDEALELFDEMKERGIKPDVVTYNTLIDGLCKSGKIEEALKLFKEMEEKGITPSVVTYNTLIDGLCKAGRLDEAEELLEEMEEKGIKPDVVTYNTLIDGLCKSGKIEEALKLFKEMEEKGITPSVVTYTTLIDGLCKAGDVDEALELFKEMRSKGVKPNVVTYTTLIDGLCKAGKVDEALELFDEMKERGIKPDVVTYTTLIDGLCKAGKVDEALELFDEMKERGIKPDVVTYTTLIDGLCKAGDVDEALELFKEMRSKGVKPNVVTYNTLIDGLCKAGRLDEAEELLEEMEEKGIKPDVVTYNTLIDGLCKSGKIEEALKLFKEMEEKGITPSVVTYNTLIDGLCKSGKIEEALKLFKEMEEKGITPSVVTYTTLIDG…	ATGGGAAACTCCGTGGTCACATACACCACCCTGATCGACGGCCTGTGCAAGGCCGGCAAAGTGGACGAGGCCCTGGAGCTGTTCGACGAGATGAAGGAGAGGGGCATCAAGCCCGACGTGGTCACATACAACACCCTGATCGACGGCCTGTGCAAGAGCGGCAAGATCGAGGAGGCCCTGAAGCTGTTCAAGGAGATGGAGGAGAAGGGCATCACCCCCAGCGTGGTCACATACAACACCCTGATCGACGGCCTGTGCAAGGCCGGCAGACTGGATGAGGCCGAGGAGCTGCTGGAGGAGATGGAGGAGAAGGGCATCAAGCCCGACGTGGTCACATACAACACCCTGATCGACGGCCTGTGCAAGAGCGGCAAGATCGAGGAGGCCCTGAAGCTGTTC…
PPR2.0	sp6	GGCGAUAUCCGGAAGAAU	MGNSVVTYTTLIDGLCKAGKVDEALELFDEMKERGIKPDVVTYTTLIDGLCKAGKVDEALELFDEMKERGIKPDVVTYNTLIDGLCKSGKIEEALKLFKEMEEKGITPSVVTYTTLIDGLCKAGKVDEALELFDEMKERGIKPDVVTYTTLIDGLCKAGDVDEALELFKEMRSKGVKPNVVTYNTLIDGLCKAGRLDEAEELLEEMEEKGIKPDVVTYTTLIDGLCKAGDVDEALELFKEMRSKGVKPNVVTYNTLIDGLCKAGRLDEAEELLEEMEEKGIKPDVVTYNTLIDGLCKSGKIEEALKLFKEMEEKGITPSVVTYNTLIDGLCKSGKIEEALKLFKEMEEKGITPSVVTYTTLIDGLCKAGKVDEALELFDEMKERGIKPDVVTYTTLIDG…	ATGGGAAACTCCGTGGTCACATACACCACCCTGATCGACGGCCTGTGCAAGGCCGGCAAAGTGGACGAGGCCCTGGAGCTGTTCGACGAGATGAAGGAGAGGGGCATCAAGCCCGACGTGGTCACATACACCACCCTGATCGACGGCCTGTGCAAGGCCGGCAAGGTGGATGAGGCCCTGGAGCTGTTCGACGAGATGAAGGAGAGGGGCATCAAGCCCGACGTGGTCACATACAACACCCTGATCGACGGCCTGTGCAAGAGCGGCAAGATCGAGGAGGCCCTGAAGCTGTTCAAGGAGATGGAGGAGAAGGGCATCACCCCCAGCGTGGTCACATACACCACCCTGATCGACGGCCTGTGCAAGGCCGGCAAGGTGGATGAGGCCCTGGAGCTGTTC…
PPR3.0	sp1	UGCCCCACAGCUUUAAGG	MGNSVVTYNTNIDQLCKAGRLDEAEELLEEMEEKGIKPDVVTYTTLIDGLCKAGKVDEALELFDEMKERGIKPDVVTYNTLIDGLCKSGKIEEALKLFKEMEEKGITPSVVTYNTLIDGLCKSGKIEEALKLFKEMEEKGITPSVVTYNTLIDGLCKSGKIEEALKLFKEMEEKGITPSVVTYNTLIDGLCKSGKIEEALKLFKEMEEKGITPSVVTYTTLIDGLCKAGKVDEALELFKEMRSKGVKPNVVTYNTLIDGLCKSGKIEEALKLFKEMEEKGITPSVVTYTTLIDGLCKAGKVDEALELFKEMRSKGVKPNVVTYTTLIDGLCKAGKVDEALELFDEMKERGIKPDVVTYNTLIDGLCKSGKIEEALKLFKEMEEKGITPSVVTYNTLIDG…	ATGGGAAACTCCGTGGTCACATACAACACCAACATCGACCAGCTGTGCAAGGCTGGTCGTCTGGACGAGGCTGAGGAGCTGCTGGAGGAGATGGAGGAGAAAGGCATCAAGCCCGACGTGGTGACCTACACCACTTTAATCGACGGTTTATGCAAGGCCGGCAAGGTGGATGAGGCTTTAGAGCTGTTCGACGAGATGAAGGAGAGGGGCATTAAGCCCGACGTGGTCACATACAACACCCTGATCGACGGCCTGTGCAAGAGCGGCAAGATCGAGGAGGCCCTGAAGCTGTTCAAGGAGATGGAGGAGAAGGGCATCACCCCCAGCGTGGTCACATACAACACCCTGATCGACGGCCTGTGCAAGAGCGGCAAGATCGAGGAGGCCCTGAAGCTGTTC…
PPR3.0	sp2	GCUAACCUCUGCGCUUCU	MGNSVVTYTTNIDQLCKAGKVDEALELFDEMKERGIKPDVVTYNTLIDGLCKSGKIEEALKLFKEMEEKGITPSVVTYNTLIDGLCKAGRLDEAEELLEEMEEKGIKPDVVTYTTLIDGLCKAGKVDEALELFKEMRSKGVKPNVVTYTTLIDGLCKAGKVDEALELFKEMRSKGVKPNVVTYNTLIDGLCKSGKIEEALKLFKEMEEKGITPSVVTYNTLIDGLCKSGKIEEALKLFKEMEEKGITPSVVTYNTLIDGLCKAGRLDEAEELLEEMEEKGIKPDVVTYNTLIDGLCKSGKIEEALKLFKEMEEKGITPSVVTYNTLIDGLCKAGRLDEAEELLEEMEEKGIKPDVVTYTTLIDGLCKAGKVDEALELFDEMKERGIKPDVVTYNTLIDG…	ATGGGAAACTCCGTGGTCACATACACCACCAACATCGACCAGCTGTGCAAGGCCGGCAAAGTGGACGAGGCTTTAGAGCTGTTCGACGAGATGAAGGAGAGGGGCATCAAGCCCGACGTGGTGACCTACAACACTTTAATCGACGGTTTATGCAAGAGCGGCAAGATCGAGGAGGCTTTAAAGCTGTTCAAGGAGATGGAGGAGAAGGGCATCACCCCCAGCGTGGTCACATACAACACCCTGATCGACGGCCTGTGCAAGGCCGGCAGACTGGATGAGGCCGAGGAGCTGCTGGAGGAGATGGAGGAGAAGGGCATCAAGCCCGACGTGGTCACATACACCACACTGATCGACGGACTGTGTAAAGCCGGCAAGGTGGACGAAGCCCTCGAGCTGTTC…
PPR3.0	sp3	GCUUCUUCCCUUCCCUCC	MGNSVVTYTTNIDQLCKAGKVDEALELFDEMKERGIKPDVVTYNTLIDGLCKSGKIEEALKLFKEMEEKGITPSVVTYNTLIDGLCKAGRLDEAEELLEEMEEKGIKPDVVTYNTLIDGLCKAGRLDEAEELLEEMEEKGIKPDVVTYNTLIDGLCKSGKIEEALKLFKEMEEKGITPSVVTYNTLIDGLCKAGRLDEAEELLEEMEEKGIKPDVVTYNTLIDGLCKAGRLDEAEELLEEMEEKGIKPDVVTYNTLIDGLCKSGKIEEALKLFKEMEEKGITPSVVTYNTLIDGLCKSGKIEEALKLFKEMEEKGITPSVVTYNTLIDGLCKSGKIEEALKLFKEMEEKGITPSVVTYNTLIDGLCKAGRLDEAEELLEEMEEKGIKPDVVTYNTLIDG…	ATGGGAAACTCCGTGGTCACATACACCACCAACATCGACCAGCTGTGCAAGGCCGGCAAAGTGGACGAGGCTTTAGAGCTGTTCGACGAGATGAAGGAGAGGGGCATCAAGCCCGACGTGGTGACCTACAACACTTTAATCGACGGTTTATGCAAGAGCGGCAAGATCGAGGAGGCTTTAAAGCTGTTCAAGGAGATGGAGGAGAAGGGCATCACCCCCAGCGTGGTCACATACAACACCCTGATCGACGGCCTGTGCAAGGCCGGCAGACTGGATGAGGCCGAGGAGCTGCTGGAGGAGATGGAGGAGAAGGGCATCAAGCCCGACGTGGTCACATACAACACCCTGATCGACGGCCTGTGCAAGGCCGGCAGACTGGATGAGGCCGAGGAGCTGCTG…
PPR3.0	sp4	CCCUCCUCCCUGGCUCAG	MGNSVVTYNTNIDQLCKSGKIEEALKLFKEMEEKGITPSVVTYNTLIDGLCKSGKIEEALKLFKEMEEKGITPSVVTYNTLIDGLCKSGKIEEALKLFKEMEEKGITPSVVTYNTLIDGLCKAGRLDEAEELLEEMEEKGIKPDVVTYNTLIDGLCKSGKIEEALKLFKEMEEKGITPSVVTYNTLIDGLCKSGKIEEALKLFKEMEEKGITPSVVTYNTLIDGLCKAGRLDEAEELLEEMEEKGIKPDVVTYNTLIDGLCKSGKIEEALKLFKEMEEKGITPSVVTYNTLIDGLCKSGKIEEALKLFKEMEEKGITPSVVTYNTLIDGLCKSGKIEEALKLFKEMEEKGITPSVVTYNTLIDGLCKAGRLDEAEELLEEMEEKGIKPDVVTYTTLIDG…	ATGGGAAACTCCGTGGTCACATACAACACCAACATCGACCAGTTATGTAAAAGCGGCAAGATCGAAGAGGCTTTAAAGCTGTTTAAAGAGATGGAGGAGAAGGGTATCACCCCCAGCGTGGTGACCTACAACACTTTAATCGACGGTTTATGCAAGAGCGGTAAGATTGAGGAGGCTCTGAAGTTATTCAAGGAGATGGAAGAGAAAGGCATCACTCCCAGCGTGGTCACATACAACACCCTGATCGACGGCCTGTGCAAGAGCGGCAAGATCGAGGAGGCCCTGAAGCTGTTCAAGGAGATGGAGGAGAAGGGCATCACCCCCAGCGTGGTCACATACAACACCCTGATCGACGGCCTGTGCAAGGCCGGCAGACTGGATGAGGCCGAGGAGCTGCTG…
PPR3.0	sp5	GCUCAGGAUCCAGGCGAU	MGNSVVTYTTNIDQLCKAGKVDEALELFDEMKERGIKPDVVTYNTLIDGLCKSGKIEEALKLFKEMEEKGITPSVVTYNTLIDGLCKAGRLDEAEELLEEMEEKGIKPDVVTYNTLIDGLCKSGKIEEALKLFKEMEEKGITPSVVTYTTLIDGLCKAGKVDEALELFKEMRSKGVKPNVVTYTTLIDGLCKAGKVDEALELFDEMKERGIKPDVVTYTTLIDGLCKAGKVDEALELFDEMKERGIKPDVVTYTTLIDGLCKAGKVDEALELFKEMRSKGVKPNVVTYNTLIDGLCKAGRLDEAEELLEEMEEKGIKPDVVTYNTLIDGLCKSGKIEEALKLFKEMEEKGITPSVVTYNTLIDGLCKSGKIEEALKLFKEMEEKGITPSVVTYTTLIDG…	ATGGGAAACTCCGTGGTCACATACACCACCAACATCGACCAGCTGTGCAAGGCCGGCAAAGTGGACGAGGCTTTAGAGCTGTTCGACGAGATGAAGGAGAGGGGCATCAAGCCCGACGTGGTGACCTACAACACTTTAATCGACGGTTTATGCAAGAGCGGCAAGATCGAGGAGGCTTTAAAGCTGTTCAAGGAGATGGAGGAGAAGGGCATCACCCCCAGCGTGGTCACATACAACACCCTGATCGACGGCCTGTGCAAGGCCGGCAGACTGGATGAGGCCGAGGAGCTGCTGGAGGAGATGGAGGAGAAGGGCATCAAGCCCGACGTGGTCACATACAACACCCTGATCGACGGCCTGTGCAAGAGCGGCAAGATCGAGGAGGCCCTGAAGCTGTTC…
PPR3.0	sp6	GGCGAUAUCCGGAAGAAU	MGNSVVTYTTNIDQLCKAGKVDEALELFDEMKERGIKPDVVTYTTLIDGLCKAGKVDEALELFDEMKERGIKPDVVTYNTLIDGLCKSGKIEEALKLFKEMEEKGITPSVVTYTTLIDGLCKAGKVDEALELFDEMKERGIKPDVVTYTTLIDGLCKAGKVDEALELFKEMRSKGVKPNVVTYNTLIDGLCKAGRLDEAEELLEEMEEKGIKPDVVTYTTLIDGLCKAGKVDEALELFKEMRSKGVKPNVVTYNTLIDGLCKAGRLDEAEELLEEMEEKGIKPDVVTYNTLIDGLCKSGKIEEALKLFKEMEEKGITPSVVTYNTLIDGLCKSGKIEEALKLFKEMEEKGITPSVVTYTTLIDGLCKAGKVDEALELFDEMKERGIKPDVVTYTTLIDG…	ATGGGAAACTCCGTGGTCACATACACCACCAACATCGACCAGTTATGCAAGGCCGGCAAGGTGGATGAAGCTCTGGAGCTGTTCGACGAGATGAAGGAAAGGGGCATCAAGCCCGACGTGGTGACCTACACCACTTTAATCGACGGTTTATGCAAAGCCGGAAAGGTGGACGAGGCTTTAGAGCTGTTTGACGAGATGAAAGAGAGGGGCATTAAGCCCGACGTGGTCACATACAACACCCTGATCGACGGCCTGTGCAAGAGCGGCAAGATCGAGGAGGCCCTGAAGCTGTTCAAGGAGATGGAGGAGAAGGGCATCACCCCCAGCGTGGTCACATACACCACCCTGATCGACGGCCTGTGCAAGGCCGGCAAGGTGGATGAGGCCCTGGAGCTGTTC…
PPR3.0	t75	CAGCAGCAGCAGCAGCAG	MGNSVVTYNTNIDQLCKSGKIEEALKLFKEMEEKGITPSVVTYTTLIDGLCKAGDVDEALELFKEMRSKGVKPNVVTYTTLIDGLCKAGKVDEALELFDEMKERGIKPDVVTYNTLIDGLCKSGKIEEALKLFKEMEEKGITPSVVTYTTLIDGLCKAGKVDEALELFKEMRSKGVKPNVVTYTTLIDGLCKAGKVDEALELFDEMKERGIKPDVVTYNTLIDGLCKSGKIEEALKLFKEMEEKGITPSVVTYTTLIDGLCKAGKVDEALELFKEMRSKGVKPNVVTYTTLIDGLCKAGKVDEALELFDEMKERGIKPDVVTYNTLIDGLCKSGKIEEALKLFKEMEEKGITPSVVTYTTLIDGLCKAGKVDEALELFKEMRSKGVKPNVVTYTTLIDG…	ATGGGAAACTCCGTGGTCACATACAACACCAACATCGACCAGCTGTGCAAGAGCGGCAAGATCGAGGAGGCTTTAAAACTGTTCAAGGAGATGGAGGAGAAGGGCATCACCCCCAGCGTGGTGACCTACACCACTTTAATCGACGGTTTATGCAAGGCCGGCGATGTGGATGAGGCTTTAGAGCTGTTTAAGGAGATGAGGAGCAAGGGCGTGAAGCCCAACGTGGTCACATACACCACCCTGATCGACGGCCTGTGCAAGGCCGGCAAAGTGGACGAGGCCCTGGAGCTGTTCGACGAGATGAAGGAGAGGGGCATCAAGCCCGACGTGGTCACATACAACACCCTGATCGACGGCCTGTGCAAGAGCGGCAAGATCGAGGAGGCCCTGAAGCTGTTC…
PPR3.0	chk1a	GAAGAAGCAGUCGCAGUG	MGNSVVTYTTNIDQLCKAGKVDEALELFDEMKERGIKPDVVTYTTLIDGLCKAGKVDEALELFKEMRSKGVKPNVVTYTTLIDGLCKAGKVDEALELFKEMRSKGVKPNVVTYTTLIDGLCKAGKVDEALELFDEMKERGIKPDVVTYTTLIDGLCKAGKVDEALELFKEMRSKGVKPNVVTYTTLIDGLCKAGKVDEALELFKEMRSKGVKPNVVTYTTLIDGLCKAGKVDEALELFDEMKERGIKPDVVTYNTLIDGLCKSGKIEEALKLFKEMEEKGITPSVVTYTTLIDGLCKAGKVDEALELFKEMRSKGVKPNVVTYTTLIDGLCKAGKVDEALELFDEMKERGIKPDVVTYNTLIDGLCKAGRLDEAEELLEEMEEKGIKPDVVTYNTLIDG…	ATGGGAAACTCCGTGGTCACATACACCACCAACATCGACCAGCTCTGCAAGGCCGGCAAGGTGGATGAGGCTCTGGAGCTGTTCGACGAGATGAAGGAGAGAGGCATCAAGCCCGACGTGGTGACCTACACCACACTGATCGACGGACTGTGCAAGGCTGGCAAGGTGGACGAAGCTCTGGAACTGTTCAAGGAGATGAGGAGCAAGGGCGTGAAGCCCAACGTGGTCACATACACCACACTGATCGACGGACTGTGTAAAGCCGGCAAGGTGGACGAAGCCCTCGAGCTGTTCAAAGAGATGCGGAGCAAGGGCGTGAAGCCCAACGTGGTCACATACACCACCCTGATCGACGGCCTGTGCAAGGCCGGCAAGGTGGATGAGGCCCTGGAGCTGTTC…
PPR3.0	chk1b	UAGUGGAGGAGAGCUUUU	MGNSVVTYNTNIDQLCKAGRLDEAEELLEEMEEKGIKPDVVTYTTLIDGLCKAGKVDEALELFKEMRSKGVKPNVVTYTTLIDGLCKAGKVDEALELFDEMKERGIKPDVVTYNTLIDGLCKAGRLDEAEELLEEMEEKGIKPDVVTYTTLIDGLCKAGKVDEALELFDEMKERGIKPDVVTYTTLIDGLCKAGKVDEALELFDEMKERGIKPDVVTYTTLIDGLCKAGKVDEALELFKEMRSKGVKPNVVTYTTLIDGLCKAGKVDEALELFDEMKERGIKPDVVTYTTLIDGLCKAGKVDEALELFDEMKERGIKPDVVTYTTLIDGLCKAGKVDEALELFKEMRSKGVKPNVVTYTTLIDGLCKAGKVDEALELFDEMKERGIKPDVVTYTTLIDG…	ATGGGAAACTCCGTGGTCACATACAACACCAACATCGACCAGCTCTGCAAGGCCGGCAGACTGGACGAGGCCGAAGAGCTGCTGGAGGAGATGGAGGAGAAGGGCATCAAGCCCGACGTGGTGACCTACACCACACTGATCGACGGACTGTGCAAAGCCGGCAAGGTGGATGAGGCTCTGGAGCTGTTCAAGGAGATGAGGAGCAAGGGCGTGAAGCCCAATGTGGTCACATACACCACCCTGATCGACGGCCTGTGCAAGGCCGGCAAAGTGGACGAGGCCCTGGAGCTGTTCGACGAGATGAAGGAGAGGGGCATCAAGCCCGACGTGGTCACATACAACACCCTGATCGACGGCCTGTGCAAGGCCGGCAGACTGGATGAGGCCGAGGAGCTGCTG…
