# Supplementary material for: Construction of a Versatile, Programmable RNA-Binding Protein Using Designer PPR Proteins and Its Application for Splicing Control in Mammalian Cells
Source: Cells. 2022 Nov 8;11(22):3529. doi: 10.3390/cells11223529 (PMC9688318; doi:10.3390/cells11223529)
Supplement: Supplementary file 1 [file cells-11-03529-s001.zip › Table_S4_YY_eta.xlsx]

## Sheet: Sheet1
Table S4. RNA probes used in this study
Target name	Target sequence	Probe name	Probe sequence
t1	GAAUGAACUCUUCCGGGA	Probe_t1	GACAUGCGAAUGAACUCUUCCGGGAGACUG
t2	GAGAGGAAGCCUGAGAGU	Probe_t2	GACAUGCGAGAGGAAGCCUGAGAGUGACUG
t3	CUGAGUCAUAACCAGCCU	Probe_t3	GACAUGCCUGAGUCAUAACCAGCCUGACUG
t4	GGCAAAAAGAUCACUGUA	Probe_t4	GACAUGCGGCAAAAAGAUCACUGUAGACUG
t5	CAACAUCAGUCUGAUAAG	Probe_t5	GACAUGCCAACAUCAGUCUGAUAAGGACUG
t6	CACAAUGUGGCCGAGGAC	Probe_t6	GACAUGCCACAAUGUGGCCGAGGACGACUG
t7	AAGCCAGUUUUCAUUUUG	Probe_t7	GACAUGCAAGCCAGUUUUCAUUUUGGACUG
t8	CACUAUUUAAGUUAUCAA	Probe_t8	GACAUGCCACUAUUUAAGUUAUCAAGACUG
t9	CAAACUUUCACUUUGAAA	Probe_t9	GACAUGCCAAACUUUCACUUUGAAAGACUG
t10	GGUGGUGAGGCCCUGGGC	Probe_t10	GACAUGCGGUGGUGAGGCCCUGGGCGACUG
t11	GACUCAGGAAUCGGCUCU	Probe_t11	GACAUGCGACUCAGGAAUCGGCUCUGACUG
t12	CAACAUCAAAGACACCAU	Probe_t12	GACAUGCCAACAUCAAAGACACCAUGACUG
t13	GUCAGAGGGUUCUGGAUU	Probe_t13	GACAUGCGUCAGAGGGUUCUGGAUUGACUG
t14	GCAGAUAAUUAAUAAGAA	Probe_t14	GACAUGCGCAGAUAAUUAAUAAGAAGACUG
t15	AAGGAUAAUAUCAAACAC	Probe_t15	GACAUGCAAGGAUAAUAUCAAACACGACUG
t16	UUAUCAGACUGAUGUUGA	Probe_t16	GACAUGCUUAUCAGACUGAUGUUGAGACUG
t17	GGUUAGAGAUACAGUGUG	Probe_t17	GACAUGCGGUUAGAGAUACAGUGUGGACUG
t18	GUGGGGGUGGUAGGAAAU	Probe_t18	GACAUGCGUGGGGGUGGUAGGAAAUGACUG
t19	GUGAUGUGGAGUUAAGGC	Probe_t19	GACAUGCGUGAUGUGGAGUUAAGGCGACUG
t20	GGAAGAGUGUCUGGAGCA	Probe_t20	GACAUGCGGAAGAGUGUCUGGAGCAGACUG
t21	UGAUGAUGAUGAUGAUGA	Probe_t21	GACAUGCUGAUGAUGAUGAUGAUGAGACUG
t22	UCUUUGCCAUUUCCCAUA	Probe_t22	GACAUGCUCUUUGCCAUUUCCCAUAGACUG
t23	CCCAUAGAUGUGACAAGC	Probe_t23	GACAUGCCCCAUAGAUGUGACAAGCGACUG
t24	GGCGGGGCACUGUGCGUG	Probe_t24	GACAUGCGGCGGGGCACUGUGCGUGGACUG
t25	GUGAAGGUGACAGCAGUC	Probe_t25	GACAUGCGUGAAGGUGACAGCAGUCGACUG
t26	CGGGCCUCCGGUGUUCUG	Probe_t26	GACAUGCCGGGCCUCCGGUGUUCUGGACUG
t27	CUUAUCAGACUGAUGUUG	Probe_t27	GACAUGCCUUAUCAGACUGAUGUUGGACUG
t28	ACGUGGAUGAAGUUGGUG	Probe_t28	GACAUGCACGUGGAUGAAGUUGGUGGACUG
t29	AGCUUAUCAGACUGAUGU	Probe_t29	GACAUGCAGCUUAUCAGACUGAUGUGACUG
t30	GCUUAUCAGACUGAUGUU	Probe_t30	GACAUGCGCUUAUCAGACUGAUGUUGACUG
t31	CAUGUUCGAAUUCGUUUU	Probe_t31	GACAUGCCAUGUUCGAAUUCGUUUUGACUG
t32	UGCUGGGCAAGGUGAACG	Probe_t32	GACAUGCUGCUGGGCAAGGUGAACGGACUG
t33	UAGCUUAUCAGACUGAUG	Probe_t33	GACAUGCUAGCUUAUCAGACUGAUGGACUG
t34	UUUUAUUGUGCUAUGGCA	Probe_t34	GACAUGCUUUUAUUGUGCUAUGGCAGACUG
t35	UCCUCACCGGUGACUGGU	Probe_t35	GACAUGCUCCUCACCGGUGACUGGUGACUG
t36	UGUUUUGGUUAAUAAAAC	Probe_t36	GACAUGCUGUUUUGGUUAAUAAAACGACUG
t37	CCUGUUAUGUGUGUGAUU	Probe_t37	GACAUGCCCUGUUAUGUGUGUGAUUGACUG
t38	CUGAGAGUUGGCAUGAAU	Probe_t38	GACAUGCCUGAGAGUUGGCAUGAAUGACUG
t39	CAACCAUGCAUCUUGGAA	Probe_t39	GACAUGCCAACCAUGCAUCUUGGAAGACUG
t40	GUGCUGAUUCCUAGACUU	Probe_t40	GACAUGCGUGCUGAUUCCUAGACUUGACUG
t41	CGCUGAGCUGCUGCCUGG	Probe_t41	GACAUGCCGCUGAGCUGCUGCCUGGGACUG
t42	UGUGCUAUGGCAAAUCUG	Probe_t42	GACAUGCUGUGCUAUGGCAAAUCUGGACUG
t43	UUGUUUGCUUUGCUAAAG	Probe_t43	GACAUGCUUGUUUGCUUUGCUAAAGGACUG
t44	ACGUCCCGGGAGGCGGCA	Probe_t44	GACAUGCACGUCCCGGGAGGCGGCAGACUG
t45	CGUGUGGAUCGGCGGCUC	Probe_t45	GACAUGCCGUGUGGAUCGGCGGCUCGACUG
t46	UCCAGGCUGUGCUAUCCC	Probe_t46	GACAUGCUCCAGGCUGUGCUAUCCCGACUG
t47	UCAGGAUUUAAAAACUGG	Probe_t47	GACAUGCUCAGGAUUUAAAAACUGGGACUG
t48	UCUAGAAUCCUAAAGGCA	Probe_t48	GACAUGCUCUAGAAUCCUAAAGGCAGACUG
t49	UUGUGGCCUUUUUCUCCU	Probe_t49	GACAUGCUUGUGGCCUUUUUCUCCUGACUG
t50	UGGUGUAUCUUGUCUUUA	Probe_t50	GACAUGCUGGUGUAUCUUGUCUUUAGACUG
t51	GAUAUCGCCGCGCUCGUC	Probe_t51	GACAUGCGAUAUCGCCGCGCUCGUCGACUG
t52	ACAACGGCUCCGGCAUGU	Probe_t52	GACAUGCACAACGGCUCCGGCAUGUGACUG
t53	AGCCAUACUAUUUAUGUG	Probe_t53	GACAUGCAGCCAUACUAUUUAUGUGGACUG
t54	UGAAAGCGAAAGUAAAGC	Probe_t54	GACAUGCUGAAAGCGAAAGUAAAGCGACUG
t55	CUGGAUCUUAGCAACGUC	Probe_t55	GACAUGCCUGGAUCUUAGCAACGUCGACUG
t56	GUCUAUUUUCCCACCCUU	Probe_t56	GACAUGCGUCUAUUUUCCCACCCUUGACUG
t57	UUGGUAUCAAGGUUACAA	Probe_t57	GACAUGCUUGGUAUCAAGGUUACAAGACUG
t58	GCUCGUGGAGACCAUCUU	Probe_t58	GACAUGCGCUCGUGGAGACCAUCUUGACUG
t59	GGAGCGAGCAUCCCCCAA	Probe_t59	GACAUGCGGAGCGAGCAUCCCCCAAGACUG
t60	CUUUUUUCUGGCUACCAA	Probe_t60	GACAUGCCUUUUUUCUGGCUACCAAGACUG
t61	CUCCUCCUGAGCGCAAGU	Probe_t61	GACAUGCCUCCUCCUGAGCGCAAGUGACUG
t62	CGCCUCUGGCCGUACCAC	Probe_t62	GACAUGCCGCCUCUGGCCGUACCACGACUG
t63	GCAGCAGCAGCAGCAGCA	Probe_t63	GACAUGCGCAGCAGCAGCAGCAGCAGACUG
t64	GCGCCUAUAGCACUCGAA	Probe_t64	GACAUGCGCGCCUAUAGCACUCGAAGACUG
t65	UUCACACUCGAAGAUUUC	Probe_t65	GACAUGCUUCACACUCGAAGAUUUCGACUG
t66	AGCAGCAGCAGCAGCAGC	Probe_t66	GACAUGCAGCAGCAGCAGCAGCAGCGACUG
t67	GGGGUAAACUGGGGUCGC	Probe_t67	GACAUGCGGGGUAAACUGGGGUCGCGACUG
t68	UUUGUUUCAGAAUCUCGG	Probe_t68	GACAUGCUUUGUUUCAGAAUCUCGGGACUG
t69	CGAUGGCUCUUCUCCACU	Probe_t69	GACAUGCCGAUGGCUCUUCUCCACUGACUG
t70	CCAGUCCAAGUGUGGCUC	Probe_t70	GACAUGCCCAGUCCAAGUGUGGCUCGACUG
t71	CAGCAGCAGCAGCAGCAG	Probe_t71	GACAUGCCAGCAGCAGCAGCAGCAGGACUG
chk1a	GAAGAAGCAGUCGCAGUG	Probe_chk1a	GACAUGCGAAGAAGCAGUCGCAGUGGACUG
chk1b	UAGUGGAGGAGAGCUUUU	Probe_chk1b	GACAUGCUAGUGGAGGAGAGCUUUUGACUG
N1	UGGUGUAUCUUGUCUUUA	Probe_N1	GACAUGCUGGUGUAUCUUGUCUUUAGACUG
N2	GGUGGUGAGGCCCUGGGC	Probe_N2	GACAUGCGGUGGUGAGGCCCUGGGCGACUG
MS2	CAUGAGGAUCACCCAUGU	Probe_MS2	AGAAAACAUGAGGAUCACCCAUGUCUGCAG
