# Supplementary material for: Construction of a Versatile, Programmable RNA-Binding Protein Using Designer PPR Proteins and Its Application for Splicing Control in Mammalian Cells
Source: Cells. 2022 Nov 8;11(22):3529. doi: 10.3390/cells11223529 (PMC9688318; doi:10.3390/cells11223529)
Supplement: Supplementary file 1 [file cells-11-03529-s001.zip › Table_S5_YY_eta.xlsx]

## Sheet: gggenome_result
Table S5 Searching for two Miss-matched sequnece of chk1a from human genome using GGGenome
# name	strand	start	end	snippet	snippet_pos	snippet_end	query	sbjct	align	edit	match	mis	del	ins	Annotation
chr11	+	125627635	125627652	GAGTCATGTTTAATCTTTGGAAGTTTTAGAAGAAATGGAATTCTGTAATGTTAAAACTCTTTTCCTTTTTAGAGTTCAACTTGCTGTGAATAGAGTAACTGAAGAAGCAGTCGCAGTGAAGATTGTAGATATGAAGCGTGCCGTAGACTGTCCAGAAAATATTAAGAAAGAGATCTGTATCAATAAAATGCTAAATCATGAAAATGTAGTAAAATTCT	125627535	125627752	GAAGAAGCAGTCGCAGTG	GAAGAAGCAGTCGCAGTG	||||||||||||||||||	==================	18	0	0	0	Homo sapiens checkpoint kinase 1 (CHEK1), transcript
chr1	+	14161329	14161346	AGAGCAGCTTAAAACAATAACAGATCCTTATCTCACAATGTCTATGGGGCAGGAATTGTGGAGTGGCTTACCTAGTTGGTTCTGGCTCCCTGTCTCTCATGAAGATGCAGTCACAGTGTTGCCTGGCTTAACTGGAATCATTGAGAAGCTTGACTGCAACCGAAGGTTCTCCTTCCAAGATGGTGCACCCACATGGCTGGTGAGTTTGTGCTACTATT	14161229	14161446	GAAGAAGCAGTCGCAGTG	GAAGATGCAGTCACAGTG	||||| |||||| |||||	=====X======X=====	16	2	0	0
chr1	+	181541765	181541782	GCAGAGGAGCACATGTTATGTTTTGACCTGCAAAGACTCGTCTTTTTGAGTCACACATTCTTCAAGGAGTATTAGAGATCTTGTTTCTTCGTATAATAGAGAAGTAGCAGTCTCAGTGGCATGAACTCTGGAGCCAGACTGCCTGGGTTCAAATCTCAGCTTTGTCACTTACTAACACAGTGATCACTGCTGCTTGGTCTCTATGTCCTCATGTAGGC	181541665	181541882	GAAGAAGCAGTCGCAGTG	GAAGTAGCAGTCTCAGTG	|||| ||||||| |||||	====X=======X=====	16	2	0	0
chr1	+	218067962	218067979	TGATCATGCCACTGCACTCCAGCCTGGGCAACAGAGTGAGACGCCATCTCTTAAAAAATAAAAATAAAAAAGTTTAAAAAAAAATGAAAAGAAGGAGGAGGAAGAGGCAGTGGCAGTGGATTTTTTCTTCAGTGGTTGGTAAAGGAGGAGGGGGTCACAGGTGTCAGATATAAGAAAAAGGAGAGAAAAACTACACCTGTTGTTTCACCCAGTAGATG	218067862	218068079	GAAGAAGCAGTCGCAGTG	GAAGAGGCAGTGGCAGTG	||||| ||||| ||||||	=====X=====X======	16	2	0	0
chr1	+	226945803	226945820	TTCATGGGCCAGGGCTGATTGGCCTGCTGAGGAACAGCTGCCTGCTGGCTTCAGCCCCTCCTCTTTTCCCTCAGTCTTAGACAGGGACGGGGGTGACGCAGAGGAAGCAGTAGCAGTGACTGCGTCCCCTGCTCCCTCCCTGGGTCTGTGTGCCCACCATGAGCGGGATTATGAAGCTGGCTTGGAAACTCATCTGGCTTTTGCTCCTGTAAAAATCA	226945703	226945920	GAAGAAGCAGTCGCAGTG	GAGGAAGCAGTAGCAGTG	|| |||||||| ||||||	==X========X======	16	2	0	0
chr1	+	239464207	239464224	TCTCTACAAAAAATACCAAAAAAATTAGCCAGGTGTGGTGATGCACAACTGTAGTCCCAGCTACTTGGGAGGCTGAGGTATGAGAATCACTTGAACCCAGGAAGCAGCAGTTGCAGTGAACCAAGATCGTGCCACTGCACTCCAGCCTGTGTGACAGAGTGAGACCCTGTCTCAAAAAAAAAAAAAAAAAAAGTTCAGCTGTCACCTGTCTGCCCTTA	239464107	239464324	GAAGAAGCAGTCGCAGTG	GAAGCAGCAGTTGCAGTG	|||| |||||| ||||||	====X======X======	16	2	0	0
chr1	+	245049793	245049810	AAGCTCCCGTGGGGTGGAATATCCACAGCTTTCTTTGGAAGCACTGTGGTATAGTTCAGAAGTTCTCCTTTAAGTCCAAGTGCTTGACTGAGATTTGTGAGAGGCAGCAGTCGCAGTGGCAGGTAGCATGAGAGCTAGGCTGTGTGTGTGAATCCCGTTTCCACCATTTGCTACCGGTGTGATCTTGGGAAAATGTCTTAACCTTTCTGTGGTTCACT	245049693	245049910	GAAGAAGCAGTCGCAGTG	GAGGCAGCAGTCGCAGTG	|| | |||||||||||||	==X=X=============	16	2	0	0
chr2	+	29906144	29906161	CAGTTCAAGGGCCTCGCTATAGAGGGTCAGATCACAGGAGCAGAATGTTGTCCTCATCTGGGGCCATGCTTTAAGAGGAGAGGGCGTGTGGGGCAGGGGGGAAGAAGCAGGCTCAGTGAGCACTGTGAAACCTGTGGTGAATGAGGAAAAGTGACAAGGGGGCTAGAGACGTTTGTTTCCTTCCCAGCATGTATCATCATTTCTCATTATATATTTAT	29906044	29906261	GAAGAAGCAGTCGCAGTG	GAAGAAGCAGGCTCAGTG	|||||||||| | |||||	==========X=X=====	16	2	0	0
chr2	+	137401019	137401036	GCATTTGCCAGCCCTGATGGAAGTGGTGGGGCAGTCCTCAGACCCCCGGTTGAATGGCTTAGGTGAAACCGCTGACATGCCAAAGAGTTAGCACAGTGAGGAAGAAGTAGTCCCAGTGCTTCAGCCTTGGCCAGCAGGAGTGGGATCTTAAAGCCTATAGTTTTATCTGTAGATTTCTACTTCTGATTTAATCCTCAGAAATGTTCTCTGATTTAAGG	137400919	137401136	GAAGAAGCAGTCGCAGTG	GAAGAAGTAGTCCCAGTG	||||||| |||| |||||	=======X====X=====	16	2	0	0
chr2	+	149308043	149308060	AACTATATTTTATATTGACAAAACAGAGTGCTAAAGAGTCAAGTCCAGAGAACAAAGTGGAGTAGAATGAGGTGTTAATTGCATAGTATAGATTAGAAACGAAGAAGCAGTTGCAGAGAGATGATTAGGGCACAGCTTTGTTAGGTAACTACGGAGGAGGCAGCTCTTAGGCAGCATTTAAAAAATCTTGTTCTTGGTTGTATTGCATTGTTCTGGGA	149307943	149308160	GAAGAAGCAGTCGCAGTG	GAAGAAGCAGTTGCAGAG	||||||||||| |||| |	===========X====X=	16	2	0	0
chr3	+	17334477	17334494	ACTACATTAAATGAACATACTTGCTGTGGATATTTTATGTAAGACATTTTCTTTTACACTTATAAATTCTGGGAGTTAATTATTATGTCCCCATTTTATAGACGAAGCAGTTGCAGTGCAAAGATGGCTAAGTAACTTGACCAACATTACAGAGCTATGAAAATGGTGGGGTCAGGATTAAAACCTAGGTAGGACTACCTGACCAGAAAACTGAAGAC	17334377	17334594	GAAGAAGCAGTCGCAGTG	GACGAAGCAGTTGCAGTG	|| |||||||| ||||||	==X========X======	16	2	0	0
chr3	+	36556466	36556483	CAGATGGAATTTATACTGCACTCTGATAAAGATTTAAGCAGTTATTTCTTCTTTGAGTCAGTTGATTGATTTCAAAGCCAGTCCCTACCTGTTTTTTACACAAGAAGCAGTCTCAGTGCCTAGGCCTCTCTTTTCTTACCTCTCTCTTTAACCCTTCTGTCCCCACCTCCACCACCATCCAGAGACTACCACACTCAGAAATATTCCACCTCCTTGAG	36556366	36556583	GAAGAAGCAGTCGCAGTG	CAAGAAGCAGTCTCAGTG	||||||||||| |||||	X===========X=====	16	2	0	0
chr3	+	44832481	44832498	AAGAAATGCTAGTGGGGATAGGGGGTGAGATAGAGTTGGGAAATGTTTCAGAGCTACAGGTGACAGTTGTTGGTGTCCAGTTGGATATGTACCATGAAGGGAAGAAGCAGTCAGAGTGGGCACCAAGCTTTCTAGCCTGGAGGACTGAATGGTTCTGTGCACATTTCAGATGGAAAGAATAGAGGCCCACAGAAAGTTAATGAGATGCATTTTATACA	44832381	44832598	GAAGAAGCAGTCGCAGTG	GAAGAAGCAGTCAGAGTG	|||||||||||| ||||	============XX====	16	2	0	0
chr3	+	72891583	72891600	TGCCCTGTGGTGGCCTCCTTCTCTATAAATATAAAGCCAAGAGGTAAGTAAGGTCTGAGCTTTTCTGTCAAGGGGGGATTTGAAAATGGACACCATTCTGGAAGCAGCAGTCCCAGTGCACAAAACAAATGAAATCTTCCTTCTATTTTGGCTTATTGGTGATTTACAGCTGGCTGACTTCCAAAAAGAGTCTAAGACAACGTATAGTAAAAGACACA	72891483	72891700	GAAGAAGCAGTCGCAGTG	GAAGCAGCAGTCCCAGTG	|||| ||||||| |||||	====X=======X=====	16	2	0	0
chr3	+	120282673	120282690	GGATAAAGCAGGGTCAGAAGACAGGGAGTGACCACAGGCTGTTTTAGATCAGGTGGCCATCATTCTGGAGAGTATGAAAAGAAACTGGAATGAGCTGAGAAAAGAAGCAGTGGCAGTGTCTGAAGGAAGAGTGTTCAGGCAGAGGGAAGAGCAAGGACGATGGTAAGCAAGAGGACGGCCATAGAATATGAGGGCACCAGACCAAATCACAAGCCCTG	120282573	120282790	GAAGAAGCAGTCGCAGTG	AAAGAAGCAGTGGCAGTG	|||||||||| ||||||	X==========X======	16	2	0	0
chr3	+	186210190	186210207	CCCAGAGGGGACTGTGGGGCCTGGAGCCGGGAGGGCAGGCCAGAGGCAGGGGAGCTGAGTTGCTGTATTCTGGGCACAATTTCAAGGCCAGCTGCAGGGAGAACAAGCAGTCGCTGTGCGCCTGCAGCTGGCTGTGGTTAGGCCAGGGCTGTCCCTCACTTGTGGTATATTTAAAGAGACCTCACCAGACGGCTGTGCCAAGGGGAAAAAATGCACAC	186210090	186210307	GAAGAAGCAGTCGCAGTG	GAACAAGCAGTCGCTGTG	||| |||||||||| |||	===X==========X===	16	2	0	0
chr4	+	1815515	1815532	AGGGACATGCGTAGCCACTAGGTGCGTTTTCTCTCTCAACACTTGAGTTGTAACTTCAATAATTTCTCACTTCTGATGTTTCAAATGAGAGCAGCGGCTTAAAGGAGCAGTCGCAGTGACAGACCCAAACCCCTGACAGGAGGGGGTAGCTGCCCAGGAGGGTGCCGGACATGCAATGAACAGTCCCCCTGCCCCACCCCACTCCAGAGCAGGTGGCG	1815415	1815632	GAAGAAGCAGTCGCAGTG	AAAGGAGCAGTCGCAGTG	||| |||||||||||||	X===X=============	16	2	0	0
chr4	+	147997509	147997526	TTGCTGAGCTAAGACAACAGACATCCAAAACAACATTTCAAAACAAATGAACAATTTAAAAATGGAAATGAGTAGAATCAAAAGTTAAAAAATGATCGTTGATGAAGCAGTCACAGTGAATGAAAGGAGAAAGACAGATGAGAAGATGGAGAAAGCATTGGATGTGGAGGACAAAGATGGCCCATCAGAAGGCATCAACACAGGTATAGAACCAGACA	147997409	147997626	GAAGAAGCAGTCGCAGTG	GATGAAGCAGTCACAGTG	|| ||||||||| |||||	==X=========X=====	16	2	0	0
chr4	+	180029743	180029760	GTAACCCTATGCAACACAGCTAAAATCACTGTGATGAGAATCTGCATGAGCTCAAAATATAGGCAATGTGGCCAGCTATTAAACCCTTGCTAGCCTGACTGAAGAATCAGTCTCAGTGACAGCACAAGGCTGAATCTCACAGATTCCCCTATTACTCCTGAAATGTCATATCTAGGCAGTGGTTGTACTCTTGCCCAGTACATGCAGAAGGAGTACCT	180029643	180029860	GAAGAAGCAGTCGCAGTG	GAAGAATCAGTCTCAGTG	|||||| ||||| |||||	======X=====X=====	16	2	0	0
chr5	+	1315870	1315887	TTGCTACTGTTTAAACAGAGCAAGACTAACAGTCACCAGCAGCTGGTTCACGCATTAAGGCCCTTTGCAGGTGAAAGAAAACGGCACTGGAGGGCCGACTGCAGAAGCAGACGCAGTGCACGGTGGACATCTGCCCCTTTTGGGGGCCTGCCACGGTGCTTCCTGAAAACTCAGGTTAAGCTGACTCTGCTGTCAGGCTGATGAGGCGCCTGCACCCA	1315770	1315987	GAAGAAGCAGTCGCAGTG	GCAGAAGCAGACGCAGTG	| |||||||| |||||||	=X========X=======	16	2	0	0
chr5	+	6783804	6783821	AAATATGTATATATCTTGTCTAGCACACTGTTCATAGCCAGTGTTTAAAATATGACACCTTGTTTAAGTGCTATTTTCTAAAGACAGTTGTGTAGATTTTTAAGAGGCAGTCGCAGTGGTTCATTTTATATGTTAACCTGACTGGGGCAACGAATGCCCAGATAGCTGGTAAGACAGTATTCTGGATGTGTCTGCAAGGGTATTTCTGGAAGAGATTA	6783704	6783921	GAAGAAGCAGTCGCAGTG	TAAGAGGCAGTCGCAGTG	|||| ||||||||||||	X====X============	16	2	0	0
chr5	+	25900940	25900957	TAGCTACCTTGGTATCATAATATTAACTCTGTTCTTGGAAAGGAGACAGCTCAACAACTTCAACTCCGGGTGGTCAAATACACATTTCTGTACTGCAGAAGCAGAAGCAGTCGCAGTCAAAAACTGCTAAAACTAGAGACTTATGAAATATCAGCTGGCCGGGCGCGGTGGCTCATGCCTGTAATCCCAGCACTTTGGGAGGCCAAGGCGGGCGGATC	25900840	25901057	GAAGAAGCAGTCGCAGTG	GCAGAAGCAGTCGCAGTC	| |||||||||||||||	=X===============X	16	2	0	0
chr5	+	59833016	59833033	ACGGGTTCATTCGTTGAAGCAGAGATGGGGGCCGGAAGGAACGTAAGGATGAAATGGAGGGATGGGGGAAATGGAGAGGTCAGTGAAGGTCTGACAAGTAGAAGCAGCAGTGGCAGTGACATAGTTAAACTGGGAAACAAACAGGATGTGGCAACTGGAAGGCAGGCTGTCTGAACTAGGGATTTTGGAAGCAGACCGGTGTTGCATCTTAAGGACAG	59832916	59833133	GAAGAAGCAGTCGCAGTG	GAAGCAGCAGTGGCAGTG	|||| |||||| ||||||	====X======X======	16	2	0	0
chr6	+	5447221	5447238	GTATCTGGCATTACTGTGGAGTGTGAGTGGAAGAAATGCAAGTTCAAAGACAAGGAGAACAGGCGAATTGTCTAGGCGCTAAATGATGAGGGCAGGAGCTGAAGCAGCAGTAGCAGTGGGCAGAGAGGGGGCCAGATTGTGTGCCTTTTAAGAGTTATCACCAGGCTTTGTGTGCAAGGGGACCACCTTCTTGGCATGAGGAAAAGGTCATGGATTGA	5447121	5447338	GAAGAAGCAGTCGCAGTG	GAAGCAGCAGTAGCAGTG	|||| |||||| ||||||	====X======X======	16	2	0	0
chr6	+	41707886	41707903	AATTGTATCCTGTTCCTGACAGAGACACAGAGGGAGGCTACTAGGAGGCTCAGTTCCCGGCTGACTAAAAGGCAGCCACGTGGCGGCCATGGGGCTAGGGGAAGAGGCAGGCGCAGTGACAGAAAGGAAAAGGAAGTCAGAAAAACCACTACAATCACAGCCTCAGGATGCTAGAGTTGGGAGGGAAGTGGAAGACGGCTCTAGGCTCTGTGGCGCTC	41707786	41708003	GAAGAAGCAGTCGCAGTG	GAAGAGGCAGGCGCAGTG	||||| |||| |||||||	=====X====X=======	16	2	0	0
chr6	+	103281224	103281241	TATACTCATAACCTTGAAAACACTCTTCCTGTGTCTGATTAAATCAAGCACTTTTTTCACCAAGTTTGACTTCCAGATTATATAAATGGGCTTTCCTTAAGGAGAAGCAGTCACAGTGCAAAATATTTTTTTGTTTTGCCATTTTGGTAACTGGCTTTAGAAACAAGATTTTATAATTATTATGCCGTCTTAATTAGGTTTTTAGTTGCCAAATTTTA	103281124	103281341	GAAGAAGCAGTCGCAGTG	GGAGAAGCAGTCACAGTG	| |||||||||| |||||	=X==========X=====	16	2	0	0
chr6	+	116367045	116367062	TTGCAGTGGAGGTGGAATTCAATTATTATTAAGAATGTAGGTCAATGTTTCATTTTTTTTAAAGATGAAAACTAAGCCCACGAAGCTTGAGTCATCTGGAGATGAAGCAGTCGCAGCGGAGCAGTCTTGGTAATGGAGAAGATCATGTCAGCGCTGAGAAAGGCAGGGAGGGAGGCCTGAGCAAGGAAGCTTGGAGAAGCCTCTGGAGGATGCCTGGC	116366945	116367162	GAAGAAGCAGTCGCAGTG	GATGAAGCAGTCGCAGCG	|| ||||||||||||| |	==X=============X=	16	2	0	0	Homo sapiens dermatan sulfate epimerase (DSE), transcript variant 12, non-coding RNA.
chr6	+	136771651	136771668	AAAACAACCCCTTAATCTGCATGCAATTAAAAGTAGGTATAAATATGACTGCAAAGCTGCCCTGAGCTACTACTCTCTGCCTACTGGGTAGGCGTGCTCTGAAGAAGCAGTCACAGAGCTGTAACACTGCCTCTTCAATAAAGCTGTTTTCTTCTACCTCTGGCTTGCCCTTGAATTCTTTCCTGGGCAAAGCCAAGAACCCTCATGGGCTAAGCTCC	136771551	136771768	GAAGAAGCAGTCGCAGTG	GAAGAAGCAGTCACAGAG	|||||||||||| ||| |	============X===X=	16	2	0	0
chr6	+	137922085	137922102	TGAGTACATTGGTGGTCTGACCAAGGCTGCTGAGATTGGAGAACGGTTTCAGCGAGGGACCTCAAGCCTGTGCACTTTCTCATTGGAGAAGTTCTTATTTGAAGTAGCAGTAGCAGTGATGTCCAGCGGGTGGCAGCTGGAGTGGATGGCTGAGGTAGAGTGTAGAAAACATGTATTGGCAATGAGGGGGTCCCAGGAAAGAGCCCATTCAATGGGCT	137921985	137922202	GAAGAAGCAGTCGCAGTG	GAAGTAGCAGTAGCAGTG	|||| |||||| ||||||	====X======X======	16	2	0	0
chr7	+	116382233	116382250	AGACATGTGAACCTGAATATATACAGTGATCTTGATGTCTCTGCCTATGTTATTAACATAGACCAGGAGATTTTTTGTTATAATTTAGGGCCTTATAAATGAAGAAGCAGCCACAGTGTAGAATCTCAAGAGTGTCAGAATAATGTACTAGTACTTTTCAAAGCGCTTGTCAACAAGTGACCTTAGATATTAATTTTACCCAGCATTATTTTCCCTAT	116382133	116382350	GAAGAAGCAGTCGCAGTG	GAAGAAGCAGCCACAGTG	|||||||||| | |||||	==========X=X=====	16	2	0	0
chr8	+	30339779	30339796	CTTTGAAGATTGCAAAGCACCTCTAGGAACACTTCTTAGCTAATCCCTTGGGGCAGGGGCTCTAACCGGTTGATCAAGCTTGACTGGTGCATCTTTTCGGGAAGAGGCAGTAGCAGTGTTAAGAGCTCAGGCGTTAGATATTAAATCCCTGCCTCTGCTGAGAGTGACCTGGGGCAAGTTATCTTCCCTAAGCCTCAGTTTCTTTATCTATAAAGTAA	30339679	30339896	GAAGAAGCAGTCGCAGTG	GAAGAGGCAGTAGCAGTG	||||| ||||| ||||||	=====X=====X======	16	2	0	0
chr8	+	67707841	67707858	TACTTAAAAATACAAAAATTAGCTGGGCATTGTGGCATGTTCCTGTAGTCCTAGCTACTCAGGTGGCTGAAGCCGGAGAATTGCTTGAACTGGGACCTGGGAGGAAGCAGTGGCAGTGAGCTGAGATCACACCACTGTACTCCAGCCTGGGCTACAGGGCAAGACTCCATCTCAAAAAAAAAAAAAAAATCAAATTTGACTTATAGAGCCAATAAAAG	67707741	67707958	GAAGAAGCAGTCGCAGTG	GAGGAAGCAGTGGCAGTG	|| |||||||| ||||||	==X========X======	16	2	0	0
chr8	+	77038101	77038118	ACCTTGTCTCTTAAAAAAAAAAAAAAAGCCAGGCGTGGTGGCACATGCCTGTAGTCTCAGCTAGTCTCGAAACTGAGGTGGGAGGATCACATGAACCTGGGAAGAAGCAGCTGCAGTGACCTGTGATAGCATCACCACACCCCAGCCTGGGTGACAGAGAAAGAAACCACGTCAAAAAAAAATTGTTTAGGTGCCTTTATATTTATTTGATTCTGGTT	77038001	77038218	GAAGAAGCAGTCGCAGTG	GAAGAAGCAGCTGCAGTG	|||||||||| ||||||	==========XX======	16	2	0	0
chr8	+	92586476	92586493	GCTAATCAGGTCACAGGTGATGAAGGAGTTGGTGCTAGAATTAGGCCTTCAAGTATGAATGGACAATAGAAATGGAAGAGAAGGTAGAGTGAACGTTATGGAAGAAGCAGTAGGAGTGGTCATAAACAGAGCAGAAAGAATCTGGAAAAATGACCACACAGATGGAGAGGATCTACGCAAAGAGAACTGCAGAAAATCAGTCAGAAGGCTCAATACTC	92586376	92586593	GAAGAAGCAGTCGCAGTG	GAAGAAGCAGTAGGAGTG	||||||||||| | ||||	===========X=X====	16	2	0	0
chr8	+	116470267	116470284	ACTTGTTGTTTGGTATTATTACTATTATTATATATTGTATTCTTTCTATATAATCTCTTAAATATTCTTACAAAAAAGAATCATTTACAAGAAGAGATTAGAAGAAGCAGTCCCAATGAATTGCAAAAGTATTTTAACAACTTTTTATGTTTCATGAAAACAGTCAGAGAAAAATACTCTACAAAAAGATCAATTATTTTGCTTCATAGAAAAGACTG	116470167	116470384	GAAGAAGCAGTCGCAGTG	GAAGAAGCAGTCCCAATG	|||||||||||| || ||	============X==X==	16	2	0	0
chr9	+	26859564	26859581	AGCTTTTCTTATCCTTTATAGAACATTCTCTTCTCCTCAGATGATGTAATAGCATATCCTCCATACTGCCTGTTCATTTGATACAAAGAGCAGAAACAAAGAAGAAACAGTAGCAGTGTAGTCTAATTATACATGAGGTGTAATCTAATTATACATGAGGTGTAAGGTAATATGATTATGATTATATTATATAAAAATAATATGTGTTTAGCATGTAT	26859464	26859681	GAAGAAGCAGTCGCAGTG	GAAGAAACAGTAGCAGTG	|||||| |||| ||||||	======X====X======	16	2	0	0
chr9	+	33976939	33976956	AAAATGTATATATATATACAAAAATTAGCCAGACATGGTGGCGCATGCCTGTAATGCCAGCTATTAGGGAGGCTGAGGCAGGAGAATTGCTTGAACCTGGGAGGCAGCAGTCGCAGTGAGCCGAGATGGCGCCACTGCACTCCAGCCTGGGTGACAAAGTAAGACTCGGTCTTGGAAAAAACAAAAACAGTTGTTTTTTATTTATTTTTTTTTTTTTT	33976839	33977056	GAAGAAGCAGTCGCAGTG	GAGGCAGCAGTCGCAGTG	|| | |||||||||||||	==X=X=============	16	2	0	0
chr9	+	113676268	113676285	TCGTCTCTACTAAAAGTACAAAAATTAGCTGCGCGTGGTGGCACGTATCTGTAATCCCAGCTACTTGGGAGGCTGAGGCAGGAGAATCACTTGAACCTGGGAAGAAGAAGTTGCAGTGAGCCAAGATCGTGCCACTGCACTCCAGCCCAGGCAACAGAGTGAGACTCTGTCTCAAAAAAAAAAAAAAAAAAGGTGGAGAAATAGACTCTACCTCTCTC	113676168	113676385	GAAGAAGCAGTCGCAGTG	GAAGAAGAAGTTGCAGTG	||||||| ||| ||||||	=======X===X======	16	2	0	0
chr10	+	75397745	75397762	ATGTTCCCCAAGGCCAACTTCGCGGCTGGTAGCCCCTTCCGACGCCTTTGCCTCCCAGAAAATCACAACAAAGCGATCGGAAATTCAGCCACGGTCCCGGGAAGAAGGAGTAGCAGTGAGGCCCCGGAACCCACTGCGGCCGAAACTGCCATGCTCTCTTTAACCAAAATAAAAAAGATAAGAAGAAGAAGTAAAACCCTTTAATACATCAAATATAC	75397645	75397862	GAAGAAGCAGTCGCAGTG	GAAGAAGGAGTAGCAGTG	||||||| ||| ||||||	=======X===X======	16	2	0	0
chr11	+	68528319	68528336	AAGAAATGCTTGAAATATCAAAGCAGTTTCAAGTTGAAACTGGAAAAGATTCTGGAATACCTGGGTGGTAGAAAGCTGATTGCTTTTGACACCTTCTTTGGAAGAAGCAGTTGCAGAGATACGATAAAACTGGGTTTGAGTTTGTATTACCCTCTTCTCTAAAGAAATATATTGACTCTAGTAGGCACCTGATATTTGATTTAATTTGTGTGTGTGGG	68528219	68528436	GAAGAAGCAGTCGCAGTG	GAAGAAGCAGTTGCAGAG	||||||||||| |||| |	===========X====X=	16	2	0	0
chr11	+	120065869	120065886	ATCCCCATGAACCAAGCTTTAGAGGGCACTTTTTTCCTCTTCTCCATTTAGCATCTGCTGGGAAATGGAAGGGAACCTGGGAAGAACTTGCAATAACTGGGAAGAAGCAGACGAAGTGCCACTCCTGCCTGATGATGCCAGCAGCCCTGCAGGGTCCTCCTTTATCCACTCAGCCCCACACCAAGAAGAATTTCAGAAGGCCAGTGGTGGCTCCAGAC	120065769	120065986	GAAGAAGCAGTCGCAGTG	GAAGAAGCAGACGAAGTG	|||||||||| || ||||	==========X==X====	16	2	0	0
chr12	+	17802688	17802705	TCCTTCGGCATCTGGGAGGCACTTTGCATACATAGGCCTTTCACGGATCAAATGGCGAGCTGGCCAGGAGAAGCCAAGAAATCAAAGTATGGACAGGGGAGAAGAAGCATTCGCAGGGGGAATTCCATGGTGACCCTCCTCATCTATGGGGGGGTGGTGGTGTCCATTTGGCAGATGCCTGTGGACTACCACTTGAGTACAGCTACACCCTGAAATGC	17802588	17802805	GAAGAAGCAGTCGCAGTG	GAAGAAGCATTCGCAGGG	||||||||| |||||| |	=========X======X=	16	2	0	0
chr12	+	68828888	68828905	TTATCTGGTGAACGACAAAGAAAACGCCACAAATCTGATAGTATTTCCCTTTCCTTTGATGAAAGCCTGGCTCTGTGTGTAATAAGGGAGATATGTTGTGAAAGAAGCAGTAGCAGTGAATCTACAGGGACGCCATCGAATCCGGTAATGTTCTCATTTTAAGTAAGGCAAGACTCTTACTGTTCAAAGTCTAGTCCTGGCAGTCCTAATAAGGATAC	68828788	68829005	GAAGAAGCAGTCGCAGTG	AAAGAAGCAGTAGCAGTG	|||||||||| ||||||	X==========X======	16	2	0	0	Homo sapiens MDM2 proto-oncogene (MDM2), transcript, mRNA.
chr13	+	31748924	31748941	AAATACAAAAAAGAAAAAGAAAAATTAGCTGGGCGTGGTGTTGTGCACCTGTAGTCCCAGCTACTCAGGAGGCTAAGGCAGGAGAATCTCTTGAACCCAGGAAGCAGCAGTTGCAGTGGGCCAAGATCGTGCCACTGCACTCCAGTCTGGTGACACAGCAAGATTCCATCTCAAAAAAAATAAATACAAGGACGTTCTTAATTTGTATATTGTCTAAT	31748824	31749041	GAAGAAGCAGTCGCAGTG	GAAGCAGCAGTTGCAGTG	|||| |||||| ||||||	====X======X======	16	2	0	0
chr13	+	103164159	103164176	GTTGCAATCATGACCACTTGCAACCAAAGCATCTAGACTTTGATGGGGTCACAGGGAGGGTTGTCCTCGGCTTGGTCTCCTATGTTCCATTGACACTTGAGAAAAAGCAGTCGCAGAGATCCCCTGAAACATTTTTTTGTGTGTGTGGTGGTTCTTACTGATGACATCCTGAGGTTTCATTTTGGATTTTCTTCCTACAGGGTGACATGCACAAATAA	103164059	103164276	GAAGAAGCAGTCGCAGTG	GAAAAAGCAGTCGCAGAG	||| |||||||||||| |	===X============X=	16	2	0	0
chr14	+	70779154	70779171	GAATAACGTGAGTCCAGGTCCAAGAGGGCTGAGGGGCCTTGACATATCTAAGAAATAGTCCCTTGTAGCTGGAGCAGAACTTTCATGAGGTAGAAAGGGAGAAGAAGGAGCCGCAGTGAAGGGCTGGGGCAGGACTGGAAGACTACAGACCCTGCCAAGGAACTTGGAAATGACCCTGGAGTCACAAGTAGTTTTTAAGCAGAAAAGTGTTGTGACAA	70779054	70779271	GAAGAAGCAGTCGCAGTG	GAAGAAGGAGCCGCAGTG	||||||| || |||||||	=======X==X=======	16	2	0	0
chr14	+	72009979	72009996	CTTTGAAGAAGTTCATAGTCCATTTGGTTCCTTTGCTGGAGGAATCTAAATCCTGGCTTGGTATTATGAAGCAGGCTTACTCTCTTTTTTCTGTGGCCTAGAAGAATCAATCGCAGTGGCAGCAGCCTGCCTTAACGTTGTCAGGTTCTGCCATCTTCCCTGTTGAATGAGATCCATGGGTATAAGAATTAGTGTATGACCATGCCTCTTCTCTTTTA	72009879	72010096	GAAGAAGCAGTCGCAGTG	GAAGAATCAATCGCAGTG	|||||| || ||||||||	======X==X========	16	2	0	0
chr14	+	97835933	97835950	GTCTAAATCCCCACTTAGTTGGCTCCACAGGAGGAAAGCAATGAACATGGAGGCTCTGTTGAACACACACATCAGGGCAATGGGATTAGAGCCAAACAAAGAAGATGCAGTGGCAGTGAGCTCAGAGGCCACATGAATTCAGCAGCCACATGTGTGTGGCAGAAACATGGGCCATTTGAGGGATTCTCTGAAAGGCAGGTGTCCCATAGGTGGGTGAA	97835833	97836050	GAAGAAGCAGTCGCAGTG	GAAGATGCAGTGGCAGTG	||||| ||||| ||||||	=====X=====X======	16	2	0	0
chr14	+	101495917	101495934	GTGTATGTTAAAGAAAAAGGTAAAAGGCAAACAAACCAACAACAACAAAAACAAACCGAAAGACAGGCCCTGGTCCATGACTCTCCAAAGTGGTTTTGCAGAAGAAGCATTCACAGTGGAACCGCCTTTCTCTTTTACCCTCTGAGCTCCATGGGCCAAAGTCACTGTGTACCTGGCCCCACTTCATCTGGCCAGAGGCCACTGTTTGTAAAGCAGCA	101495817	101496034	GAAGAAGCAGTCGCAGTG	GAAGAAGCATTCACAGTG	||||||||| || |||||	=========X==X=====	16	2	0	0
chr15	+	64020025	64020042	GCTTTCCATTTTCATGCCACAGAGTCAATATTTACTAGCCATGTTGCTAAAAACAGGCACTGGTCACAGACTTGGTGCCAAACCACTGTGTCTAATCTCAGCAGAAGCAGTCTCAGTGGCACCCGCAGGCTTTACTGTGCCATAAGCCATGGCTCTAGATGAGTGATTCCTGCCCCAGCTGAGTAGACAGCCCATGGCCCAGTAAGAACACTTCACAT	64019925	64020142	GAAGAAGCAGTCGCAGTG	GCAGAAGCAGTCTCAGTG	| |||||||||| |||||	=X==========X=====	16	2	0	0
chr16	+	13018347	13018364	GTCATTCATTCTTTGCCTCCAAAGGCCTGATCCCAAATCTAGCAAGAGGGATCTGGCCTCCAATTTGAATCTAGTCTCACGCAGGTTGGCCCTGCTTCCTGAAGAAGCTGTCGCAATGGCCAGTGAAGACCAGCTTTTTGGTATTGCCTGTTTCCTTTCTGTTCTTCTCTCCTACTCTCAGTCTGTCTACCCCACCTGCTAGCATTTGCCCAGCACCC	13018247	13018464	GAAGAAGCAGTCGCAGTG	GAAGAAGCTGTCGCAATG	|||||||| |||||| ||	========X======X==	16	2	0	0
chr16	+	17860945	17860962	CCATCTCTACTAAAACTACAAAAATCAGCTGGGCGTGGTGGTGCGAGCCTGTAATCCCAGCTACTCTGGAGGCCGAGGTAGGAGTATCACTTGAACCTGGGAAGAGGAAGTCGCAGTGAGTTGAGATTGTGCCACTGCACTCCAGCCTGGGCGAAAGAGTAAAACTCCGTCTCAAAAATAAAATAAAATAAAATAAATAATAAAAATTAAAAAAATAA	17860845	17861062	GAAGAAGCAGTCGCAGTG	GAAGAGGAAGTCGCAGTG	||||| | ||||||||||	=====X=X==========	16	2	0	0
chr17	+	81696520	81696537	CCCTGCGCGAAGAGCACCGGGAGAAGCTTCGCCGGGCAGCCGAGGAGGCAGAGCGCCAGCGCCAGATCCAGCTGGCCCAGAAGCTGGAGATAATGCGGCAGAAGAAGCAGGTGCAGTGGCTGCCCAGCCACAGGCCGGGGCCGGCTGGGGGACCTCGCAGCATAACCAGCATGTTTTTGCCGCACAGGAGTACCTGGAGGTGCAGAGGCAGCTGGCCA	81696420	81696637	GAAGAAGCAGTCGCAGTG	GAAGAAGCAGGTGCAGTG	|||||||||| ||||||	==========XX======	16	2	0	0
chr18	+	11072671	11072688	TGCTTACTGTGTGACAAGCCCGGATCTATGCATTTCACGTCAATTAACTCTTGTAGTTATTATCATCATTTTACAAAGTCTTTTATTTCTTTTTACATGTGAAGAAGCAGGCCCAGTGGGTACAGCTATGTAGCCTGGCTGAGGTTTGCACCACTGCAGTCGGGATCCTGAGTCTGTGCTGTCTTCAAGAAGTGCATGACCTCACCGCCGTACCACAT	11072571	11072788	GAAGAAGCAGTCGCAGTG	GAAGAAGCAGGCCCAGTG	|||||||||| | |||||	==========X=X=====	16	2	0	0
chr18	+	43367166	43367183	GACACAACAAACATCTGTATGACATCCATAGAGGAAATGGAGCAAATCAGGAACCTGCATTGTTATCACTAGCTGTCTGGGTTCCACATATTAAGCAAGCTAAGAAGCAGTTGCAGTGACTATATTACTCATCTGAAGATCTTATGCTGATTAGCTATAACTGAAAATTCATAAAAAGATTCTTAATATAAATCCCAAAAGCTCTTCTGAGAAATAGT	43367066	43367283	GAAGAAGCAGTCGCAGTG	TAAGAAGCAGTTGCAGTG	|||||||||| ||||||	X==========X======	16	2	0	0
chr18	+	66567249	66567266	TTTCATATTAGCAGGTAACTCCTTTATCTCCTTTACAATTTTATCTATAGTTTCAAAGGAAGATTCCTAGCATGTTACATCATAATATATGCAAGAAGAAGAAGAAGCAGTGGCAGAGGAAGAAAAGCAAGAAGCAGAGGGAGGAAGGAGGAAGAGAGGGAATAAGGAGACAGAGGGGAGGGCAGTAAGGGAAAGGAGTAGAAGGTGGAGAAGGGGGA	66567149	66567366	GAAGAAGCAGTCGCAGTG	GAAGAAGCAGTGGCAGAG	||||||||||| |||| |	===========X====X=	16	2	0	0
chr19	+	13473181	13473198	CATCTCTATCAAAAATTTAAAAATTAGCTGAGTATGGTGGTGCACGCCTGTAAGTCCCAGCTGCTCAGGAGGCTGAGGTGGGAGGATTGTTTGATGCTGGGAAGCAGCAGTTGCAGTGAGCTATAATTGCACTGCTGTACTCTTGTACAGGGTGACAGAGTGAGGCCCTGACAAAAAAAAAAAAAAGAGAGAGAGAGAAGAGGAAGAGAAGACACTGA	13473081	13473298	GAAGAAGCAGTCGCAGTG	GAAGCAGCAGTTGCAGTG	|||| |||||| ||||||	====X======X======	16	2	0	0
chr19	+	28319091	28319108	TGCTCACTTCCTTTGCAAGCAGAGTGTTGCTCTGCAGTGTGCTCCTGAGAGGAAAAAACTGCCCTGTTGGTTCAGGTCAGTCAAGCCAAGCTCAGTCACAGAATAAGCAGGCGCAGTGGGGGCAGAAGGTAGGGAGGGCATGGGGAATGTGGTACCACTGGGGCGGAGAGCAAAGCAATGGGGAGTCAGTCTCCCACATGTGTCTTCTATCAGTTTAT	28318991	28319208	GAAGAAGCAGTCGCAGTG	GAATAAGCAGGCGCAGTG	||| |||||| |||||||	===X======X=======	16	2	0	0
chr20	+	32054403	32054420	GATTGTTTTGTGTGCTTTAAAAATGCTATCTATGCAGTGGTTCATGCCTGTAATCCCAGCTACTCGGGAGGCTGAGGCAGGAGAATCGCTTGAACCCGGGGAAGCAGAAGTCGCAGTGAGCCGAGATCGCGCCATTGCACTCCAGCCTGGACAACAAAAGCGAAACTCCACCTAAAAAAAAAAAAAAAAAAAAAAAAAAAAAAAAAAAAAAAAAAAAA	32054303	32054520	GAAGAAGCAGTCGCAGTG	GAAGCAGAAGTCGCAGTG	|||| || ||||||||||	====X==X==========	16	2	0	0
chr20	+	41270303	41270320	ACATGGTGAAACCCCGTCTCTACTAAAAATGGCCGGGCATGGTGGTGTGCGCCTGTAATCCCAGCTACTCAGGGGGCTGAGGCAGAAGACTTGAACCCAGGAAGCAGCAGTTGCAGTGAGCCGAGATCGCACCACTGCACTCCAGCCTGGGCAACAGAGCGAAACTCCGTCCAAAAAAAAAAAAAAAAAAAGGCCGGGCACGGTGGCTCACACCTGTA	41270203	41270420	GAAGAAGCAGTCGCAGTG	GAAGCAGCAGTTGCAGTG	|||| |||||| ||||||	====X======X======	16	2	0	0
chr20	+	45082256	45082273	CCCTGTCTCTACTAAAAATACAAAAATTAGCTGGGCATGGTGGCAGGCCTGTAATCCCAGCTACTCGGGAGGCCGAGGCAGGAGAATCGCTTGGACCCAAGAAGCAGCAGTTGCAGTGAGCCGAGATTGTGCCACTGCACTCCAGCCTGGGTGACAGAGCGAGACTCCATCTCAGAAAAGAAAAAAAAATTGTGTCTGTCTTTCTTCCTTAAACAATA	45082156	45082373	GAAGAAGCAGTCGCAGTG	GAAGCAGCAGTTGCAGTG	|||| |||||| ||||||	====X======X======	16	2	0	0
chr22	+	45424520	45424537	TGGGCAGGCCACCCACTGCGTCCATTTGATCATCTGCAGAATGAGGAAGCGACAACACCCTCCTGTGTCGGTCAGAATGTGCTAACCCTTGCTGGGATAAGAAGCAGCAGTCTCAGTGGCTTAAACAGAAAGTTGATGTTCCATGCATGCTCCCTGCCCGCCATGGACAGGCTGTGAGGCCTGTTCCTTGGCATCCTCACTTTGGAGCCCAGGTCCTG	45424420	45424637	GAAGAAGCAGTCGCAGTG	GAAGCAGCAGTCTCAGTG	|||| ||||||| |||||	====X=======X=====	16	2	0	0
chr22	+	47077672	47077689	TTGCACATTGAGTATTTATGGTGCTCTTTCTATGTGCCTGGAGCTGTTGTAAGGAGCCCAGCAATGAGGTGCTCACACTCTGGTGGGGAGTGAGACAAGTGAAGAGGCAGTCGCACTGCAGAGCACCGAAGGCTGCGGTGGCAGAAGCACGGGGACCATGGGATCAGTGAGCAGGGCCATTGGGCTTAGTCTGAGGGGTCAGAGAAGGCTTTCTGGGA	47077572	47077789	GAAGAAGCAGTCGCAGTG	GAAGAGGCAGTCGCACTG	||||| ||||||||| ||	=====X=========X==	16	2	0	0
chrY	+	12917486	12917503	CATATTTTTGCTTACAGTAATAGATTCAGTGGAGGATTTGGTGCCAGAGACTATCGACAAAGTAGTGGTTCCAGCAGTTCTGGCTTTGGTGCTAGTCGCGGAAGCAGCAGCCGCAGTGGTGGAGGTGGTTACGGCAACAGCAGAGGATTTGGTGGAGGTAATGTTAATTTTTCTTTTAGGAAGGGCTTTTTGTTTTTCTTTTTTTTTTTTTTTTGAGA	12917386	12917603	GAAGAAGCAGTCGCAGTG	GAAGCAGCAGCCGCAGTG	|||| ||||| |||||||	====X=====X=======	16	2	0	0	Homo sapiens DEAD-box helicase 3 Y-linked (DDX3Y), transcript, non-coding RNA.
chrY	+	21599785	21599802	CCAAAAGGTTTGGAGACTCACAAAAAGAAGAAGAAGAAAAGAAGAAGAAGAAGAAGAAGAAGAAGAAGAAGAAGAAGAAGAAGAAGAAGAAGAAGAAGAAGAAGAAGCAGAAGCAGTGCTGAAGTGCATTAGCCATATTCCTTTAAGCAGGCTCCACTTACAGGCAAACACACCCACACACATAAGCACTCACAAACACATAATGCCACACACACACA	21599685	21599902	GAAGAAGCAGTCGCAGTG	GAAGAAGCAGAAGCAGTG	|||||||||| ||||||	==========XX======	16	2	0	0
